# Supplementary material for: The Glyphosate-Based Herbicide Roundup Does Not Elevate Genome-Wide Mutagenesis of Escherichia coli
Source: G3 (Bethesda). 2017 Aug 9;7(10):3331–5. doi: 10.1534/g3.117.300133 (PMC5633383; doi:10.1534/g3.117.300133)
Supplement: Supplementary file 1 [file 3331FileS1.xlsx]

## Sheet: S1
Table S1. Mutation stats of MA lines under different treatment
Genetic background	Roundup concentration (ppm)	Lines	Coverage	A sites	C sites	G sites	T sites	Total sites	Transfers	Cell divisions	GC>AT	AT>GC	AT>TA	GC>TA	AT>CG	GC>CG	BPS rate	Insertions	Deletions	Indel rate
wild-type	0	A1	101.531	1034275	1069611	1065995	1034980	4204861	87	2131.5	1	1	0	1	0	0	3.34722e-10	0	0	0
wild-type	0	A2	111.096	1034275	1069611	1065995	1034980	4204861	113	2768.5	1	1	1	0	0	0	2.57706e-10	0	0	0
wild-type	0	A3	125.267	1034275	1069611	1065995	1034980	4204861	87	2131.5	0	1	1	0	0	0	2.23148e-10	0	0	0
wild-type	0	A4	116.725	1034275	1069611	1065995	1034980	4204861	113	2768.5	1	1	0	0	0	0	1.71804e-10	1	1	1.71804e-10
wild-type	0	A5	110.223	1031806	1067625	1063788	1032414	4195633	87	2131.5	0	0	0	0	0	0	0	0	1	1.11819e-10
wild-type	0	A7	112.725	1033698	1069352	1065733	1034483	4203266	87	2131.5	0	3	1	0	0	0	4.46465e-10	0	0	0
wild-type	0	A8	71.5755	1033920	1069338	1065718	1034584	4203560	113	2768.5	0	0	0	2	0	0	1.71857e-10	0	0	0
wild-type	0	A9	236.482	1034275	1069611	1065995	1034980	4204861	87	2131.5	0	1	0	0	0	0	1.11574e-10	0	2	2.23148e-10
wild-type	0	A10	82.6986	1034275	1069611	1065995	1034980	4204861	113	2768.5	0	2	0	0	0	0	1.71804e-10	0	0	0
wild-type	0	A11	170.573	1034275	1069611	1065995	1034980	4204861	87	2131.5	0	2	0	1	1	0	4.46296e-10	0	1	1.11574e-10
wild-type	0	A12	91.4073	1033988	1069488	1065879	1034747	4204102	113	2768.5	1	0	1	0	0	0	1.71835e-10	0	0	0
wild-type	0	A13	124.252	1031678	1067522	1063667	1032296	4195163	87	2131.5	3	0	0	0	1	0	4.47328e-10	0	0	0
wild-type	0	A14	84.418	1034275	1069611	1065995	1034980	4204861	113	2768.5	2	2	0	0	0	0	3.43608e-10	0	1	8.59021e-11
wild-type	0	A15	115.873	1034275	1069611	1065995	1034980	4204861	87	2131.5	1	0	0	0	0	0	1.11574e-10	0	0	0
wild-type	0	A16	50.1539	1034275	1069611	1065995	1034980	4204861	113	2768.5	0	0	0	0	1	0	8.59021e-11	0	0	0
wild-type	0	A17	88.454	1034275	1069611	1065995	1034980	4204861	87	2131.5	0	0	0	1	0	0	1.11574e-10	0	0	0
wild-type	0	A18	142.135	1034275	1069610	1065995	1034980	4204860	113	2768.5	1	1	0	1	0	0	2.57706e-10	0	0	0
wild-type	0	A19	159.524	1034275	1069611	1065995	1034980	4204861	87	2131.5	0	0	0	0	2	0	2.23148e-10	0	1	1.11574e-10
wild-type	0	A20	115.732	1034275	1069611	1065995	1034980	4204861	113	2768.5	0	0	1	0	0	0	8.59021e-11	1	0	8.59021e-11
wild-type	0	A21	56.1026	1034236	1069581	1065958	1034958	4204733	87	2131.5	1	0	1	0	0	0	2.23155e-10	0	0	0
wild-type	0	A23	102.223	1034275	1069611	1065995	1034980	4204861	87	2131.5	0	0	2	0	0	0	2.23148e-10	0	0	0
wild-type	0	A25	223.463	1034275	1069611	1065995	1034980	4204861	87	2131.5	0	3	0	0	1	1	5.5787e-10	0	0	0
wild-type	0	A26	97.1579	1034275	1069611	1065995	1034980	4204861	113	2768.5	2	2	0	1	1	1	6.01315e-10	1	0	8.59021e-11
wild-type	0	A28	72.0529	1034275	1069611	1065995	1034980	4204861	113	2768.5	0	0	0	1	1	0	1.71804e-10	0	0	0
wild-type	0	A29	223.757	1034275	1069611	1065995	1034980	4204861	87	2131.5	2	2	0	0	0	0	4.46296e-10	0	1	1.11574e-10
wild-type	0	A30	136.674	1034275	1069611	1065995	1034980	4204861	113	2768.5	2	2	0	0	4	0	6.87217e-10	0	0	0
wild-type	0	A31	152.7	1034275	1069611	1065995	1034980	4204861	87	2131.5	2	1	0	1	0	0	4.46296e-10	0	0	0
wild-type	0	A32	98.99	1034275	1069611	1065995	1034980	4204861	113	2768.5	1	2	0	1	1	0	4.29511e-10	0	0	0
Sum of mutations											21	27	8	10	13	2	81	3	8
Pooled mutation rate											1.44707e-10	1.92028e-10	5.6897e-11	6.89083e-11	9.24577e-11	1.37817e-11	2.83489e-10			3.84985e-11
SEM											3.38258e-11	3.95922e-11	2.16147e-11	1.97165e-11	3.13029e-11	9.72285e-12	3.30366e-11			1.19605e-11
wild-type	6.4	D1	173.754	1113943	1149216	1144818	1114081	4522058	87	2114.1	0	2	1	0	0	0	3.13805e-10	0	1	1.04602e-10
wild-type	6.4	D2	212.567	1113943	1149216	1144818	1114081	4522058	114	2770.2	3	3	0	0	2	0	6.3862e-10	0	1	7.98275e-11
wild-type	6.4	D3	118.122	1113943	1149216	1144818	1114081	4522058	87	2114.1	2	0	1	1	0	1	5.23008e-10	0	0	0
wild-type	6.4	D4	90.4197	1113440	1148812	1144412	1113645	4520309	114	2770.2	0	0	0	0	1	1	1.59717e-10	0	0	0
wild-type	6.4	D5	174.805	1113020	1148526	1144020	1113129	4518695	87	2114.1	0	4	0	0	1	0	5.23397e-10	0	1	1.04679e-10
wild-type	6.4	D7	93.4344	1113943	1149216	1144818	1114081	4522058	87	2114.1	0	1	0	0	0	0	1.04602e-10	0	0	0
wild-type	6.4	D8	131.725	1113943	1149216	1144818	1114081	4522058	114	2770.2	0	1	0	0	1	0	1.59655e-10	0	0	0
wild-type	6.4	D9	163.417	1113832	1149090	1144727	1113980	4521629	87	2114.1	2	0	1	0	0	0	3.13835e-10	0	0	0
wild-type	6.4	D10	87.249	1113943	1149216	1144818	1114081	4522058	114	2770.2	1	0	0	0	1	0	1.59655e-10	0	0	0
wild-type	6.4	D11	167.899	1113943	1149216	1144818	1114081	4522058	87	2114.1	1	1	1	0	0	1	4.18406e-10	0	1	1.04602e-10
wild-type	6.4	D13	205.501	1112596	1146984	1142465	1112549	4514594	87	2114.1	0	0	1	0	0	0	1.04775e-10	0	0	0
wild-type	6.4	D15	245.421	1113943	1149216	1144818	1114081	4522058	87	2114.1	1	0	0	0	2	0	3.13805e-10	0	0	0
wild-type	6.4	D16	107.838	1113943	1149216	1144818	1114081	4522058	114	2770.2	0	1	0	0	1	0	1.59655e-10	0	0	0
wild-type	6.4	D17	118.254	1113943	1149216	1144818	1114081	4522058	87	2114.1	0	0	0	0	0	0	0	0	0	0
wild-type	6.4	D18	162.348	1113938	1149204	1144808	1114058	4522008	114	2770.2	1	1	0	0	0	0	1.59657e-10	0	0	0
wild-type	6.4	D19	51.3169	1111900	1146318	1141776	1111842	4511836	87	2114.1	1	0	1	0	1	1	4.19354e-10	0	0	0
wild-type	6.4	D20	52.2648	1111892	1146300	1141714	1111830	4511736	114	2770.2	1	0	0	0	0	0	8.00102e-11	0	0	0
wild-type	6.4	D21	165.407	1113943	1149216	1144818	1114081	4522058	87	2114.1	0	0	1	1	0	0	2.09203e-10	0	0	0
wild-type	6.4	D23	77.3345	1113943	1149216	1144818	1114081	4522058	87	2114.1	1	2	0	0	0	0	3.13805e-10	0	0	0
wild-type	6.4	D24	117.319	1113943	1149216	1144818	1114081	4522058	114	2770.2	0	4	0	2	1	0	5.58793e-10	1	0	7.98275e-11
wild-type	6.4	D25	143.215	1113943	1149216	1144818	1114081	4522058	87	2114.1	5	1	1	1	0	0	8.36813e-10	0	0	0
wild-type	6.4	D27	72.3244	1113943	1149216	1144818	1114081	4522058	87	2114.1	0	1	0	0	1	0	2.09203e-10	0	0	0
wild-type	6.4	D29	133.208	1113943	1149216	1144818	1114081	4522058	87	2114.1	1	1	1	0	1	0	4.18406e-10	0	0	0
wild-type	6.4	D30	120.333	1113943	1149216	1144818	1114081	4522058	114	2770.2	0	2	1	1	0	2	4.78965e-10	0	0	0
wild-type	6.4	D31	117.756	1113943	1149216	1144818	1114081	4522058	87	2114.1	1	0	0	1	0	1	3.13805e-10	0	0	0
Sum of mutations											21	25	10	7	13	7	83	1	4
Pooled mutation rate											1.55848e-10	1.91016e-10	7.64066e-11	5.19493e-11	9.93286e-11	5.19493e-11	3.1247e-10			1.88235e-11
SEM											4.66084e-11	4.58783e-11	2.0826e-11	1.94336e-11	2.4666e-11	1.94412e-11	4.01713e-11			7.81197e-12
wild-type	51.2	E1	160.511	910921	943415	940074	910793	3705203	87	2157.6	0	0	0	0	4	0	5.00354e-10	0	0	0
wild-type	51.2	E3	150.317	910921	943415	940074	910793	3705203	87	2157.6	0	0	1	0	0	0	1.25088e-10	0	0	0
wild-type	51.2	E5	118.233	910921	943415	940074	910793	3705203	87	2157.6	0	0	0	0	0	0	0	0	0	0
wild-type	51.2	E6	139.935	910921	943415	940074	910793	3705203	115	2852	0	1	0	0	1	0	1.89264e-10	0	0	0
wild-type	51.2	E7	59.3843	910920	943415	940074	910793	3705202	87	2157.6	0	1	0	0	0	0	1.25088e-10	0	1	1.25088e-10
wild-type	51.2	E8	100.342	910919	943415	940073	910792	3705199	115	2852	1	1	0	0	1	0	2.83897e-10	1	0	9.46322e-11
wild-type	51.2	E9	130.474	910921	943415	940074	910793	3705203	87	2157.6	2	0	0	0	1	0	3.75265e-10	1	0	1.25088e-10
wild-type	51.2	E10	156.669	910776	943238	939898	910575	3704487	115	2852	0	1	0	1	2	0	3.78602e-10	0	0	0
wild-type	51.2	E11	114.974	910921	943415	940074	910793	3705203	87	2157.6	0	0	1	1	0	0	2.50177e-10	0	0	0
wild-type	51.2	E12	90.9044	910921	943415	940074	910793	3705203	115	2852	1	0	0	0	0	0	9.46321e-11	0	0	0
wild-type	51.2	E13	103.308	910902	943399	940056	910767	3705124	87	2157.6	2	0	1	0	1	1	6.25455e-10	0	1	1.25091e-10
wild-type	51.2	E14	188.668	910148	943036	939588	910106	3702878	115	2852	2	1	1	3	0	0	6.62841e-10	0	0	0
wild-type	51.2	E15	61.749	910921	943415	940074	910793	3705203	87	2157.6	1	0	0	0	0	0	1.25088e-10	0	0	0
wild-type	51.2	E17	111.396	910921	943415	940074	910793	3705203	87	2157.6	1	0	0	0	1	0	2.50177e-10	0	0	0
wild-type	51.2	E19	116.343	910921	943415	940074	910793	3705203	87	2157.6	1	0	0	0	1	1	3.75265e-10	0	0	0
wild-type	51.2	E21	184.518	910921	943415	940074	910793	3705203	87	2157.6	0	0	1	0	0	0	1.25088e-10	0	0	0
wild-type	51.2	E22	177.519	910921	943415	940074	910793	3705203	115	2852	0	1	1	0	0	0	1.89264e-10	1	1	1.89264e-10
wild-type	51.2	E23	76.4987	910921	943415	940074	910793	3705203	87	2157.6	0	0	1	0	1	1	3.75265e-10	0	0	0
wild-type	51.2	E24	117.371	910921	943415	940074	910793	3705203	115	2852	1	1	0	1	0	1	3.78528e-10	0	0	0
wild-type	51.2	E25	245.742	910921	943415	940074	910793	3705203	87	2157.6	1	0	0	0	2	0	3.75265e-10	0	0	0
wild-type	51.2	E26	86.4494	910921	943415	940074	910793	3705203	115	2852	1	0	1	0	2	0	3.78528e-10	1	1	1.89264e-10
wild-type	51.2	E27	168.821	910889	943381	940036	910773	3705079	87	2157.6	0	1	0	0	0	0	1.25093e-10	0	0	0
wild-type	51.2	E28	66.6664	910921	943415	940074	910793	3705203	115	2852	0	0	0	0	0	0	0	0	0	0
wild-type	51.2	E29	155.185	910921	943415	940074	910793	3705203	87	2157.6	0	1	0	0	1	0	2.50177e-10	0	1	1.25088e-10
wild-type	51.2	E30	59.9495	910921	943415	940074	910793	3705203	115	2852	1	0	0	0	1	0	1.89264e-10	0	0	0
wild-type	51.2	E31	187.977	910920	943415	940074	910793	3705202	87	2157.6	0	1	1	0	1	0	3.75265e-10	0	1	1.25088e-10
wild-type	51.2	E32	54.8915	910921	943414	940074	910793	3705202	115	2852	1	1	0	1	1	0	3.78528e-10	0	1	9.46321e-11
Sum of mutations											16	11	9	7	21	4	68	4	7
Pooled mutation rate											1.28922e-10	9.16408e-11	7.49788e-11	5.64033e-11	1.74951e-10	3.22305e-11	2.78529e-10			4.50561e-11
SEM											2.99674e-11	2.10523e-11	2.18647e-11	2.41045e-11	4.33966e-11	1.62191e-11	3.24035e-11			1.28022e-11
wild-type	409.6	F1	93.8295	1112069	1146902	1142471	1112188	4513630	88	2050.4	0	1	1	0	0	0	2.16105e-10	0	0	0
wild-type	409.6	F3	35.3247	1112154	1146958	1142542	1112262	4513916	88	2050.4	0	0	0	0	0	0	0	0	1	1.08046e-10
wild-type	409.6	F4	22.7878	1112154	1146958	1142543	1112262	4513917	88	2050.4	0	0	0	0	1	0	1.08046e-10	0	0	0
wild-type	409.6	F5	123.887	1112154	1146958	1142543	1112262	4513917	88	2050.4	0	0	0	0	0	0	0	0	0	0
wild-type	409.6	F6	146.534	1112154	1146958	1142543	1112262	4513917	88	2050.4	0	0	1	0	0	0	1.08046e-10	0	0	0
wild-type	409.6	F7	142.485	1112154	1146958	1142543	1112262	4513917	88	2050.4	0	0	1	0	0	0	1.08046e-10	0	0	0
wild-type	409.6	F10	23.3217	1112153	1146955	1142543	1112261	4513912	88	2050.4	1	0	0	1	0	0	2.16092e-10	0	0	0
wild-type	409.6	F11	34.7283	1112153	1146958	1142543	1112262	4513916	88	2050.4	0	1	0	0	0	0	1.08046e-10	0	1	1.08046e-10
wild-type	409.6	F13	161.381	1112154	1146958	1142543	1112262	4513917	88	2050.4	1	0	0	0	0	0	1.08046e-10	0	2	2.16092e-10
wild-type	409.6	F14	92.2016	1112154	1146958	1142543	1112262	4513917	88	2050.4	3	0	2	0	1	0	6.48275e-10	1	0	1.08046e-10
wild-type	409.6	F15	94.618	1112153	1146957	1142543	1112261	4513914	88	2050.4	0	1	0	0	0	0	1.08046e-10	0	2	2.16092e-10
wild-type	409.6	F16	103.015	1112075	1146802	1142389	1112153	4513419	88	2050.4	3	0	0	0	0	0	3.24173e-10	0	0	0
wild-type	409.6	F17	211.081	1112154	1146958	1142543	1112262	4513917	88	2050.4	1	0	1	1	1	0	4.32183e-10	0	0	0
wild-type	409.6	F18	150.757	1112154	1146958	1142543	1112262	4513917	88	2050.4	2	1	0	0	0	0	3.24137e-10	0	0	0
wild-type	409.6	F19	134.24	1112154	1146958	1142543	1112262	4513917	88	2050.4	0	2	0	0	1	0	3.24137e-10	0	0	0
wild-type	409.6	F21	122.56	1112154	1146958	1142543	1112262	4513917	88	2050.4	0	0	0	1	0	0	1.08046e-10	0	0	0
wild-type	409.6	F22	91.0314	1112154	1146958	1142543	1112262	4513917	88	2050.4	0	0	0	0	1	0	1.08046e-10	0	0	0
wild-type	409.6	F23	146.128	1111122	1145941	1141598	1111366	4510027	88	2050.4	0	0	0	0	0	0	0	0	0	0
wild-type	409.6	F24	177.518	1111963	1146824	1142391	1112096	4513274	88	2050.4	1	1	0	1	0	0	3.24184e-10	0	1	1.08061e-10
wild-type	409.6	F25	41.0467	1112154	1146958	1142543	1112262	4513917	88	2050.4	1	0	0	1	1	0	3.24137e-10	0	0	0
wild-type	409.6	F26	32.8583	1112154	1146958	1142543	1112262	4513917	88	2050.4	0	1	0	0	0	0	1.08046e-10	0	0	0
wild-type	409.6	F27	95.5274	1112154	1146958	1142543	1112262	4513917	88	2050.4	1	0	0	0	0	0	1.08046e-10	0	0	0
wild-type	409.6	F29	135.671	1112154	1146958	1142543	1112262	4513917	88	2050.4	1	0	0	0	1	0	2.16092e-10	0	0	0
wild-type	409.6	F31	65.1279	1112131	1146935	1142517	1112238	4513821	88	2050.4	3	1	0	0	1	0	5.4024e-10	0	0	0
wild-type	409.6	F32	84.4168	1112154	1146958	1142543	1112262	4513917	88	2050.4	1	0	0	1	0	0	2.16092e-10	0	1	1.08046e-10
Sum of mutations											19	9	6	6	8	0	48	1	8
Pooled mutation rate											1.61903e-10	7.89349e-11	5.26232e-11	5.11273e-11	7.01643e-11	0	2.07458e-10			3.88984e-11
SEM											4.31001e-11	2.4935e-11	2.29258e-11	1.85711e-11	2.08771e-11	0	3.2962e-11			1.35128e-11
wild-type	3276.8	G1	244.862	1018603	1049028	1044405	1018222	4130258	87	1931.4	0	0	0	0	1	0	1.25358e-10	0	0	0
wild-type	3276.8	G3	242.898	1016450	1047320	1042532	1016068	4122370	87	1931.4	0	2	1	1	1	0	6.27987e-10	0	0	0
wild-type	3276.8	G5	243.113	1018603	1049028	1044405	1018222	4130258	87	1931.4	2	0	0	1	0	0	3.76073e-10	0	0	0
wild-type	3276.8	G7	231.653	1018603	1049028	1044405	1018222	4130258	87	1931.4	0	1	0	0	0	0	1.25358e-10	0	0	0
wild-type	3276.8	G8	199.201	1018603	1049028	1044405	1018222	4130258	87	1931.4	2	0	0	1	0	0	3.76073e-10	0	1	1.25358e-10
wild-type	3276.8	G9	182.733	1018603	1049028	1044405	1018222	4130258	87	1931.4	0	0	0	0	0	0	0	0	0	0
wild-type	3276.8	G10	100.842	1018603	1049028	1044405	1018222	4130258	87	1931.4	0	0	0	0	0	0	0	0	0	0
wild-type	3276.8	G11	239.216	1018603	1049028	1044405	1018222	4130258	87	1931.4	0	0	1	0	1	0	2.50715e-10	0	1	1.25358e-10
wild-type	3276.8	G13	57.5051	1018593	1049024	1044397	1018216	4130230	87	1931.4	1	0	1	0	0	0	2.50717e-10	0	0	0
wild-type	3276.8	G15	160.852	1018603	1049028	1044405	1018222	4130258	87	1931.4	0	0	0	0	0	0	0	0	0	0
wild-type	3276.8	G16	174.066	1018603	1049028	1044405	1018222	4130258	87	1931.4	0	0	0	0	0	0	0	0	0	0
wild-type	3276.8	G17	146.48	1018603	1049028	1044405	1018222	4130258	87	1931.4	1	0	0	0	0	0	1.25358e-10	0	0	0
wild-type	3276.8	G18	38.2426	1018603	1049028	1044405	1018222	4130258	87	1931.4	0	0	0	1	0	0	1.25358e-10	0	0	0
wild-type	3276.8	G19	83.1753	1018603	1049028	1044405	1018222	4130258	87	1931.4	1	0	0	0	0	0	1.25358e-10	0	0	0
wild-type	3276.8	G20	150.637	1018603	1049028	1044405	1018222	4130258	87	1931.4	0	1	1	1	1	0	5.0143e-10	0	0	0
wild-type	3276.8	G21	161.472	1018593	1049024	1044397	1018216	4130230	87	1931.4	0	0	0	1	1	0	2.50717e-10	0	0	0
wild-type	3276.8	G23	95.7665	1018603	1049028	1044405	1018222	4130258	87	1931.4	0	0	0	0	0	0	0	0	1	1.25358e-10
wild-type	3276.8	G24	58.2295	1018603	1049028	1044405	1018222	4130258	87	1931.4	0	1	0	0	0	0	1.25358e-10	0	0	0
wild-type	3276.8	G25	10.7917	1017365	1047585	1042991	1017072	4125013	87	1931.4	0	1	2	0	0	0	3.76551e-10	0	0	0
wild-type	3276.8	G26	50.2652	1018603	1049028	1044405	1018222	4130258	87	1931.4	1	0	0	0	0	1	2.50715e-10	0	0	0
wild-type	3276.8	G27	64.3292	1018576	1049001	1044381	1018192	4130150	87	1931.4	0	1	0	1	0	0	2.50722e-10	0	0	0
wild-type	3276.8	G29	28.3882	1018603	1049028	1044405	1018222	4130258	87	1931.4	0	0	0	0	0	0	0	0	0	0
wild-type	3276.8	G31	139.502	1018603	1049028	1044405	1018222	4130258	87	1931.4	0	0	0	1	1	0	2.50715e-10	0	0	0
Sum of mutations											8	7	6	8	6	1	36	0	3
Pooled mutation rate											8.60379e-11	7.52831e-11	6.45284e-11	8.60379e-11	6.45284e-11	1.07547e-11	1.96239e-10			1.63533e-11
SEM											3.33809e-11	2.96531e-11	2.86911e-11	2.51197e-11	2.38061e-11	1.07533e-11	3.59993e-11			9.00092e-12
wild-type	26214.4	H1	72.3886	1114150	1150188	1145498	1114358	4524194	62	1413.6	0	1	0	0	0	0	1.56362e-10	0	0	0
wild-type	26214.4	H2	41.7121	1114150	1150188	1145498	1114358	4524194	62	1413.6	0	0	0	0	0	0	0	0	0	0
wild-type	26214.4	H3	43.0344	1114150	1150188	1145498	1114358	4524194	62	1413.6	0	0	0	0	0	0	0	0	0	0
wild-type	26214.4	H4	33.2108	1114150	1150188	1145498	1114358	4524194	62	1413.6	0	0	0	0	0	0	0	0	0	0
wild-type	26214.4	H5	63.6066	1112654	1148482	1143944	1112905	4517985	62	1413.6	0	0	0	1	1	1	4.69732e-10	0	0	0
wild-type	26214.4	H7	202.133	1114150	1150188	1145498	1114358	4524194	62	1413.6	0	0	0	0	0	0	0	0	0	0
wild-type	26214.4	H8	57.1064	1114150	1150188	1145498	1114358	4524194	62	1413.6	0	2	0	1	0	0	4.69087e-10	0	0	0
wild-type	26214.4	H9	138.75	1114150	1150188	1145498	1114358	4524194	62	1413.6	1	0	0	1	1	1	6.25449e-10	0	0	0
wild-type	26214.4	H10	83.1957	1114150	1150188	1145498	1114358	4524194	62	1413.6	0	0	0	0	0	0	0	0	0	0
wild-type	26214.4	H11	124.565	1114150	1150188	1145498	1114358	4524194	62	1413.6	1	0	0	0	0	0	1.56362e-10	0	0	0
wild-type	26214.4	H12	25.7582	1114148	1150183	1145494	1114356	4524181	62	1413.6	0	0	0	0	1	0	1.56363e-10	0	0	0
wild-type	26214.4	H13	90.8277	1114150	1150188	1145498	1114358	4524194	62	1413.6	0	0	0	0	0	0	0	0	0	0
wild-type	26214.4	H14	94.0143	1113087	1149373	1144631	1113366	4520457	62	1413.6	0	0	0	0	0	0	0	0	0	0
wild-type	26214.4	H15	120.248	1114150	1150188	1145498	1114358	4524194	62	1413.6	0	0	0	0	0	0	0	0	0	0
wild-type	26214.4	H16	59.5835	1114150	1150188	1145498	1114358	4524194	62	1413.6	0	0	0	1	0	0	1.56362e-10	0	0	0
wild-type	26214.4	H17	119.266	1114150	1150188	1145498	1114358	4524194	62	1413.6	0	0	0	0	0	0	0	0	0	0
wild-type	26214.4	H18	199.597	1114150	1150188	1145498	1114358	4524194	62	1413.6	0	0	0	0	0	0	0	0	0	0
wild-type	26214.4	H19	134.188	1109452	1146628	1141594	1109288	4506962	62	1413.6	0	1	0	0	1	0	3.1392e-10	0	1	1.5696e-10
wild-type	26214.4	H20	86.6952	1109153	1146446	1141360	1108972	4505931	62	1413.6	0	0	0	0	0	0	0	0	0	0
wild-type	26214.4	H21	122.637	1111176	1147777	1142975	1111246	4513174	62	1413.6	0	0	0	0	0	0	0	0	1	1.56744e-10
wild-type	26214.4	H23	136.508	1114150	1150188	1145498	1114358	4524194	62	1413.6	1	0	0	0	0	0	1.56362e-10	0	0	0
wild-type	26214.4	H24	128.623	1114150	1150188	1145498	1114358	4524194	62	1413.6	0	0	0	0	0	0	0	0	0	0
wild-type	26214.4	H25	120.173	1113996	1150002	1145299	1114262	4523559	62	1413.6	1	1	0	1	0	0	4.69153e-10	0	0	0
wild-type	26214.4	H26	132.472	1114150	1150188	1145498	1114358	4524194	62	1413.6	1	0	0	0	1	0	3.12725e-10	0	0	0
wild-type	26214.4	H27	103.661	1114150	1150188	1145498	1114358	4524194	62	1413.6	0	0	0	0	1	0	1.56362e-10	0	0	0
wild-type	26214.4	H28	86.932	1114150	1150188	1145498	1114358	4524194	62	1413.6	0	0	0	0	1	0	1.56362e-10	0	0	0
wild-type	26214.4	H29	101.159	1114150	1150188	1145498	1114358	4524194	62	1413.6	0	0	0	0	0	0	0	0	0	0
wild-type	26214.4	H30	115.655	1114150	1150188	1145498	1114358	4524194	62	1413.6	1	0	0	0	0	0	1.56362e-10	0	0	0
wild-type	26214.4	H31	69.9039	1114150	1150188	1145498	1114358	4524194	62	1413.6	0	0	0	0	0	0	0	0	0	0
wild-type	26214.4	H33	200.359	1114150	1150188	1145498	1114358	4524194	62	1413.6	1	0	0	2	0	0	4.69087e-10	0	0	0
wild-type	26214.4	H34	130.429	1113815	1150020	1145281	1114091	4523207	62	1413.6	0	0	0	0	0	0	0	0	0	0
wild-type	26214.4	H35	123.921	1114150	1150188	1145498	1114358	4524194	62	1413.6	0	0	0	0	0	0	0	0	1	1.56362e-10
wild-type	26214.4	H36	69.4279	1114150	1150188	1145498	1114358	4524194	62	1413.6	0	0	0	0	0	0	0	0	0	0
wild-type	26214.4	H37	204.608	1114150	1150187	1145497	1114358	4524192	62	1413.6	1	0	0	0	0	0	1.56362e-10	0	1	1.56362e-10
wild-type	26214.4	H38	143.292	1114150	1150188	1145498	1114358	4524194	62	1413.6	0	0	0	0	0	0	0	0	0	0
wild-type	26214.4	H39	138.334	1114150	1150188	1145498	1114358	4524194	62	1413.6	0	0	0	0	0	0	0	0	0	0
wild-type	26214.4	H40	116.226	1114150	1150188	1145498	1114358	4524194	62	1413.6	0	0	0	0	0	0	0	0	0	0
wild-type	26214.4	H41	146.885	1114147	1150187	1145497	1114354	4524185	62	1413.6	0	0	0	0	1	0	1.56363e-10	0	1	1.56363e-10
wild-type	26214.4	H42	127.022	1114150	1150188	1145498	1114358	4524194	62	1413.6	0	1	0	0	0	0	1.56362e-10	0	0	0
wild-type	26214.4	H43	66.1433	1114150	1150185	1145497	1114358	4524190	62	1413.6	1	0	0	0	0	0	1.56363e-10	0	0	0
wild-type	26214.4	H44	87.4146	1114150	1150188	1145498	1114358	4524194	62	1413.6	0	0	0	0	0	0	0	0	0	0
wild-type	26214.4	H45	69.873	1114150	1150188	1145498	1114358	4524194	62	1413.6	0	0	0	0	1	0	1.56362e-10	0	0	0
wild-type	26214.4	H46	127.734	1114150	1150188	1145498	1114358	4524194	62	1413.6	1	0	1	0	1	0	4.69087e-10	1	0	1.56362e-10
wild-type	26214.4	H47	101.397	1114150	1150188	1145498	1114358	4524194	62	1413.6	0	1	0	0	0	0	1.56362e-10	0	0	0
wild-type	26214.4	H48	82.2974	1114150	1150188	1145498	1114358	4524194	62	1413.6	0	0	0	0	0	0	0	0	1	1.56362e-10
Sum of mutations											10	7	1	7	10	2	37	1	6
Pooled mutation rate											6.84948e-11	4.93951e-11	7.05644e-12	4.79464e-11	7.05644e-11	1.3699e-11	1.28601e-10			2.433e-11
SEM											1.88982e-11	1.96432e-11	6.90246e-12	1.90624e-11	1.94788e-11	9.37427e-12	2.4941e-11			8.36721e-12
∆mutS	0	SA1	108.413	1105776	1141790	1137382	1106590	4491538	59	1410.1	19	56	1	0	0	0	1.19997e-08	13	7	3.1578e-09
∆mutS	0	SA2	181.22	1113515	1149543	1144886	1113754	4521698	59	1410.1	36	199	4	2	2	0	3.81114e-08	21	18	6.11664e-09
∆mutS	0	SA3	220.316	1113515	1149543	1144886	1113754	4521698	59	1410.1	27	102	1	0	2	1	2.08593e-08	13	18	4.86195e-09
∆mutS	0	SA6	137.579	1113499	1149510	1144872	1113716	4521597	59	1410.1	27	92	2	2	1	0	1.94482e-08	19	9	4.39153e-09
∆mutS	0	SA7	150.422	1113531	1149557	1144902	1113769	4521759	59	1410.1	24	162	2	1	3	0	3.01123e-08	20	27	7.37124e-09
∆mutS	0	SA8	214.269	1113515	1149543	1144886	1113753	4521697	59	1410.1	40	131	1	0	1	0	2.71328e-08	11	12	3.60725e-09
∆mutS	0	SA9	134.067	1113515	1149543	1144886	1113754	4521698	59	1410.1	36	117	0	1	1	0	2.43097e-08	12	8	3.13674e-09
∆mutS	0	SA10	190.233	1113513	1149542	1144886	1113758	4521699	59	1410.1	44	131	1	0	0	1	2.77601e-08	22	11	5.17562e-09
Sum of mutations											253	990	12	6	10	2	1273	131	110
Pooled mutation rate											9.7829e-09	3.94354e-08	4.78005e-10	2.32006e-10	3.98338e-10	7.73352e-11	2.49775e-08			4.72866e-09
SEM											9.40655e-10	4.90622e-09	1.34505e-10	9.68649e-11	1.16522e-10	5.05856e-11	2.76346e-09			5.26109e-10
∆mutS	6.4	SD1	91.3159	1114416	1150341	1145779	1114651	4525187	55	1303.5	29	118	1	0	1	0	2.52603e-08	18	11	4.91644e-09
∆mutS	6.4	SD2	111.404	1111408	1147484	1142918	1111539	4513349	55	1303.5	26	132	3	1	2	0	2.78762e-08	23	16	6.6291e-09
∆mutS	6.4	SD3	107.267	1114357	1150271	1145701	1114615	4524944	55	1303.5	23	119	0	1	58	0	3.40778e-08	10	13	3.89945e-09
∆mutS	6.4	SD4	68.1019	1114416	1150341	1145780	1114651	4525188	55	1303.5	8	99	0	3	2	1	1.91571e-08	10	12	3.72971e-09
∆mutS	6.4	SD5	117.211	1114416	1150341	1145780	1114651	4525188	55	1303.5	32	129	4	0	0	0	2.79728e-08	13	11	4.06877e-09
∆mutS	6.4	SD6	114.895	1114416	1150340	1145780	1114651	4525187	55	1303.5	28	65	1	0	0	0	1.5936e-08	9	8	2.88205e-09
∆mutS	6.4	SD7	106.992	1114436	1150371	1145800	1114670	4525277	55	1303.5	23	113	1	1	1	1	2.3734e-08	7	11	3.05152e-09
∆mutS	6.4	SD8	90.1557	1114415	1150340	1145779	1114651	4525185	55	1303.5	27	131	2	0	2	2	2.78033e-08	10	14	4.06878e-09
∆mutS	6.4	SD9	83.8204	1114405	1150321	1145760	1114637	4525123	55	1303.5	33	127	1	0	2	1	2.78037e-08	17	15	5.42511e-09
∆mutS	6.4	SD10	61.8696	1114379	1150327	1145754	1114604	4525064	55	1303.5	18	100	1	1	2	1	2.0853e-08	13	14	4.5775e-09
Sum of mutations											247	1133	14	7	70	6	1477	130	125
Pooled mutation rate											8.25473e-09	3.90048e-08	4.81966e-10	2.3394e-10	2.40983e-09	2.0052e-10	2.50467e-08			4.32424e-09
SEM											7.78225e-10	2.19337e-09	1.33757e-10	1.00244e-10	1.89538e-09	7.38754e-11	1.66792e-09			3.5439e-10
∆mutS	51.2	SE1	109.432	1114646	1150425	1145897	1114846	4525814	56	1321.6	17	84	0	1	1	0	1.72203e-08	4	4	1.3375e-09
∆mutS	51.2	SE2	88.2667	1114602	1150361	1145834	1114786	4525583	56	1321.6	28	102	0	0	3	1	2.24042e-08	15	12	4.51429e-09
∆mutS	51.2	SE3	114.249	1114629	1150405	1145879	1114836	4525749	56	1321.6	28	126	0	1	1	0	2.60816e-08	16	11	4.51412e-09
∆mutS	51.2	SE4	141.068	1114646	1150425	1145896	1114846	4525813	56	1321.6	31	115	2	0	0	0	2.47437e-08	10	10	3.34375e-09
∆mutS	51.2	SE5	88.4703	1114646	1150427	1145896	1114848	4525817	56	1321.6	28	93	2	0	1	0	2.07312e-08	11	6	2.84218e-09
∆mutS	51.2	SE6	18.507	1114621	1150385	1145865	1114822	4525693	56	1321.6	25	120	1	0	4	0	2.50788e-08	12	11	3.84541e-09
∆mutS	51.2	SE7	54.6452	1114643	1150422	1145889	1114842	4525796	56	1321.6	27	114	0	2	2	0	2.42423e-08	8	5	2.17344e-09
∆mutS	51.2	SE8	110.341	1114646	1150425	1145896	1114846	4525813	56	1321.6	24	102	1	0	1	1	2.15672e-08	8	11	3.17656e-09
∆mutS	51.2	SE9	103.767	1114645	1150425	1145897	1114847	4525814	56	1321.6	18	86	4	1	3	1	1.88922e-08	7	10	2.84218e-09
Sum of mutations											226	942	10	5	16	3	1202	91	80
Pooled mutation rate											8.27443e-09	3.55227e-08	3.77099e-10	1.83063e-10	6.03359e-10	1.09838e-10	2.2329e-08			3.17659e-09
SEM											5.22302e-10	1.7017e-09	1.54333e-10	7.97946e-11	1.47264e-10	5.49192e-11	1.00128e-09			3.46929e-10
∆mutS	409.6	SF1	181.009	1114750	1150718	1146070	1114987	4526525	88	2050.4	34	140	1	1	2	0	1.91786e-08	20	14	3.66332e-09
∆mutS	409.6	SF3	164.495	1114490	1150423	1145719	1114811	4525443	88	2050.4	45	142	4	0	1	2	2.09075e-08	20	25	4.84968e-09
∆mutS	409.6	SF6	86.8623	1114752	1150721	1146050	1114981	4526504	88	2050.4	42	134	2	1	2	1	1.96097e-08	18	8	2.80138e-09
∆mutS	409.6	SF7	140.22	1114753	1150722	1146051	1114980	4526506	88	2050.4	40	174	4	1	1	2	2.39195e-08	15	17	3.44785e-09
∆mutS	409.6	SF9	248.995	1114762	1150737	1146070	1114985	4526554	88	2050.4	48	198	1	1	4	0	2.71515e-08	25	22	5.06398e-09
Sum of mutations											209	788	12	4	10	5	1028	98	86
Pooled mutation rate											8.8765e-09	3.44731e-08	5.24972e-10	1.69885e-10	4.37476e-10	2.12356e-10	2.21534e-08			3.9652e-09
SEM											5.04458e-10	2.68346e-09	1.4837e-10	4.24689e-11	1.19799e-10	9.49769e-11	1.49954e-09			4.30283e-10
∆mutS	3276.8	SG1	87.6634	1114813	1150755	1146161	1115009	4526738	87	1992.3	36	146	4	2	3	1	2.12893e-08	17	14	3.43733e-09
∆mutS	3276.8	SG3	133.145	1114809	1150753	1146162	1115006	4526730	87	1992.3	35	80	0	1	58	1	1.94043e-08	10	12	2.4394e-09
∆mutS	3276.8	SG4	71.0571	1114813	1150753	1146161	1115008	4526735	87	1992.3	39	137	3	1	2	1	2.02914e-08	13	13	2.88293e-09
∆mutS	3276.8	SG5	110.43	1114836	1150784	1146197	1115026	4526843	87	1992.3	51	120	1	0	3	0	1.94038e-08	12	9	2.32846e-09
∆mutS	3276.8	SG7	97.7381	1114789	1150718	1146144	1114985	4526636	87	1992.3	32	144	0	2	1	1	1.99592e-08	13	15	3.10476e-09
∆mutS	3276.8	SG8	116.479	1114813	1150755	1146163	1115009	4526740	87	1992.3	43	79	0	0	0	2	1.37493e-08	14	12	2.88292e-09
∆mutS	3276.8	SG9	92.5668	1114811	1150755	1146163	1115009	4526738	87	1992.3	41	177	3	2	0	0	2.47266e-08	19	24	4.76791e-09
Sum of mutations											277	883	11	8	67	6	1252	98	99
Pooled mutation rate											8.64732e-09	2.83948e-08	3.53729e-10	2.49742e-10	2.15453e-09	1.87307e-10	1.9832e-08			3.12053e-09
SEM											5.17639e-10	3.06897e-09	1.46188e-10	7.43138e-11	1.82003e-09	5.69957e-11	1.23127e-09			3.09327e-10
∆mutS	26214.4	SH1	123.522	1100186	1137333	1132848	1100292	4470659	62	1419.8	25	46	0	2	1	0	1.16582e-08	12	8	3.15088e-09
∆mutS	26214.4	SH2	124.986	1100318	1137518	1133029	1100437	4471302	62	1419.8	6	9	1	0	1	0	2.67786e-09	1	2	4.72563e-10
∆mutS	26214.4	SH8	116.011	1100178	1137328	1132840	1100288	4470634	62	1419.8	25	61	0	1	3	0	1.4179e-08	13	6	2.99335e-09
∆mutS	26214.4	SH10	48.7519	1100177	1137328	1132843	1100289	4470637	62	1419.8	19	70	2	0	2	0	1.46516e-08	11	9	3.15089e-09
∆mutS	26214.4	SH11	139.62	1099963	1137211	1132674	1100060	4469908	62	1419.8	18	38	0	2	0	1	9.29665e-09	9	9	2.83626e-09
∆mutS	26214.4	SH12	74.9239	1099130	1136053	1131349	1099155	4465687	62	1419.8	30	46	0	0	0	0	1.19867e-08	9	6	2.36579e-09
∆mutS	26214.4	SH14	98.7431	1100190	1137340	1132857	1100302	4470689	62	1419.8	16	45	0	0	0	1	9.76765e-09	6	3	1.41788e-09
∆mutS	26214.4	SH15	62.6175	1100178	1137328	1132841	1100287	4470634	62	1419.8	22	45	3	0	1	0	1.11857e-08	8	8	2.52071e-09
∆mutS	26214.4	SH16	120.492	1100173	1137320	1132833	1100283	4470609	62	1419.8	20	52	0	0	0	0	1.13433e-08	14	13	4.25373e-09
Sum of mutations											181	412	6	5	8	2	614	83	64
Pooled mutation rate											6.24032e-09	1.46542e-08	2.13411e-10	1.72385e-10	2.84548e-10	6.89538e-11	1.07494e-08			2.57355e-09
SEM											7.04865e-10	1.79785e-09	1.19286e-10	9.12106e-11	1.12464e-10	4.56053e-11	1.16734e-09			3.63825e-10

## Sheet: S2
Table S2. List of base-pair substitutions
Samples	Genomic position	Base-substitution	Gene region	Reading frame	Strand	Codon change	Amino acid change	Gene	synonymous/nonsynonymous
Sample_A1	NC_000913:204568	G>A	EX	204493:205089	+	GCG>ACG	A>T	rnhB	nonsyn
Sample_A1	NC_000913:2071338	T>C	IG
Sample_A1	NC_000913:3742615	C>A	IG
Sample_A2	NC_000913:1121526	T>C	IG
Sample_A2	NC_000913:4404599	A>T	IG
Sample_A2	NC_000913:4580328	C>T	EX	4580068:4581462	-	GCC>ACC	A>T	hsdS	nonsyn
Sample_A3	NC_000913:1893444	T>A	EX	1893367:1893711	+	GGT>GGA	G>G	yoaB	syn
Sample_A3	NC_000913:4476088	A>G	EX	4475437:4477251	+	AAT>GAT	N>D	yjgL	nonsyn
Sample_A4	NC_000913:641526	G>A	EX	641439:641867	-	CGC>CGT	R>R	uspG	syn
Sample_A4	NC_000913:1788273	T>C	EX	1787445:1788278	+	TAC>CAC	Y>H	ppsR	nonsyn
Sample_A7	NC_000913:961967	A>G	IG
Sample_A7	NC_000913:1582573	A>G	IG
Sample_A7	NC_000913:1688339	T>A	EX	1686731:1688377	-	CCA>CCT	P>P	fumA	syn
Sample_A7	NC_000913:4560755	A>G	IG
Sample_A8	NC_000913:2923096	G>T	EX	2923002:2923784	-	GCG>GAG	A>E	truC	nonsyn
Sample_A8	NC_000913:3308682	C>A	EX	3308040:3308924	-	GCG>GCT	A>A	nlpI	syn
Sample_A9	NC_000913:2188157	A>G	EX	2187380:2188414	-	TTT>TTC	F>F	yehA	syn
Sample_A10	NC_000913:2283229	A>G	EX	2282940:2283947	-	ATC>ACC	I>T	yejK	nonsyn
Sample_A10	NC_000913:2908324	A>G	EX	2908029:2909666	-	TTG>TCG	L>S	pyrG	nonsyn
Sample_A11	NC_000913:326274	T>C	EX	325577:327247	-	AAA>AGA	K>R	betA	nonsyn
Sample_A11	NC_000913:443250	T>G	EX	443051:443641	-	AAA>ACA	K>T	yajL	nonsyn
Sample_A11	NC_000913:656324	T>C	IG
Sample_A11	NC_000913:4260995	G>T	EX	4260599:4261306	+	GAA>TAA	E>*	yjbM	nonsyn
Sample_A12	NC_000913:646659	A>T	EX	646631:647509	-	ATC>AAC	I>N	citG	nonsyn
Sample_A12	NC_000913:2301291	G>A	EX	2300267:2302753	-	CCG>CTG	P>L	napA	nonsyn
Sample_A13	NC_000913:259735	C>T	EX	259045:260100	-	GTG>GTA	V>V	phoE	syn
Sample_A13	NC_000913:778444	T>G	EX	777740:779032	+	GCT>GCG	A>A	tolB	syn
Sample_A13	NC_000913:938128	C>T	EX	937994:939337	+	ATC>ATT	I>I	rarA	syn
Sample_A13	NC_000913:2254986	C>T	EX	2254245:2255186	-	ATG>ATA	M>I	rihB	nonsyn
Sample_A14	NC_000913:1310977	A>G	IG
Sample_A14	NC_000913:1453817	T>C	IG
Sample_A14	NC_000913:3971491	G>A	EX	3971260:3972522	+	GCC>ACC	A>T	wecC	nonsyn
Sample_A14	NC_000913:4254799	C>T	EX	4254043:4256466	-	ATG>ATA	M>I	plsB	nonsyn
Sample_A15	NC_000913:2216439	G>A	EX	2215745:2216476	-	GCT>GTT	A>V	yehW	nonsyn
Sample_A16	NC_000913:3694647	A>C	EX	3692618:3695236	-	TTC>TGC	F>C	bcsA	nonsyn
Sample_A17	NC_000913:1197977	G>T	EX	1197533:1198237	-	AAC>AAA	N>K	ymfE	nonsyn
Sample_A18	NC_000913:535480	C>A	EX	533916:535697	+	GCT>GAT	A>D	gcl	nonsyn
Sample_A18	NC_000913:1203006	A>G	IG
Sample_A18	NC_000913:4236327	G>A	EX	4236262:4236900	+	GAG>GAA	E>E	yjbF	syn
Sample_A19	NC_000913:664202	A>C	EX	664102:665190	-	ATC>AGC	I>S	rlpA	nonsyn
Sample_A19	NC_000913:1501285	T>G	EX	1500573:1501565	+	CTG>CGG	L>R	tehA	nonsyn
Sample_A20	NC_000913:4527650	T>A	EX	4527549:4527980	-	ACC>TCC	T>S	sgcA	nonsyn
Sample_A21	NC_000913:488208	T>A	EX	486536:489898	+	ATC>AAC	I>N	mscK	nonsyn
Sample_A21	NC_000913:4363716	G>A	EX	4363345:4365042	-	CAA>TAA	Q>*	dsbD	nonsyn
Sample_A23	NC_000913:454609	T>A	EX	454472:454789	+	GAT>GAA	D>E	bolA	nonsyn
Sample_A23	NC_000913:2142850	A>T	EX	2142307:2142948	-	CGT>CGA	R>R	udk	syn
Sample_A25	NC_000913:561158	T>G	EX	559697:562300	+	TAC>GAC	Y>D	sfmD	nonsyn
Sample_A25	NC_000913:1093624	A>G	EX	1092876:1094234	+	TAT>TGT	Y>C	ycdT	nonsyn
Sample_A25	NC_000913:2245248	T>C	EX	2244778:2246769	-	ACG>GCG	T>A	cirA	nonsyn
Sample_A25	NC_000913:2560468	A>G	EX	2560257:2560898	+	GAA>GGA	E>G	yffL	nonsyn
Sample_A25	NC_000913:3744604	G>C	EX	3744328:3744801	+	GGC>CGC	G>R	yiaM	nonsyn
Sample_A26	NC_000913:29216	T>C	IG
Sample_A26	NC_000913:380020	G>C	IG
Sample_A26	NC_000913:1212185	G>A	IG
Sample_A26	NC_000913:1216000	C>T	EX	1215789:1216025	+	GCA>GTA	A>V	ycgZ	nonsyn
Sample_A26	NC_000913:1235364	G>T	EX	1234938:1235657	+	GAG>TAG	E>*	fadR	nonsyn
Sample_A26	NC_000913:2021731	A>C	EX	2021504:2021869	+	GCA>GCC	A>A	fliO	syn
Sample_A26	NC_000913:2757827	T>C	EX	2757644:2758600	-	GAA>GAG	E>E	yfjH	syn
Sample_A28	NC_000913:3851490	G>T	EX	3851096:3852784	-	GCG>GAG	A>E	ilvB	nonsyn
Sample_A28	NC_000913:4545942	T>G	EX	4545096:4547732	+	TTG>GTG	L>V	fimD	nonsyn
Sample_A29	NC_000913:1322352	C>T	EX	1321384:1322946	-	GCT>ACT	A>T	trpE	nonsyn
Sample_A29	NC_000913:2731530	A>G	IG
Sample_A29	NC_000913:3874341	G>A	EX	3873596:3874474	-	GCG>GTG	A>V	dgoK	nonsyn
Sample_A29	NC_000913:4370742	A>G	EX	4370688:4370981	+	ACT>GCT	T>A	groS	nonsyn
Sample_A30	NC_000913:1690223	T>G	EX	1689852:1691360	+	AAT>AAG	N>K	ydgA	nonsyn
Sample_A30	NC_000913:1813097	A>G	EX	1812329:1813132	-	GGT>GGC	G>G	ydjO	syn
Sample_A30	NC_000913:2031107	G>A	EX	2030899:2032317	-	CCT>CTT	P>L	dcm	nonsyn
Sample_A30	NC_000913:2144023	A>C	EX	2143266:2146583	+	GAT>GCT	D>A	yegE	nonsyn
Sample_A30	NC_000913:2346505	T>G	EX	2344865:2347150	+	ATT>ATG	I>M	nrdA	nonsyn
Sample_A30	NC_000913:3147756	T>C	IG
Sample_A30	NC_000913:3269510	G>A	EX	3268415:3269602	+	GAA>AAA	E>K	yhaC	nonsyn
Sample_A30	NC_000913:3889305	T>G	EX	3888730:3890145	+	GTT>GTG	V>V	tnaA	syn
Sample_A31	NC_000913:66236	C>T	EX	65855:66550	-	GCG>GCA	A>A	araD	syn
Sample_A31	NC_000913:124571	A>G	EX	123017:125680	+	ATC>GTC	I>V	aceE	nonsyn
Sample_A31	NC_000913:2230480	C>A	IG
Sample_A31	NC_000913:2886909	G>A	EX	2884553:2887219	-	CCA>CTA	P>L	ygcB	nonsyn
Sample_A32	NC_000913:121649	T>C	IG
Sample_A32	NC_000913:140014	C>A	EX	138835:141225	-	TGG>TGT	W>C	gcd	nonsyn
Sample_A32	NC_000913:1168022	T>G	EX	1167599:1168138	+	TAT>GAT	Y>D	ycfJ	nonsyn
Sample_A32	NC_000913:1333672	A>G	IG
Sample_A32	NC_000913:3789686	G>A	EX	3789047:3790081	-	ACC>ACT	T>T	waaH	syn
Sample_D1	NC_000913:131365	A>G	IG
Sample_D1	NC_000913:2355882	T>A	EX	2355521:2356711	+	GTG>GAG	V>E	glpC	nonsyn
Sample_D1	NC_000913:2710255	T>C	IG
Sample_D2	NC_000913:927659	T>G	EX	927474:929195	-	ATC>CTC	I>L	cydC	nonsyn
Sample_D2	NC_000913:1934809	T>C	IG
Sample_D2	NC_000913:2782334	A>C	EX	2778146:2782726	-	GGT>GGG	G>G	ypjA	syn
Sample_D2	NC_000913:4392453	C>T	IG
Sample_D2	NC_000913:4392456	A>G	IG
Sample_D2	NC_000913:4437423	G>A	EX	4436755:4437495	+	TGG>TGA	W>*	cysQ	nonsyn
Sample_D2	NC_000913:4518076	T>C	EX	4517714:4518235	-	ACG>GCG	T>A	fecI	nonsyn
Sample_D2	NC_000913:4623285	C>T	EX	4623101:4624117	-	CGC>CAC	R>H	lplA	nonsyn
Sample_D3	NC_000913:2043305	C>T	IG
Sample_D3	NC_000913:2500781	G>C	EX	2500383:2501117	+	ACG>ACC	T>T	ypdB	syn
Sample_D3	NC_000913:2949309	A>T	EX	2949242:2950573	+	CAC>CTC	H>L	argA	nonsyn
Sample_D3	NC_000913:4196410	C>A	EX	4196332:4196808	-	GCG>GCT	A>A	rsd	syn
Sample_D3	NC_000913:4640081	C>T	EX	4639590:4640306	-	GCG>ACG	A>T	arcA	nonsyn
Sample_D4	NC_000913:3183212	G>C	EX	3182550:3183323	+	ATG>ATC	M>I	zupT	nonsyn
Sample_D4	NC_000913:4420154	T>G	EX	4419980:4421377	+	TCC>GCC	S>A	ulaA	nonsyn
Sample_D5	NC_000913:2209765	T>C	IG
Sample_D5	NC_000913:2747522	T>G	EX	2746434:2747795	-	ACC>CCC	T>P	ffh	nonsyn
Sample_D5	NC_000913:2818145	T>C	IG
Sample_D5	NC_000913:2818183	A>G	IG
Sample_D5	NC_000913:3730281	A>G	EX	3729443:3730765	-	GTC>GCC	V>A	xylA	nonsyn
Sample_D7	NC_000913:1035985	A>G	EX	1035770:1036357	+	GAA>GAG	E>E	hyaD	syn
Sample_D8	NC_000913:3862522	T>C	IG
Sample_D8	NC_000913:4221360	A>C	EX	4220301:4222487	-	ACT>ACG	T>T	arpA	syn
Sample_D9	NC_000913:1343318	G>A	EX	1343110:1343328	-	ACG>ATG	T>M	osmB	nonsyn
Sample_D9	NC_000913:1902994	A>T	EX	1902048:1903019	+	GAT>GTT	D>V	manX	nonsyn
Sample_D9	NC_000913:4078752	G>A	IG
Sample_D10	NC_000913:2074414	T>G	EX	2071539:2074658	+	GTA>GGA	V>G	flu	nonsyn
Sample_D10	NC_000913:4216820	C>T	EX	4215478:4217079	+	GCG>GTG	A>V	aceB	nonsyn
Sample_D11	NC_000913:308154	A>G	EX	306807:309332	-	GGT>GGC	G>G	ecpC	syn
Sample_D11	NC_000913:745954	T>A	EX	745935:746726	+	ATC>AAC	I>N	nei	nonsyn
Sample_D11	NC_000913:2919443	G>C	EX	2919406:2920746	-	ACC>AGC	T>S	gudX	nonsyn
Sample_D11	NC_000913:3340340	G>A	EX	3340275:3341252	+	CTG>CTA	L>L	yrbG	syn
Sample_D13	NC_000913:1900446	A>T	EX	1900029:1901585	-	GAT>GAA	D>E	yoaE	nonsyn
Sample_D15	NC_000913:2286258	T>G	IG
Sample_D15	NC_000913:2423877	T>G	EX	2423736:2424509	-	GAA>GAC	E>D	hisP	nonsyn
Sample_D15	NC_000913:4393861	C>T	EX	4392928:4394067	-	TTG>TTA	L>L	queG	syn
Sample_D16	NC_000913:185615	T>C	EX	185123:185947	-	GTA>GTG	V>V	dapD	syn
Sample_D16	NC_000913:3854657	A>C	EX	3853922:3855106	+	AGT>CGT	S>R	emrD	nonsyn
Sample_D18	NC_000913:1923882	A>G	EX	1923719:1924591	-	ATG>ACG	M>T	yebZ	nonsyn
Sample_D18	NC_000913:2365246	C>T	EX	2365018:2365620	-	ACG>ACA	T>T	ais	syn
Sample_D19	NC_000913:231257	A>T	EX	231122:231922	+	ATC>TTC	I>F	yafD	nonsyn
Sample_D19	NC_000913:1826673	A>C	EX	1825955:1826923	-	ATC>AGC	I>S	astE	nonsyn
Sample_D19	NC_000913:2180834	C>G	EX	2180095:2181099	+	ACC>AGC	T>S	yegU	nonsyn
Sample_D19	NC_000913:2590032	G>A	EX	2587595:2590708	+	CGT>CAT	R>H	acrD	nonsyn
Sample_D20	NC_000913:1829355	G>A	EX	1828256:1829734	-	GCG>GTG	A>V	astD	nonsyn
Sample_D21	NC_000913:2741265	G>T	IG
Sample_D21	NC_000913:2924706	A>T	IG
Sample_D23	NC_000913:816861	A>G	IG
Sample_D23	NC_000913:3267190	A>G	IG
Sample_D23	NC_000913:4441569	C>T	EX	4441538:4442176	-	GGA>GAA	G>E	msrA	nonsyn
Sample_D24	NC_000913:142599	C>A	EX	142008:142670	-	GGG>GGT	G>G	can	syn
Sample_D24	NC_000913:561736	G>T	EX	559697:562300	+	TGG>TGT	W>C	sfmD	nonsyn
Sample_D24	NC_000913:1101272	A>G	EX	1100851:1101684	-	GTT>GCT	V>A	csgG	nonsyn
Sample_D24	NC_000913:1171918	T>G	EX	1170518:1173964	-	ATC>CTC	I>L	mfd	nonsyn
Sample_D24	NC_000913:4331418	T>C	EX	4330502:4332004	+	ATC>ACC	I>T	proP	nonsyn
Sample_D24	NC_000913:4392564	T>C	IG
Sample_D24	NC_000913:4572344	A>G	IG
Sample_D25	NC_000913:550900	G>A	EX	550439:551332	+	GTG>GTA	V>V	ybcF	syn
Sample_D25	NC_000913:1345192	G>A	EX	1344757:1346742	-	CTC>CTT	L>L	gmr	syn
Sample_D25	NC_000913:1474227	A>T	EX	1474221:1475081	+	AGC>TGC	S>C	ydbC	nonsyn
Sample_D25	NC_000913:1485176	G>A	EX	1483061:1486963	+	GAA>AAA	E>K	hrpA	nonsyn
Sample_D25	NC_000913:3487876	A>G	EX	3486791:3488893	+	TCA>TCG	S>S	yhfK	syn
Sample_D25	NC_000913:3596361	C>A	EX	3595477:3596403	-	GGC>TGC	G>C	livH	nonsyn
Sample_D25	NC_000913:3951768	G>A	IG
Sample_D25	NC_000913:4617254	C>T	IG
Sample_D27	NC_000913:1991418	A>G	EX	1990954:1991619	-	TCA>CCA	S>P	yecA	nonsyn
Sample_D27	NC_000913:2756390	T>G	EX	2756159:2757400	+	TCT>GCT	S>A	intA	nonsyn
Sample_D29	NC_000913:177434	T>A	EX	177001:177624	-	GAT>GTT	D>V	yadS	nonsyn
Sample_D29	NC_000913:345402	C>T	IG
Sample_D29	NC_000913:2178505	A>G	EX	2177512:2178564	-	TGT>TGC	C>C	fbaB	syn
Sample_D29	NC_000913:4268511	A>C	IG
Sample_D30	NC_000913:1047833	C>G	EX	1045849:1047945	-	GGC>GCC	G>A	gfcD	nonsyn
Sample_D30	NC_000913:1202275	T>C	EX	1202259:1202933	-	TAC>TGC	Y>C	cohE	nonsyn
Sample_D30	NC_000913:1404361	A>G	EX	1403255:1404565	-	TTC>CTC	F>L	abgA	nonsyn
Sample_D30	NC_000913:1917245	A>T	EX	1916258:1917541	+	ATC>TTC	I>F	yebS	nonsyn
Sample_D30	NC_000913:2201336	G>C	EX	2200279:2203911	+	CGC>CCC	R>P	yehI	nonsyn
Sample_D30	NC_000913:3602093	C>A	EX	3602079:3602747	-	GTG>TTG	V>L	ftsE	nonsyn
Sample_D31	NC_000913:1026791	G>A	EX	1026557:1027015	-	GGC>GGT	G>G	mgsA	syn
Sample_D31	NC_000913:1847768	C>G	EX	1846965:1848008	-	GGC>CGC	G>R	selD	nonsyn
Sample_D31	NC_000913:3152632	G>T	EX	3152236:3153423	+	GAT>TAT	D>Y	metC	nonsyn
Sample_E1	NC_000913:2626430	T>G	EX	2625115:2626656	+	TTG>TGG	L>W	ppx	nonsyn
Sample_E1	NC_000913:3000964	T>G	EX	3000345:3002603	+	ATC>AGC	I>S	xdhA	nonsyn
Sample_E1	NC_000913:3270348	T>G	IG
Sample_E1	NC_000913:4379253	A>C	EX	4379007:4379366	-	ATT>ATG	I>M	frdD	nonsyn
Sample_E3	NC_000913:2499373	A>T	EX	2498671:2500368	+	ATC>TTC	I>F	ypdA	nonsyn
Sample_E6	NC_000913:2146228	A>G	EX	2143266:2146583	+	GAT>GGT	D>G	yegE	nonsyn
Sample_E6	NC_000913:3077045	A>C	EX	3076179:3077456	-	TAT>GAT	Y>D	yggP	nonsyn
Sample_E7	NC_000913:2863421	A>G	EX	2862335:2863501	+	ACC>GCC	T>A	ygbK	nonsyn
Sample_E8	NC_000913:314266	A>G	IG
Sample_E8	NC_000913:1434568	T>G	IG
Sample_E8	NC_000913:3208419	G>A	EX	3208024:3209487	+	AAG>AAA	K>K	ttdT	syn
Sample_E9	NC_000913:1174184	C>T	EX	1174092:1175165	-	GGC>AGC	G>S	ycfT	nonsyn
Sample_E9	NC_000913:2718889	A>C	EX	2718735:2719154	+	GAT>GCT	D>A	trxC	nonsyn
Sample_E9	NC_000913:4397045	G>A	EX	4396065:4397402	+	CAG>CAA	Q>Q	amiB	syn
Sample_E10	NC_000913:107536	A>G	IG
Sample_E10	NC_000913:754482	A>C	IG
Sample_E10	NC_000913:1773221	C>A	EX	1772512:1773777	+	CCC>CAC	P>H	ydiN	nonsyn
Sample_E10	NC_000913:3464142	A>C	EX	3463922:3465085	+	AAA>ACA	K>T	gspL	nonsyn
Sample_E11	NC_000913:1741037	C>A	EX	1739911:1741122	+	GCG>GAG	A>E	ydhC	nonsyn
Sample_E11	NC_000913:4522358	T>A	EX	4522127:4524094	-	GAA>GAT	E>D	yjhG	nonsyn
Sample_E12	NC_000913:388326	G>A	EX	387795:388646	+	GTC>ATC	V>I	tauD	nonsyn
Sample_E13	NC_000913:650352	C>T	EX	649582:650490	-	GTA>ATA	V>I	citE	nonsyn
Sample_E13	NC_000913:952379	G>A	EX	951272:953554	-	TCC>TCT	S>S	pflB	syn
Sample_E13	NC_000913:2684006	G>C	EX	2682863:2684056	+	GTG>CTG	V>L	yphH	nonsyn
Sample_E13	NC_000913:2784292	A>T	IG
Sample_E13	NC_000913:2825583	T>G	IG
Sample_E14	NC_000913:170307	C>A	EX	169778:170575	+	GCG>GAG	A>E	fhuC	nonsyn
Sample_E14	NC_000913:396139	C>T	EX	395130:396287	-	GGG>GAG	G>E	ampH	nonsyn
Sample_E14	NC_000913:1673412	T>C	EX	1673136:1673501	-	GGA>GGG	G>G	mdtJ	syn
Sample_E14	NC_000913:1696526	G>T	EX	1696462:1697052	-	GCG>GAG	A>E	uidR	nonsyn
Sample_E14	NC_000913:2523229	G>T	EX	2522729:2523985	-	CCC>ACC	P>T	xapB	nonsyn
Sample_E14	NC_000913:2798556	T>A	IG
Sample_E14	NC_000913:3199380	G>A	EX	3196801:3199641	-	CGC>TGC	R>C	glnE	nonsyn
Sample_E15	NC_000913:2108290	C>T	EX	2107226:2108329	-	GCC>ACC	A>T	glf	nonsyn
Sample_E17	NC_000913:1475641	T>G	EX	1475144:1477450	+	ATT>ATG	I>M	ydbD	nonsyn
Sample_E17	NC_000913:1531054	G>A	IG
Sample_E19	NC_000913:993383	C>G	EX	993277:994044	-	CGT>CCT	R>P	ssuB	nonsyn
Sample_E19	NC_000913:1718561	T>G	EX	1718493:1719602	-	AAT>CAT	N>H	anmK	nonsyn
Sample_E19	NC_000913:4095344	G>A	EX	4094723:4095982	-	AGC>AGT	S>S	rhaA	syn
Sample_E21	NC_000913:339613	T>A	EX	338325:339743	+	CTG>CAG	L>Q	yahG	nonsyn
Sample_E22	NC_000913:1902994	A>T	EX	1902048:1903019	+	GAT>GTT	D>V	manX	nonsyn
Sample_E22	NC_000913:4216201	A>G	EX	4215478:4217079	+	ACC>GCC	T>A	aceB	nonsyn
Sample_E23	NC_000913:1647192	A>T	IG
Sample_E23	NC_000913:3171649	G>C	EX	3170484:3171833	+	GGC>GCC	G>A	qseC	nonsyn
Sample_E23	NC_000913:3473593	A>C	EX	3473542:3474081	-	AGT>AGG	S>R	rpsG	nonsyn
Sample_E24	NC_000913:573840	C>T	EX	573730:573870	+	TAC>TAT	Y>Y	ylcG	syn
Sample_E24	NC_000913:902513	G>T	EX	902257:902988	-	GCA>GAA	A>E	artI	nonsyn
Sample_E24	NC_000913:1491310	C>G	EX	1490902:1491432	+	CAT>GAT	H>D	cybB	nonsyn
Sample_E24	NC_000913:2685802	A>G	IG
Sample_E25	NC_000913:151532	G>A	EX	151003:151599	-	GCC>GTC	A>V	yadK	nonsyn
Sample_E25	NC_000913:708901	T>G	EX	708334:709740	+	TTC>GTC	F>V	chiP	nonsyn
Sample_E25	NC_000913:4131429	T>G	EX	4129835:4132267	+	TTC>TGC	F>C	metL	nonsyn
Sample_E26	NC_000913:2108702	T>G	EX	2108337:2109584	-	ACC>CCC	T>P	wzxB	nonsyn
Sample_E26	NC_000913:2127183	T>G	EX	2126225:2127190	-	AAA>ACA	K>T	wcaG	nonsyn
Sample_E26	NC_000913:4129477	A>T	EX	4128672:4129832	+	CAG>CTG	Q>L	metB	nonsyn
Sample_E26	NC_000913:4405877	G>A	EX	4404687:4405985	+	CTG>CTA	L>L	purA	syn
Sample_E27	NC_000913:1408135	T>C	EX	1408050:1409033	+	CTG>CCG	L>P	ydaN	nonsyn
Sample_E29	NC_000913:3055465	A>G	IG
Sample_E29	NC_000913:4084624	T>G	EX	4082772:4085822	-	CAC>CCC	H>P	fdoG	nonsyn
Sample_E30	NC_000913:1176125	C>T	EX	1175427:1176626	+	GAC>GAT	D>D	lolC	syn
Sample_E30	NC_000913:3117026	A>C	EX	3114550:3119112	-	CTG>CGG	L>R	sslE	nonsyn
Sample_E31	NC_000913:1169769	A>T	EX	1169412:1170374	-	GGT>GGA	G>G	ldtC	syn
Sample_E31	NC_000913:1645403	A>C	EX	1645346:1645633	-	TCT>TCG	S>S	relE	syn
Sample_E31	NC_000913:2185855	T>C	IG
Sample_E32	NC_000913:297141	G>T	IG
Sample_E32	NC_000913:476775	C>T	EX	476672:477025	+	GCG>GTG	A>V	ybaA	nonsyn
Sample_E32	NC_000913:2338174	T>G	EX	2336793:2339420	-	CAG>CCG	Q>P	gyrA	nonsyn
Sample_E32	NC_000913:3998680	T>C	EX	3997983:4000145	+	ATC>ACC	I>T	uvrD	nonsyn
Sample_F1	NC_000913:648706	A>T	EX	648039:649571	-	CTG>CAG	L>Q	citF	nonsyn
Sample_F1	NC_000913:1879393	T>C	IG
Sample_F4	NC_000913:1381870	T>G	IG
Sample_F6	NC_000913:2370757	A>T	EX	2370018:2370908	+	GAT>GTT	D>V	arnD	nonsyn
Sample_F7	NC_000913:2370757	A>T	EX	2370018:2370908	+	GAT>GTT	D>V	arnD	nonsyn
Sample_F10	NC_000913:1138663	G>A	EX	1138378:1140021	+	GAC>AAC	D>N	flgK	nonsyn
Sample_F10	NC_000913:2936575	C>A	EX	2935584:2937359	+	CCC>CAC	P>H	fucI	nonsyn
Sample_F11	NC_000913:3385421	T>C	IG
Sample_F13	NC_000913:1863080	G>A	EX	1862771:1863766	+	GAA>AAA	E>K	gapA	nonsyn
Sample_F14	NC_000913:1119421	T>G	EX	1119307:1119447	-	TTA>TTC	L>F	yceO	nonsyn
Sample_F14	NC_000913:1831648	G>A	EX	1830762:1831982	-	GCG>GTG	A>V	astC	nonsyn
Sample_F14	NC_000913:3447074	A>T	EX	3446899:3447438	+	TTC>TCC	F>S	dusB	nonsyn
Sample_F14	NC_000913:3753314	C>T	EX	3752963:3754099	+	CGT>CTT	R>L	cynS	nonsyn
Sample_F14	NC_000913:3970908	T>A	EX	3970133:3971263	+	ATG>ATA	M>I	spoT	nonsyn
Sample_F14	NC_000913:4392387	G>A	IG
Sample_F15	NC_000913:3411178	T>C	EX	3410280:3411245
Sample_F16	NC_000913:2878389	G>A	IG
Sample_F16	NC_000913:2878390	G>A	IG
Sample_F16	NC_000913:3052984	C>T	EX	3052340:3053518	-	GAG>AAG	E>K	ubiH	nonsyn
Sample_F17	NC_000913:359775	G>T	EX	359489:359959	-	GTC>ATC	V>I	gntR	nonsyn
Sample_F17	NC_000913:1451313	T>G	EX	1449076:1451349	-	ACC>CCC	T>P	tynA	nonsyn
Sample_F17	NC_000913:1464346	C>T	EX	1463539:1464489	+	CGC>TGC	R>C	paaX	nonsyn
Sample_F17	NC_000913:3502770	A>T	EX	3502340:3503170	+	AAA>CAA	K>Q	yhfK	nonsyn
Sample_F18	NC_000913:2529478	G>A	EX	2528161:2530176	-	GGC>GGT	G>G	ligA	syn
Sample_F18	NC_000913:3354487	C>T	IG
Sample_F18	NC_000913:3385421	T>C	IG
Sample_F19	NC_000913:565461	A>G	EX	564815:565978	-	ATC>ACC	I>T	intD	nonsyn
Sample_F19	NC_000913:1059847	A>C	EX	1059256:1061802	+	ATC>CTC	I>L	torA	nonsyn
Sample_F19	NC_000913:2587030	T>C	EX	2585731:2587431	+	TCC>CCC	S>P	narQ	nonsyn
Sample_F21	NC_000913:2001919	C>A	IG
Sample_F22	NC_000913:4492305	A>C	EX	4491206:4492525	-	CTG>CGG	L>R	idnT	nonsyn
Sample_F24	NC_000913:3761856	A>G	EX	3761347:3761955	-	GCG>GCA	A>A	yiaV	syn
Sample_F24	NC_000913:3822654	G>A	EX	3822400:3824508	-	TAT>CAT	Y>H	yibF	nonsyn
Sample_F24	NC_000913:4061404	C>A	EX	4061165:4062145	+	CTG>CAG	L>Q	wecB	nonsyn
Sample_F25	NC_000913:2001919	C>A	IG
Sample_F25	NC_000913:2269387	G>A	EX	2268854:2269567	+	GTG>GTA	V>V	lpxT	syn
Sample_F25	NC_000913:4492305	A>C	EX	4491206:4492525	-	CTG>CGG	L>R	idnT	nonsyn
Sample_F26	NC_000913:839182	A>G	EX	838530:839207	-	TTA>TCA	L>S	ybiX	nonsyn
Sample_F27	NC_000913:809340	C>T	IG
Sample_F29	NC_000913:1334356	C>T	EX	1333855:1334829	+	CGG>TGG	R>W	cysB	nonsyn
Sample_F29	NC_000913:3567417	T>G	EX	3566600:3568033	+	GAT>GTT	D>V	frlC	nonsyn
Sample_F31	NC_000913:222069	T>C	EX	221614:222645	-	ACG>GCG	T>A	metN	nonsyn
Sample_F31	NC_000913:1096704	G>A	EX	1095843:1096829	+	GCC>ACC	A>T	ycdU	nonsyn
Sample_F31	NC_000913:1493013	C>T	EX	1492470:1494110	+	CGT>TGT	R>C	trg	nonsyn
Sample_F31	NC_000913:2159181	G>A	EX	2158386:2161463	+	GTG>ATG	V>M	mdtC	nonsyn
Sample_F31	NC_000913:3487049	A>C	EX	3486791:3488893	-	TTC>TAC	F>Y	rplE	nonsyn
Sample_F32	NC_000913:1056285	C>A	EX	1056261:1057289	+	CTT>ATT	L>I	torT	nonsyn
Sample_F32	NC_000913:3578525	C>T	EX	3577731:3578726	-	GAT>GCT	D>A	glgA	nonsyn
Sample_G1	NC_000913:2890059	T>G	EX	2888387:2890099	-	AAA>ACA	K>T	cysI	nonsyn
Sample_G3	NC_000913:1020956	A>G	IG
Sample_G3	NC_000913:1185661	G>T	IG
Sample_G3	NC_000913:1266314	T>G	EX	1266094:1266927	+	GTG>GGG	V>G	prmC	nonsyn
Sample_G3	NC_000913:1559977	A>T	EX	1559907:1560929	-	CTG>CAG	L>Q	ddpB	nonsyn
Sample_G3	NC_000913:4539940	A>G	IG
Sample_G5	NC_000913:1215541	C>A	IG
Sample_G5	NC_000913:2283996	G>A	IG
Sample_G5	NC_000913:4310859	C>T	EX	4309448:4310980	-	GGC>GAC	G>D	alsA	nonsyn
Sample_G7	NC_000913:1572364	T>C	IG
Sample_G8	NC_000913:606994	C>A	EX	606265:607383	-	GCG>GCT	A>A	ybdK	syn
Sample_G8	NC_000913:1839394	G>A	EX	1838747:1839400	+	CTG>CTA	L>L	ynjD	syn
Sample_G8	NC_000913:2407213	G>A	IG
Sample_G11	NC_000913:1516433	A>T	EX	1515578:1517002	+	ATC>TTC	I>F	patD	nonsyn
Sample_G11	NC_000913:2223470	A>C	EX	2222185:2223900	+	AAA>ACA	K>T	dld	nonsyn
Sample_G13	NC_000913:847878	C>T	EX	847258:848004	-	GGC>AGC	G>S	glnH	nonsyn
Sample_G13	NC_000913:3055364	A>T	EX	3054866:3055444	-	GCT>GCA	A>A	ygfB	syn
Sample_G17	NC_000913:3731078	G>A	IG
Sample_G18	NC_000913:2386516	C>A	EX	2385860:2386831	+	CCC>CCA	P>P	yfbL	syn
Sample_G19	NC_000913:2464114	G>A	IG
Sample_G20	NC_000913:740349	T>G	EX	739507:740925	+	TTT>TTG	F>L	phr	nonsyn
Sample_G20	NC_000913:2405581	T>C	IG
Sample_G20	NC_000913:4001897	T>A	EX	4001426:4002376	+	TTG>ATG	L>M	corA	nonsyn
Sample_G20	NC_000913:4505335	G>T	EX	4505287:4506405	+	GCT>TCT	A>S	yjhC	nonsyn
Sample_G21	NC_000913:192377	C>A	EX	191855:192580	+	CCG>ACG	P>T	pyrH	nonsyn
Sample_G21	NC_000913:1440154	T>G	EX	1437260:1440784	-	ATC>CTC	I>L	pfo	nonsyn
Sample_G24	NC_000913:2773714	A>G	EX	2773318:2775021	+	AAT>GAT	N>D	yfjW	nonsyn
Sample_G25	NC_000913:2204854	A>T	EX	2204596:2205684	+	ACC>TCC	T>S	yehL	nonsyn
Sample_G25	NC_000913:2362710	A>T	EX	2362431:2363633	-	ACT>ACA	T>T	yfaY	syn
Sample_G25	NC_000913:2773714	A>G	EX	2773318:2775021	+	AAT>GAT	N>D	yfjW	nonsyn
Sample_G26	NC_000913:2330107	G>A	IG
Sample_G26	NC_000913:2570675	G>C	EX	2570348:2571751	-	GCC>GCG	A>A	eutE	syn
Sample_G27	NC_000913:842006	A>G	EX	841796:842056	-	TCT>TCC	S>S	mcbA	syn
Sample_G27	NC_000913:3714884	G>T	EX	3714061:3716394	-	GCG>GAG	A>E	bisC	nonsyn
Sample_G31	NC_000913:3803834	C>A	EX	3803058:3804137	-	GCA>TCA	A>S	waaB	nonsyn
Sample_G31	NC_000913:3894843	A>C	EX	3894652:3895218	+	GAA>GAC	E>D	chrR	nonsyn
Sample_h1	NC_000913:3694582	T>C	EX	3692618:3695236	-	ACC>GCC	T>A	bcsA	nonsyn
Sample_h5	NC_000913:2021724	A>C	EX	2021504:2021869	+	GAA>GCA	E>A	fliO	nonsyn
Sample_h5	NC_000913:3755644	C>G	EX	3754973:3756511	-	GAT>CAT	D>H	aldB	nonsyn
Sample_h5	NC_000913:4198522	C>A	EX	4197716:4198780	+	CTC>CTA	L>L	hemE	syn
Sample_h8	NC_000913:659226	A>G	IG
Sample_h8	NC_000913:1051363	G>T	IG
Sample_h8	NC_000913:4176012	T>C	EX	4175944:4177128	+	CAT>CAC	H>H	tufB	syn
Sample_h9	NC_000913:3183662	T>G	IG
Sample_h9	NC_000913:3878161	G>A	EX	3877705:3880119	-	ACC>ACT	T>T	gyrB	syn
Sample_h9	NC_000913:4013006	C>A	IG
Sample_h9	NC_000913:4446316	C>G	EX	4444112:4447891	+	GAC>GAG	D>E	tamB	nonsyn
Sample_h11	NC_000913:3950924	C>T	IG
Sample_h12	NC_000913:1370992	T>G	EX	1370216:1371895	+	ATT>ATG	I>M	ycjM	nonsyn
Sample_h16	NC_000913:2524841	C>A	EX	2524045:2524878	-	TGC>TTC	C>F	xapA	nonsyn
Sample_h19	NC_000913:198503	A>G	EX	197928:200360	+	GAA>GAG	E>E	bamA	syn
Sample_h19	NC_000913:1853471	A>C	EX	1852621:1853979	-	ATC>AGC	I>S	ydjE	nonsyn
Sample_h23	NC_000913:1333369	C>T	EX	1331048:1333645	+	GAC>GAT	D>D	topA	syn
Sample_h25	NC_000913:732597	A>G	EX	729583:733776	+	GTA>GTG	V>V	rhsC	syn
Sample_h25	NC_000913:2716248	C>A	EX	2716066:2716449	-	GAA>TAA	E>*	grcA	nonsyn
Sample_h25	NC_000913:2757711	G>A	EX	2757644:2758600	-	TCT>TTT	S>F	yfjH	nonsyn
Sample_h26	NC_000913:2453994	G>A	IG
Sample_h26	NC_000913:4109771	A>C	EX	4108834:4109823	+	CAA>CCA	Q>P	sbp	nonsyn
Sample_h27	NC_000913:3276810	T>G	EX	3275282:3276853	+	CTG>CGG	L>R	garD	nonsyn
Sample_h28	NC_000913:3276810	T>G	EX	3275282:3276853	+	CTG>CGG	L>R	garD	nonsyn
Sample_h30	NC_000913:118357	C>T	EX	117752:118645	-	GTC>ATC	V>I	nadC	nonsyn
Sample_h33	NC_000913:385700	C>T	EX	385232:386194	+	CAG>TAG	Q>*	tauA	nonsyn
Sample_h33	NC_000913:3690297	G>T	EX	3690268:3692607	-	CGT>AGT	R>S	bcsB	nonsyn
Sample_h33	NC_000913:3690299	C>A	EX	3690268:3692607	-	AGT>ATT	S>I	bcsB	nonsyn
Sample_h37	NC_000913:1602175	C>T	EX	1601490:1603025	+	ACC>ATC	T>I	lsrA	nonsyn
Sample_h41	NC_000913:1278615	T>G	EX	1277957:1279348	+	GTG>GGG	V>G	narK	nonsyn
Sample_h42	NC_000913:1544933	A>G	IG
Sample_h43	NC_000913:311481	C>T	IG
Sample_h45	NC_000913:993901	A>C	EX	993277:994044	-	GGT>GGG	G>G	ssuB	syn
Sample_h46	NC_000913:990007	T>G	EX	989154:990356	-	GAA>GCA	E>A	pncB	nonsyn
Sample_h46	NC_000913:1864529	G>A	EX	1863850:1864734	+	CGT>CAT	R>H	yeaD	nonsyn
Sample_h46	NC_000913:3575244	T>A	EX	3575071:3575664	+	GGT>GGA	G>G	yhgN	syn
Sample_h47	NC_000913:3841028	A>G	EX	3840549:3841739	-	TAT>CAT	Y>H	nepI	nonsyn
Sample_SA1	NC_000913:23628	T>A	EX	22391:25207	+	ATC>AAC	I>N	ileS	nonsyn
Sample_SA1	NC_000913:61436	A>G	EX	60358:63264	-	GTG>GCG	V>A	rapA	nonsyn
Sample_SA1	NC_000913:76222	G>A	EX	75644:77299	-	CTT>TTT	L>F	sgrR	nonsyn
Sample_SA1	NC_000913:185744	A>G	EX	185123:185947	-	CGT>CGC	R>R	dapD	syn
Sample_SA1	NC_000913:317235	A>G	IG
Sample_SA1	NC_000913:317901	A>G	EX	317726:318319	-	GTA>GCA	V>A	rclC	nonsyn
Sample_SA1	NC_000913:456347	A>G	EX	455133:456431	+	GAA>GAG	E>E	tig	syn
Sample_SA1	NC_000913:495606	A>G	EX	495120:496994	+	ACC>GCC	T>A	htpG	nonsyn
Sample_SA1	NC_000913:544528	C>T	EX	544057:545292	-	AGG>AGA	R>R	allC	syn
Sample_SA1	NC_000913:565083	C>T	EX	564815:565978	-	TGG>TAG	W>*	intD	nonsyn
Sample_SA1	NC_000913:576844	A>G	IG
Sample_SA1	NC_000913:696765	T>C	IG
Sample_SA1	NC_000913:802817	A>G	EX	801887:803320	+	ATC>GTC	I>V	ybhI	nonsyn
Sample_SA1	NC_000913:1019907	G>A	EX	1019013:1020053	-	GGC>GGT	G>G	ompA	syn
Sample_SA1	NC_000913:1096269	A>G	EX	1095843:1096829	+	ACC>GCC	T>A	ycdU	nonsyn
Sample_SA1	NC_000913:1107804	C>T	EX	1107784:1108941	-	GAT>AAT	D>N	opgC	nonsyn
Sample_SA1	NC_000913:1216596	A>G	EX	1216369:1216635	+	ACA>ACG	T>T	ariR	syn
Sample_SA1	NC_000913:1258269	A>G	EX	1257929:1258513	-	TTC>TCC	F>S	pth	nonsyn
Sample_SA1	NC_000913:1373802	A>G	EX	1373222:1374103	+	TAC>TGC	Y>C	ycjO	nonsyn
Sample_SA1	NC_000913:1473584	G>A	IG
Sample_SA1	NC_000913:1502430	T>C	IG
Sample_SA1	NC_000913:1537284	A>G	EX	1536614:1537309	-	CTG>CCG	L>P	narW	nonsyn
Sample_SA1	NC_000913:1602933	A>G	EX	1601490:1603025	+	ACC>GCC	T>A	lsrA	nonsyn
Sample_SA1	NC_000913:1622083	C>T	EX	1621332:1622519	+	CCG>CTG	P>L	ydeE	nonsyn
Sample_SA1	NC_000913:1623945	T>C	IG
Sample_SA1	NC_000913:1642528	T>C	EX	1642489:1643241	-	GAA>GAG	E>E	quuQ	syn
Sample_SA1	NC_000913:1826657	A>G	EX	1825955:1826923	-	CCT>CCC	P>P	astE	syn
Sample_SA1	NC_000913:1873987	A>G	EX	1873574:1874077	+	GCA>GCG	A>A	yeaK	syn
Sample_SA1	NC_000913:1893512	T>C	EX	1893367:1893711	+	GTG>GCG	V>A	yoaB	nonsyn
Sample_SA1	NC_000913:1918342	A>G	EX	1917510:1920143	+	CAG>CGG	Q>R	yebT	nonsyn
Sample_SA1	NC_000913:2132853	T>C	EX	2132558:2133397	-	TAC>TGC	Y>C	wcaA	nonsyn
Sample_SA1	NC_000913:2162484	A>G	EX	2161464:2162879	+	ACC>GCC	T>A	mdtD	nonsyn
Sample_SA1	NC_000913:2205386	T>C	EX	2204596:2205684	+	GTC>GCC	V>A	yehL	nonsyn
Sample_SA1	NC_000913:2451996	T>C	EX	2451584:2452336	-	TAC>TGC	Y>C	yfcS	nonsyn
Sample_SA1	NC_000913:2542373	T>C	EX	2541679:2542512	-	TAC>TGC	Y>C	cysU	nonsyn
Sample_SA1	NC_000913:2554015	T>C	EX	2553225:2554124	+	ATC>ACC	I>T	hemF	nonsyn
Sample_SA1	NC_000913:2558867	A>G	EX	2558858:2560066	+	ACA>GCA	T>A	intZ	nonsyn
Sample_SA1	NC_000913:2569574	T>C	EX	2569501:2570337	-	CAC>CGC	H>R	eutJ	nonsyn
Sample_SA1	NC_000913:2692139	A>G	EX	2691656:2695543	-	TGT>TGC	C>C	purL	syn
Sample_SA1	NC_000913:2700960	G>A	EX	2700618:2700998	-	ATC>ATT	I>I	acpS	syn
Sample_SA1	NC_000913:2722848	T>C	EX	2722727:2724082	+	CTG>CCG	L>P	pssA	nonsyn
Sample_SA1	NC_000913:2910950	A>G	EX	2910756:2911091	-	TGT>CGT	C>R	mazF	nonsyn
Sample_SA1	NC_000913:3076261	T>C	EX	3076179:3077456	-	GAA>GGA	E>G	yggP	nonsyn
Sample_SA1	NC_000913:3135180	T>C	EX	3134872:3136371	-	ACC>GCC	T>A	pitB	nonsyn
Sample_SA1	NC_000913:3168329	T>C	EX	3168248:3168544	-	AGA>AGG	R>R	mqsR	syn
Sample_SA1	NC_000913:3173487	G>A	IG
Sample_SA1	NC_000913:3236396	A>G	EX	3235960:3236463	+	TAC>TGC	Y>C	ygjP	nonsyn
Sample_SA1	NC_000913:3248013	C>T	EX	3247773:3248435	+	CTC>TTC	L>F	yqjA	nonsyn
Sample_SA1	NC_000913:3330998	T>C	EX	3330582:3331754	-	ACC>GCC	T>A	obgE	nonsyn
Sample_SA1	NC_000913:3386904	T>C	EX	3386221:3388188	-	ACC>GCC	T>A	aaeB	nonsyn
Sample_SA1	NC_000913:3391146	T>C	EX	3390583:3392028	-	ACC>GCC	T>A	tldD	nonsyn
Sample_SA1	NC_000913:3578147	T>C	EX	3577731:3578726	-	ACT>GCT	T>A	gntR	nonsyn
Sample_SA1	NC_000913:3618671	T>C	EX	3618588:3618989	+	CGT>CGC	R>R	nikR	syn
Sample_SA1	NC_000913:3684091	G>A	EX	3683630:3685618	-	CAC>TAC	H>Y	yhjK	nonsyn
Sample_SA1	NC_000913:3693294	A>G	EX	3692618:3695236	-	GTG>GCG	V>A	bcsA	nonsyn
Sample_SA1	NC_000913:3739412	G>A	EX	3737497:3739527	+	CGC>CAC	R>H	malS	nonsyn
Sample_SA1	NC_000913:3779823	A>G	EX	3779054:3779830	+	AAC>AGC	N>S	lldR	nonsyn
Sample_SA1	NC_000913:3802767	G>A	EX	3802039:3803058	-	CGC>TGC	R>C	waaR	nonsyn
Sample_SA1	NC_000913:3880354	T>C	EX	3880148:3881221	-	ACC>GCC	T>A	recF	nonsyn
Sample_SA1	NC_000913:3889655	G>A	EX	3888730:3890145	+	GGC>GAC	G>D	tnaA	nonsyn
Sample_SA1	NC_000913:3890010	T>C	EX	3888730:3890145	+	TAT>TAC	Y>Y	tnaA	syn
Sample_SA1	NC_000913:3920857	G>A	EX	3920418:3920888	-	GCC>GTC	A>V	atpF	nonsyn
Sample_SA1	NC_000913:4032996	G>A	EX	4032492:4033106	+	GCA>ACA	A>T	yigZ	nonsyn
Sample_SA1	NC_000913:4072496	A>G	EX	4071773:4072651	-	GCT>GCC	A>A	yihT	syn
Sample_SA1	NC_000913:4073210	A>G	EX	4072675:4073571	-	GTA>GCA	V>A	yihU	nonsyn
Sample_SA1	NC_000913:4085140	A>G	EX	4082772:4085822	-	GTG>GCG	V>A	fdoG	nonsyn
Sample_SA1	NC_000913:4241662	C>T	EX	4240779:4242254	-	GGC>GAC	G>D	xylE	nonsyn
Sample_SA1	NC_000913:4396927	A>G	EX	4396065:4397402	+	AAC>AGC	N>S	amiB	nonsyn
Sample_SA1	NC_000913:4419120	A>G	EX	4418561:4419625	-	GTA>GCA	V>A	ulaG	nonsyn
Sample_SA1	NC_000913:4464688	A>G	EX	4463054:4464709	-	TGG>CGG	W>R	treC	nonsyn
Sample_SA1	NC_000913:4502150	G>A	EX	4502103:4503431	-	CCC>TCC	P>S	insG	nonsyn
Sample_SA1	NC_000913:4525938	A>G	IG
Sample_SA1	NC_000913:4579005	A>G	EX	4577958:4579337	-	GGT>GGC	G>G	mcrB	syn
Sample_SA1	NC_000913:4598496	A>G	EX	4597150:4599441	-	TTT>CTT	F>L	opgB	nonsyn
Sample_SA1	NC_000913:4614444	A>G	IG
Sample_SA1	NC_000913:4614447	C>T	IG
Sample_SA2	NC_000913:44649	T>A	EX	44180:45466	+	ATC>AAC	I>N	fixC	nonsyn
Sample_SA2	NC_000913:49952	C>T	EX	49823:50302	+	CGC>TGC	R>C	folA	nonsyn
Sample_SA2	NC_000913:67514	A>G	EX	66835:68337	-	TTC>TCC	F>S	araA	nonsyn
Sample_SA2	NC_000913:92794	A>G	EX	91413:93179	+	GAA>GGA	E>G	ftsI	nonsyn
Sample_SA2	NC_000913:95284	A>G	EX	94650:96008	+	AAC>AGC	N>S	murF	nonsyn
Sample_SA2	NC_000913:96751	A>G	EX	96002:97084	+	GGA>GGG	G>G	mraY	syn
Sample_SA2	NC_000913:160856	C>T	EX	160782:161486	-	GAA>AAA	E>K	sfsA	nonsyn
Sample_SA2	NC_000913:161375	T>C	EX	160782:161486	-	ACG>GCG	T>A	sfsA	nonsyn
Sample_SA2	NC_000913:167921	C>T	EX	167484:169727	+	GGC>GGT	G>G	fhuA	syn
Sample_SA2	NC_000913:172966	A>G	EX	171462:173444	+	GAC>GGC	D>G	fhuB	nonsyn
Sample_SA2	NC_000913:240093	T>C	EX	239419:240189	-	ACC>GCC	T>A	yafV	nonsyn
Sample_SA2	NC_000913:248794	A>G	IG
Sample_SA2	NC_000913:259628	T>C	EX	259045:260100	-	GAC>GGC	D>G	phoE	nonsyn
Sample_SA2	NC_000913:267053	A>G	IG
Sample_SA2	NC_000913:292678	A>G	EX	292322:292948	-	TGC>CGC	C>R	yagK	nonsyn
Sample_SA2	NC_000913:297920	C>T	EX	297770:298726	-	TGG>TGA	W>*	paoD	nonsyn
Sample_SA2	NC_000913:310174	A>G	EX	310084:310671	-	GGT>GGC	G>G	ecpA	syn
Sample_SA2	NC_000913:332298	A>G	IG
Sample_SA2	NC_000913:350595	T>C	EX	350012:351181	+	GTG>GCG	V>A	prpC	nonsyn
Sample_SA2	NC_000913:355558	G>A	EX	354922:356181	+	GAC>AAC	D>N	codB	nonsyn
Sample_SA2	NC_000913:396289	G>T	IG
Sample_SA2	NC_000913:408854	A>G	IG
Sample_SA2	NC_000913:436184	A>G	EX	435634:436611	+	GAC>GGC	D>G	thiL	nonsyn
Sample_SA2	NC_000913:462084	A>G	EX	461915:463786	+	AAC>AGC	N>S	ppiD	nonsyn
Sample_SA2	NC_000913:487226	A>G	EX	486536:489898	+	ACC>GCC	T>A	mscK	nonsyn
Sample_SA2	NC_000913:488020	C>T	EX	486536:489898	+	AAC>AAT	N>N	mscK	syn
Sample_SA2	NC_000913:509037	C>T	EX	508875:511379	-	GCG>GCA	A>A	copA	syn
Sample_SA2	NC_000913:512960	C>T	EX	512576:513868	+	CAC>TAC	H>Y	ybaT	nonsyn
Sample_SA2	NC_000913:554413	C>T	EX	553943:554437	-	GGC>AGC	G>S	ppiB	nonsyn
Sample_SA2	NC_000913:557365	T>C	EX	556875:557741	-	TAC>TGC	Y>C	folD	nonsyn
Sample_SA2	NC_000913:569654	A>G	EX	568902:570428	+	GTA>GTG	V>V	ybcK	syn
Sample_SA2	NC_000913:595667	A>G	EX	595600:596973	+	GAT>GGT	D>G	cusC	nonsyn
Sample_SA2	NC_000913:606018	A>G	EX	605951:606199	-	GTG>GCG	V>A	ybdJ	nonsyn
Sample_SA2	NC_000913:631466	T>C	EX	629894:631999	+	TGC>CGC	C>R	cstA	nonsyn
Sample_SA2	NC_000913:657611	A>G	EX	657555:657938	-	TCT>CCT	S>P	flc	nonsyn
Sample_SA2	NC_000913:663002	A>G	EX	662752:663963	-	GTT>GCT	V>A	dacA	nonsyn
Sample_SA2	NC_000913:680825	C>T	EX	680212:681663	+	GCG>GTG	A>V	djlC	nonsyn
Sample_SA2	NC_000913:716838	T>C	IG
Sample_SA2	NC_000913:747238	G>A	EX	746723:747769	-	CCA>TCA	P>S	abrB	nonsyn
Sample_SA2	NC_000913:753785	A>G	EX	753185:754468	-	GCT>GCC	A>A	gltA	syn
Sample_SA2	NC_000913:773056	A>G	EX	773042:774181	+	GAA>GAG	E>E	cydB	syn
Sample_SA2	NC_000913:810717	C>T	EX	810381:811535	+	CAG>TAG	Q>*	bioF	nonsyn
Sample_SA2	NC_000913:814393	A>G	EX	813526:815547	+	ACC>GCC	T>A	uvrB	nonsyn
Sample_SA2	NC_000913:814615	T>C	EX	813526:815547	+	TAC>CAC	Y>H	uvrB	nonsyn
Sample_SA2	NC_000913:817569	A>G	EX	817044:818033	+	ACC>GCC	T>A	moaA	nonsyn
Sample_SA2	NC_000913:819350	A>G	EX	819295:819747	+	TAC>TGC	Y>C	moaE	nonsyn
Sample_SA2	NC_000913:819562	C>T	EX	819295:819747	+	CCG>TCG	P>S	moaE	nonsyn
Sample_SA2	NC_000913:905164	A>G	EX	904913:905743	+	AAA>AAG	K>K	amiD	syn
Sample_SA2	NC_000913:913708	T>C	EX	912162:913814	-	GAT>GGT	D>G	hcp	nonsyn
Sample_SA2	NC_000913:937408	A>G	EX	937372:937983	+	AGC>GGC	S>G	lolA	nonsyn
Sample_SA2	NC_000913:953133	T>C	EX	951272:953554	-	TAC>TGC	Y>C	pflB	nonsyn
Sample_SA2	NC_000913:959596	T>C	EX	958812:960095	+	GTG>GCG	V>A	aroA	nonsyn
Sample_SA2	NC_000913:964536	A>G	EX	964320:966584	+	ACC>GCC	T>A	ycaI	nonsyn
Sample_SA2	NC_000913:981608	C>T	EX	981047:982894	+	CTC>TTC	L>F	ldtD	nonsyn
Sample_SA2	NC_000913:993107	C>T	EX	990622:993234	+	CCG>CTG	P>L	pepN	nonsyn
Sample_SA2	NC_000913:995625	A>G	EX	994843:995988	-	TTC>CTC	F>L	ssuD	nonsyn
Sample_SA2	NC_000913:1031146	T>C	EX	1030759:1031418	-	GGA>GGG	G>G	yccA	syn
Sample_SA2	NC_000913:1048711	T>C	EX	1048688:1049332	-	ACG>GCG	T>A	gfcB	nonsyn
Sample_SA2	NC_000913:1063518	A>G	EX	1062855:1063775	-	GGT>GGC	G>G	cbpA	syn
Sample_SA2	NC_000913:1114209	T>C	IG
Sample_SA2	NC_000913:1117145	A>G	EX	1116807:1117859	+	GTA>GTG	V>V	yceA	syn
Sample_SA2	NC_000913:1122897	T>C	EX	1122713:1123273	-	GAA>GGA	E>G	yceB	nonsyn
Sample_SA2	NC_000913:1129446	T>C	EX	1129414:1129830	-	ACC>GCC	T>A	flgN	nonsyn
Sample_SA2	NC_000913:1141011	A>G	IG
Sample_SA2	NC_000913:1146451	C>T	EX	1146011:1146595	-	GCA>ACA	A>T	yceF	nonsyn
Sample_SA2	NC_000913:1169298	A>G	EX	1169073:1169330	+	ACC>GCC	T>A	bhsA	nonsyn
Sample_SA2	NC_000913:1186648	A>G	EX	1185844:1187070	+	ACC>GCC	T>A	pepT	nonsyn
Sample_SA2	NC_000913:1198843	T>C	EX	1198695:1199588	+	GTC>GCC	V>A	lit	nonsyn
Sample_SA2	NC_000913:1218688	T>A	EX	1217328:1218851	+	ATC>AAC	I>N	ycgG	nonsyn
Sample_SA2	NC_000913:1235410	A>G	EX	1234938:1235657	+	AAC>AGC	N>S	fadR	nonsyn
Sample_SA2	NC_000913:1239429	A>G	EX	1238879:1239949	+	GAG>GGG	E>G	dadX	nonsyn
Sample_SA2	NC_000913:1240360	A>G	EX	1240335:1242071	-	GTG>GCG	V>A	cvrA	nonsyn
Sample_SA2	NC_000913:1255729	T>C	EX	1253085:1255952	-	AAC>AGC	N>S	ycgV	nonsyn
Sample_SA2	NC_000913:1260326	T>C	EX	1259124:1260803	-	ATG>GTG	M>V	dauA	nonsyn
Sample_SA2	NC_000913:1310633	T>C	EX	1310569:1310865	-	GAC>GGC	D>G	yciI	nonsyn
Sample_SA2	NC_000913:1316308	A>G	IG
Sample_SA2	NC_000913:1349988	T>C	EX	1348980:1350107	-	CTA>CTG	L>L	yciW	syn
Sample_SA2	NC_000913:1370786	A>G	EX	1370216:1371895	+	ACC>GCC	T>A	ycjM	nonsyn
Sample_SA2	NC_000913:1411098	A>G	EX	1411013:1411948	-	ATC>ACC	I>T	ttcA	nonsyn
Sample_SA2	NC_000913:1415477	A>G	EX	1414786:1417386	-	GTG>GCG	V>A	recE	nonsyn
Sample_SA2	NC_000913:1423117	T>C	IG
Sample_SA2	NC_000913:1442780	A>G	EX	1441854:1442843	-	TCC>CCC	S>P	ldhA	nonsyn
Sample_SA2	NC_000913:1477416	A>G	EX	1475144:1477450	+	GAA>GGA	E>G	ydbD	nonsyn
Sample_SA2	NC_000913:1523773	A>G	EX	1523307:1524368	+	TAC>TGC	Y>C	yncE	nonsyn
Sample_SA2	NC_000913:1617935	T>C	EX	1617028:1618218	+	GTG>GCG	V>A	ydeA	nonsyn
Sample_SA2	NC_000913:1647872	T>C	IG
Sample_SA2	NC_000913:1653859	T>C	EX	1652896:1653915	-	ATA>ATG	I>M	rspB	nonsyn
Sample_SA2	NC_000913:1669116	T>C	EX	1668699:1669592	-	GAA>GAG	E>E	ynfL	syn
Sample_SA2	NC_000913:1686030	T>C	EX	1685185:1686588	-	ACT>GCT	T>A	fumC	nonsyn
Sample_SA2	NC_000913:1712061	T>A	EX	1711523:1712158	+	ATC>AAC	I>N	nth	nonsyn
Sample_SA2	NC_000913:1759693	A>G	EX	1759303:1760523	-	GGT>GGC	G>G	sufS	syn
Sample_SA2	NC_000913:1762926	T>C	EX	1762522:1764009	-	ATC>GTC	I>V	sufB	nonsyn
Sample_SA2	NC_000913:1765033	A>G	EX	1764934:1765122	-	CGT>CGC	R>R	ydiH	syn
Sample_SA2	NC_000913:1768984	A>G	IG
Sample_SA2	NC_000913:1800309	T>C	EX	1800096:1800638	-	AAA>AAG	K>K	infC	syn
Sample_SA2	NC_000913:1833010	T>C	EX	1832428:1833234	+	TTG>CTG	L>L	xthA	syn
Sample_SA2	NC_000913:1862358	A>G	EX	1862016:1862429	-	AAT>AAC	N>N	msrB	syn
Sample_SA2	NC_000913:1868685	A>G	EX	1866908:1868842	+	GAG>GGG	E>G	yeaG	nonsyn
Sample_SA2	NC_000913:1888669	T>C	EX	1888061:1889746	-	ACC>GCC	T>A	fadD	nonsyn
Sample_SA2	NC_000913:1892154	T>C	EX	1891325:1893235	-	TAC>TGC	Y>C	yoaA	nonsyn
Sample_SA2	NC_000913:1893444	T>C	EX	1893367:1893711	+	GGT>GGC	G>G	yoaB	syn
Sample_SA2	NC_000913:1894559	T>C	EX	1894552:1894731	-	GAC>GGC	D>G	yoaH	nonsyn
Sample_SA2	NC_000913:1897014	A>G	EX	1896932:1898296	+	CAG>CGG	Q>R	sdaA	nonsyn
Sample_SA2	NC_000913:1910695	A>G	EX	1910276:1911649	+	AGA>AGG	R>R	yebQ	syn
Sample_SA2	NC_000913:1910872	T>C	EX	1910276:1911649	+	AGT>AGC	S>S	yebQ	syn
Sample_SA2	NC_000913:1911482	A>G	EX	1910276:1911649	+	ACG>GCG	T>A	yebQ	nonsyn
Sample_SA2	NC_000913:1923728	T>C	EX	1923719:1924591	-	GAA>GAG	E>E	yebZ	syn
Sample_SA2	NC_000913:1933283	T>C	EX	1932793:1934604	-	AAC>AGC	N>S	edd	nonsyn
Sample_SA2	NC_000913:1950721	T>C	IG
Sample_SA2	NC_000913:1951800	T>C	EX	1951395:1952213	+	TTT>CTT	F>L	yecE	nonsyn
Sample_SA2	NC_000913:1960640	C>T	EX	1960062:1961795	+	TAC>TAT	Y>Y	argS	syn
Sample_SA2	NC_000913:1961068	A>G	EX	1960062:1961795	+	TAC>TGC	Y>C	argS	nonsyn
Sample_SA2	NC_000913:1971320	C>T	EX	1971030:1972691	-	GCA>ACA	A>T	tar	nonsyn
Sample_SA2	NC_000913:2050256	T>C	EX	2044938:2052014	+	GGT>GGC	G>G	yeeJ	syn
Sample_SA2	NC_000913:2064563	T>C	EX	2064479:2065222	-	AAA>AAG	K>K	cobS	syn
Sample_SA2	NC_000913:2131188	T>C	EX	2130853:2132070	-	ACC>GCC	T>A	wcaC	nonsyn
Sample_SA2	NC_000913:2132960	T>C	EX	2132558:2133397	-	TCA>TCG	S>S	wcaA	syn
Sample_SA2	NC_000913:2133254	T>C	EX	2132558:2133397	-	GAA>GAG	E>E	wcaA	syn
Sample_SA2	NC_000913:2133354	T>C	EX	2132558:2133397	-	AAC>AGC	N>S	wcaA	nonsyn
Sample_SA2	NC_000913:2164864	A>G	EX	2164276:2164998	+	ACC>GCC	T>A	baeR	nonsyn
Sample_SA2	NC_000913:2191756	T>C	EX	2191680:2192222	-	TAC>TGC	Y>C	yehD	nonsyn
Sample_SA2	NC_000913:2194467	T>C	EX	2194300:2196333	+	GGT>GGC	G>G	metG	syn
Sample_SA2	NC_000913:2238970	T>C	EX	2237769:2239289	-	GAT>GGT	D>G	mglA	nonsyn
Sample_SA2	NC_000913:2243328	T>C	EX	2242984:2243652	-	AGC>GGC	S>G	folE	nonsyn
Sample_SA2	NC_000913:2323390	A>G	IG
Sample_SA2	NC_000913:2323953	T>C	EX	2323447:2324109	+	CTT>CTC	L>L	atoD	syn
Sample_SA2	NC_000913:2358606	T>G	EX	2358042:2358845	-	AAA>AAC	K>N	rhmA	nonsyn
Sample_SA2	NC_000913:2387812	T>C	EX	2387710:2388426	-	ATA>ATG	I>M	yfbN	nonsyn
Sample_SA2	NC_000913:2410743	T>C	EX	2409520:2411352	-	ACC>GCC	T>A	yfbS	nonsyn
Sample_SA2	NC_000913:2436051	A>G	EX	2435636:2436649	-	CTG>CCG	L>P	usg	nonsyn
Sample_SA2	NC_000913:2436321	A>G	EX	2435636:2436649	-	GTG>GCG	V>A	usg	nonsyn
Sample_SA2	NC_000913:2449134	T>C	EX	2448606:2449157	+	TGG>CGG	W>R	smrB	nonsyn
Sample_SA2	NC_000913:2450267	T>C	EX	2450051:2450590	-	GCA>GCG	A>A	yfcP	syn
Sample_SA2	NC_000913:2458524	T>C	EX	2457015:2459159	-	CTA>CTG	L>L	fadJ	syn
Sample_SA2	NC_000913:2473708	T>C	EX	2473604:2473966	+	GGT>GGC	G>G	yfdP	syn
Sample_SA2	NC_000913:2482694	T>C	EX	2482176:2483339	-	ACC>GCC	T>A	emrK	nonsyn
Sample_SA2	NC_000913:2493473	T>C	IG
Sample_SA2	NC_000913:2516178	T>C	EX	2515643:2517832	-	GAT>GGT	D>G	yfeA	nonsyn
Sample_SA2	NC_000913:2527180	T>C	EX	2526946:2527944	+	TTT>CTT	F>L	yfeH	nonsyn
Sample_SA2	NC_000913:2565068	T>C	EX	2564523:2565332	+	GCT>GCC	A>A	yffS	syn
Sample_SA2	NC_000913:2603373	C>T	EX	2601818:2603836	+	GCA>GTA	A>V	hyfB	nonsyn
Sample_SA2	NC_000913:2667374	A>G	EX	2666707:2667846	-	GTG>GCG	V>A	hcaT	nonsyn
Sample_SA2	NC_000913:2678956	C>T	EX	2678384:2679367	-	GAT>AAT	D>N	yphF	nonsyn
Sample_SA2	NC_000913:2709912	G>A	EX	2709437:2710012	-	GCG>GTG	A>V	rpoE	nonsyn
Sample_SA2	NC_000913:2717918	T>C	EX	2717491:2718528	-	AAC>AGC	N>S	yfiF	nonsyn
Sample_SA2	NC_000913:2719314	G>A	EX	2719223:2719921	+	TGC>TAC	C>Y	yfiP	nonsyn
Sample_SA2	NC_000913:2736695	T>C	EX	2736146:2736883	+	TAC>CAC	Y>H	bamD	nonsyn
Sample_SA2	NC_000913:2747178	T>C	EX	2746434:2747795	-	AAA>AAG	K>K	ffh	syn
Sample_SA2	NC_000913:2754835	T>C	IG
Sample_SA2	NC_000913:2761692	T>C	EX	2761351:2763540	-	ACC>GCC	T>A	yfjK	nonsyn
Sample_SA2	NC_000913:2799222	T>C	EX	2799164:2799613	+	GTT>GCT	V>A	alaE	nonsyn
Sample_SA2	NC_000913:2846778	T>C	EX	2846489:2847412	-	TAC>TGC	Y>C	hycD	nonsyn
Sample_SA2	NC_000913:2852544	A>G	EX	2852136:2853257	+	ACC>GCC	T>A	hypD	nonsyn
Sample_SA2	NC_000913:2876821	T>C	EX	2876581:2877618	+	TAT>CAT	Y>H	iap	nonsyn
Sample_SA2	NC_000913:2891288	G>A	EX	2890099:2891898	-	GCG>GTG	A>V	cysJ	nonsyn
Sample_SA2	NC_000913:2928992	A>G	EX	2928229:2929518	+	CAC>CGC	H>R	sdaC	nonsyn
Sample_SA2	NC_000913:2945158	G>A	EX	2945036:2945842	-	CCG>TCG	P>S	tcdA	nonsyn
Sample_SA2	NC_000913:2975062	A>G	EX	2973855:2976014	-	CTC>CCC	L>P	aas	nonsyn
Sample_SA2	NC_000913:2980451	T>C	EX	2979943:2980635	-	GAC>GGC	D>G	ygeA	nonsyn
Sample_SA2	NC_000913:3021527	T>C	EX	3021316:3024186	+	ATT>ACT	I>T	xdhD	nonsyn
Sample_SA2	NC_000913:3021834	T>C	EX	3021316:3024186	+	GGT>GGC	G>G	xdhD	syn
Sample_SA2	NC_000913:3027054	T>C	EX	3025766:3027085	+	GTT>GCT	V>A	guaD	nonsyn
Sample_SA2	NC_000913:3092826	T>C	EX	3091878:3092828	+	TAA>CAA	*>Q	gshB	nonsyn
Sample_SA2	NC_000913:3118876	T>C	EX	3114550:3119112	-	ACA>ACG	T>T	sslE	syn
Sample_SA2	NC_000913:3136857	T>C	EX	3136663:3138522	-	ACC>GCC	T>A	gss	nonsyn
Sample_SA2	NC_000913:3139070	T>C	EX	3138727:3139593	+	GTG>GCG	V>A	yghU	nonsyn
Sample_SA2	NC_000913:3160352	T>C	EX	3158927:3161146	-	AAA>AAG	K>K	ygiQ	syn
Sample_SA2	NC_000913:3177380	G>A	EX	3177281:3177910	-	TAC>TAT	Y>Y	nudF	syn
Sample_SA2	NC_000913:3183758	G>A	IG
Sample_SA2	NC_000913:3194192	T>C	EX	3192864:3194525	+	TCT>TCC	S>S	yqiK	syn
Sample_SA2	NC_000913:3196132	T>C	EX	3195320:3196753	-	ACC>GCC	T>A	hldE	nonsyn
Sample_SA2	NC_000913:3209848	A>G	EX	3209530:3210543	-	CGT>CGC	R>R	tsaD	syn
Sample_SA2	NC_000913:3219641	T>C	EX	3219494:3220873	+	TTT>CTT	F>L	patA	nonsyn
Sample_SA2	NC_000913:3229579	A>C	EX	3228888:3231239	+	AAC>ACC	N>T	ygjK	nonsyn
Sample_SA2	NC_000913:3231244	C>T	IG
Sample_SA2	NC_000913:3233270	A>G	EX	3231665:3233683	+	AGT>GGT	S>G	fadH	nonsyn
Sample_SA2	NC_000913:3258798	T>C	EX	3258285:3259649	-	GCA>GCG	A>A	tdcG	syn
Sample_SA2	NC_000913:3277637	G>A	EX	3277337:3277801	+	GAA>AAA	E>K	yhaV	nonsyn
Sample_SA2	NC_000913:3297054	T>C	IG
Sample_SA2	NC_000913:3321600	T>C	EX	3319988:3321613	-	AAC>AGC	N>S	yhbX	nonsyn
Sample_SA2	NC_000913:3325412	G>A	EX	3325001:3326935	-	GGC>GGT	G>G	ftsH	syn
Sample_SA2	NC_000913:3347364	T>C	EX	3347115:3347969	+	TTC>CTC	F>L	yhbJ	nonsyn
Sample_SA2	NC_000913:3350370	T>C	EX	3349806:3350459	-	TCA>TCG	S>S	elbB	syn
Sample_SA2	NC_000913:3371534	G>A	EX	3371084:3372574	-	AGC>AGT	S>S	nanT	syn
Sample_SA2	NC_000913:3378236	A>G	EX	3378223:3378651	-	GTT>GCT	V>A	rplM	nonsyn
Sample_SA2	NC_000913:3382431	A>G	EX	3382200:3383267	+	ACC>GCC	T>A	degS	nonsyn
Sample_SA2	NC_000913:3384205	T>C	EX	3383330:3384268	-	ACC>GCC	T>A	mdh	nonsyn
Sample_SA2	NC_000913:3394598	T>C	EX	3392458:3396258	-	CAC>CGC	H>R	yhdP	nonsyn
Sample_SA2	NC_000913:3417646	G>A	EX	3415033:3418137	+	GCT>ACT	A>T	acrF	nonsyn
Sample_SA2	NC_000913:3423026	T>C	EX	3422436:3423194	+	GGT>GGC	G>G	yhdZ	syn
Sample_SA2	NC_000913:3423583	T>C	IG
Sample_SA2	NC_000913:3435851	A>G	EX	3435207:3436496	+	GCA>GCG	A>A	rsmB	syn
Sample_SA2	NC_000913:3460853	T>C	EX	3459817:3461013	+	GTC>GCC	V>A	gspF	nonsyn
Sample_SA2	NC_000913:3475777	T>C	EX	3475718:3476440	-	ACT>GCT	T>A	yheO	nonsyn
Sample_SA2	NC_000913:3483477	T>C	EX	3483202:3484224	+	GGT>GGC	G>G	yheT	syn
Sample_SA2	NC_000913:3503969	A>G	IG
Sample_SA2	NC_000913:3512428	A>G	IG
Sample_SA2	NC_000913:3530086	A>G	EX	3529774:3530652	+	AAA>GAA	K>E	hslO	nonsyn
Sample_SA2	NC_000913:3560978	A>G	EX	3560622:3561452	-	TGG>CGG	W>R	glpG	nonsyn
Sample_SA2	NC_000913:3592052	T>C	EX	3591009:3592325	-	ACC>GCC	T>A	ugpB	nonsyn
Sample_SA2	NC_000913:3618536	T>C	EX	3617776:3618582	+	GTA>GCA	V>A	nikE	nonsyn
Sample_SA2	NC_000913:3681832	T>C	EX	3680444:3681940	-	ACG>GCG	T>A	yhjJ	nonsyn
Sample_SA2	NC_000913:3690141	G>A	EX	3689155:3690261	-	CGC>TGC	R>C	bcsZ	nonsyn
Sample_SA2	NC_000913:3727035	C>T	EX	3726924:3727361	-	CTG>CTA	L>L	yiaA	syn
Sample_SA2	NC_000913:3733854	G>T	EX	3733720:3734901	+	TGG>TGT	W>C	xylH	nonsyn
Sample_SA2	NC_000913:3740862	T>C	EX	3739705:3740958	+	TGT>TGC	C>C	avtA	syn
Sample_SA2	NC_000913:3755853	T>C	EX	3754973:3756511	-	AAC>AGC	N>S	aldB	nonsyn
Sample_SA2	NC_000913:3795413	T>C	EX	3794929:3795975	+	GTG>GCG	V>A	waaF	nonsyn
Sample_SA2	NC_000913:3800701	T>C	EX	3800267:3800965	-	ACC>GCC	T>A	waaY	nonsyn
Sample_SA2	NC_000913:3811453	A>G	EX	3811438:3811674	-	CGT>CGC	R>R	rpmB	syn
Sample_SA2	NC_000913:3838391	T>C	EX	3838248:3839171	+	GGT>GGC	G>G	yicL	syn
Sample_SA2	NC_000913:3925833	A>G	IG
Sample_SA2	NC_000913:3959297	A>G	EX	3957970:3959445	+	GAC>GGC	D>G	ilvC	nonsyn
Sample_SA2	NC_000913:3982341	A>G	IG
Sample_SA2	NC_000913:3982979	C>T	EX	3982958:3984193	+	CGT>TGT	R>C	aslB	nonsyn
Sample_SA2	NC_000913:4050106	T>C	IG
Sample_SA2	NC_000913:4071065	T>C	EX	4070515:4071756	-	AAC>AGC	N>S	yihS	nonsyn
Sample_SA2	NC_000913:4081926	A>G	EX	4081857:4082759	-	GGT>GGC	G>G	fdoH	syn
Sample_SA2	NC_000913:4089167	A>G	EX	4088107:4089855	-	GTA>GCA	V>A	frvR	nonsyn
Sample_SA2	NC_000913:4191903	T>C	EX	4191865:4192635	-	ACC>GCC	T>A	thiG	nonsyn
Sample_SA2	NC_000913:4197707	A>G	IG
Sample_SA2	NC_000913:4259101	A>G	EX	4257742:4259121	+	ACC>GCC	T>A	dinF	nonsyn
Sample_SA2	NC_000913:4264022	A>G	EX	4263248:4264231	-	AGT>AGC	S>S	qorA	syn
Sample_SA2	NC_000913:4297153	A>G	IG
Sample_SA2	NC_000913:4310914	A>G	EX	4309448:4310980	-	TCG>CCG	S>P	alsA	nonsyn
Sample_SA2	NC_000913:4315105	T>C	EX	4315104:4315538	-	TAA>TGA	*>*	phnO	syn
Sample_SA2	NC_000913:4342445	A>G	EX	4341911:4343266	+	ACG>GCG	T>A	melA	nonsyn
Sample_SA2	NC_000913:4395956	A>G	EX	4395585:4396046	+	ATA>ATG	I>M	tsaE	nonsyn
Sample_SA2	NC_000913:4403783	A>G	EX	4403300:4404304	+	ACA>GCA	T>A	hflC	nonsyn
Sample_SA2	NC_000913:4427055	T>C	EX	4426628:4427422	-	GAA>GGA	E>G	yjfZ	nonsyn
Sample_SA2	NC_000913:4443625	A>G	EX	4442382:4444115	+	TAC>TGC	Y>C	tamA	nonsyn
Sample_SA2	NC_000913:4459407	T>C	IG
Sample_SA2	NC_000913:4467921	C>T	EX	4467625:4470321	+	AAC>AAT	N>N	mgtA	syn
Sample_SA2	NC_000913:4472616	A>G	IG
Sample_SA2	NC_000913:4474375	T>C	EX	4474124:4474717	+	CGT>CGC	R>R	bdcR	syn
Sample_SA2	NC_000913:4491316	A>G	EX	4491206:4492525	-	TAT>CAT	Y>H	idnT	nonsyn
Sample_SA2	NC_000913:4535577	A>G	IG
Sample_SA2	NC_000913:4539429	T>C	EX	4538785:4539501	-	ACA>GCA	T>A	nanC	nonsyn
Sample_SA2	NC_000913:4545121	A>G	EX	4545096:4547732	+	TAC>TGC	Y>C	fimD	nonsyn
Sample_SA2	NC_000913:4570181	A>G	EX	4570162:4571574	-	GTG>GCG	V>A	yjiR	nonsyn
Sample_SA2	NC_000913:4608698	A>G	EX	4608646:4609323	+	GAC>GGC	D>G	yjjG	nonsyn
Sample_SA2	NC_000913:4635251	C>T	EX	4634441:4635310	-	CAG>CAA	Q>Q	rob	syn
Sample_SA2	NC_000913:4637883	T>A	EX	4636696:4638120	+	GAT>GAA	D>E	creC	nonsyn
Sample_SA3	NC_000913:66691	C>T	IG
Sample_SA3	NC_000913:68927	C>T	EX	68348:70048	-	CTG>CTA	L>L	araB	syn
Sample_SA3	NC_000913:125397	A>G	EX	123017:125680	+	AAC>AGC	N>S	aceE	nonsyn
Sample_SA3	NC_000913:148742	A>G	EX	147944:148795	-	CGT>CGC	R>R	panC	syn
Sample_SA3	NC_000913:204616	G>A	EX	204493:205089	+	GGG>AGG	G>R	rnhB	nonsyn
Sample_SA3	NC_000913:288244	A>G	EX	286789:288399	+	ACC>GCC	T>A	yagH	nonsyn
Sample_SA3	NC_000913:301619	A>G	EX	300931:301887	-	GTA>GCA	V>A	paoB	nonsyn
Sample_SA3	NC_000913:314657	A>G	IG
Sample_SA3	NC_000913:327559	A>G	EX	327261:328733	-	GTG>GCG	V>A	betB	nonsyn
Sample_SA3	NC_000913:349090	A>G	EX	348682:349572	+	ATG>GTG	M>V	prpB	nonsyn
Sample_SA3	NC_000913:353870	A>G	EX	352706:354592	+	ACC>GCC	T>A	prpE	nonsyn
Sample_SA3	NC_000913:358218	A>G	EX	357791:358690	-	ATT>ACT	I>T	cynR	nonsyn
Sample_SA3	NC_000913:443220	T>C	EX	443051:443641	-	GAC>GGC	D>G	yajL	nonsyn
Sample_SA3	NC_000913:450740	T>G	EX	450663:451610	-	ACC>CCC	T>P	cyoA	nonsyn
Sample_SA3	NC_000913:533356	A>G	EX	533011:533826	+	ACG>GCG	T>A	allR	nonsyn
Sample_SA3	NC_000913:544227	C>T	EX	544057:545292	-	GCC>ACC	A>T	allC	nonsyn
Sample_SA3	NC_000913:640126	A>G	EX	639753:641318	+	TAC>TGC	Y>C	ahpF	nonsyn
Sample_SA3	NC_000913:644549	T>C	EX	644197:645003	-	GAA>GGA	E>G	rna	nonsyn
Sample_SA3	NC_000913:695316	A>G	EX	695101:696276	+	GTA>GTG	V>V	ubiF	syn
Sample_SA3	NC_000913:706889	A>G	EX	706093:707757	+	TAC>TGC	Y>C	glnS	nonsyn
Sample_SA3	NC_000913:723225	A>G	EX	721730:724414	-	GTA>GCA	V>A	kdpD	nonsyn
Sample_SA3	NC_000913:727403	C>T	EX	727059:728732	-	GCC>ACC	A>T	kdpA	nonsyn
Sample_SA3	NC_000913:736780	A>G	IG
Sample_SA3	NC_000913:924322	A>G	EX	923264:925540	+	GAA>GAG	E>E	clpA	syn
Sample_SA3	NC_000913:951821	A>G	EX	951272:953554	-	GCT>GCC	A>A	pflB	syn
Sample_SA3	NC_000913:1004559	A>G	EX	1003947:1004657	+	ACA>GCA	T>A	ycbF	nonsyn
Sample_SA3	NC_000913:1032116	C>T	IG
Sample_SA3	NC_000913:1155243	A>G	EX	1155124:1155765	+	GAA>GAG	E>E	tmk	syn
Sample_SA3	NC_000913:1212445	A>G	IG
Sample_SA3	NC_000913:1218781	A>G	EX	1217328:1218851	+	AAA>AGA	K>R	ycgG	nonsyn
Sample_SA3	NC_000913:1251504	G>A	EX	1251066:1252985	+	GCA>ACA	A>T	dhaR	nonsyn
Sample_SA3	NC_000913:1257795	A>G	EX	1256721:1257812	-	GGT>GGC	G>G	ychF	syn
Sample_SA3	NC_000913:1271290	A>G	EX	1270749:1271849	-	CTG>CCG	L>P	chaA	nonsyn
Sample_SA3	NC_000913:1339596	A>G	EX	1339330:1340094	+	GGA>GGG	G>G	pgpB	syn
Sample_SA3	NC_000913:1350817	A>G	EX	1350251:1351039	-	TTC>CTC	F>L	fabI	nonsyn
Sample_SA3	NC_000913:1384676	A>G	EX	1384117:1385514	+	AAC>AGC	N>S	ycjX	nonsyn
Sample_SA3	NC_000913:1410258	A>G	EX	1409511:1410884	+	ACC>GCC	T>A	dbpA	nonsyn
Sample_SA3	NC_000913:1476562	A>G	EX	1475144:1477450	+	ATA>ATG	I>M	ydbD	nonsyn
Sample_SA3	NC_000913:1492629	A>G	EX	1492470:1494110	+	ACT>GCT	T>A	trg	nonsyn
Sample_SA3	NC_000913:1508167	A>C	EX	1506781:1508742	+	AAA>CAA	K>Q	ydcP	nonsyn
Sample_SA3	NC_000913:1543422	G>A	EX	1542672:1544060	-	GCC>GCT	A>A	narU	syn
Sample_SA3	NC_000913:1581425	G>A	EX	1580842:1582524	-	ACC>ATC	T>I	ydeN	nonsyn
Sample_SA3	NC_000913:1582530	T>C	IG
Sample_SA3	NC_000913:1644708	T>C	EX	1644651:1644902	-	TTA>TTG	L>L	rem	syn
Sample_SA3	NC_000913:1695963	T>C	EX	1694260:1696071	-	AGC>GGC	S>G	uidA	nonsyn
Sample_SA3	NC_000913:1773661	A>G	EX	1772512:1773777	+	ACC>GCC	T>A	ydiN	nonsyn
Sample_SA3	NC_000913:1837613	T>C	EX	1837212:1838747	+	GGT>GGC	G>G	ynjC	syn
Sample_SA3	NC_000913:1841197	A>G	EX	1840783:1841403	-	GGT>GGC	G>G	ynjF	syn
Sample_SA3	NC_000913:1864573	T>C	EX	1863850:1864734	+	TGG>CGG	W>R	yeaD	nonsyn
Sample_SA3	NC_000913:1866010	T>C	EX	1865726:1866472	-	ACC>GCC	T>A	mipA	nonsyn
Sample_SA3	NC_000913:1931341	T>C	EX	1930881:1932059	+	GTA>GCA	V>A	purT	nonsyn
Sample_SA3	NC_000913:1968157	A>G	EX	1967452:1968501	-	GGT>GGC	G>G	cheB	syn
Sample_SA3	NC_000913:1989492	G>A	IG
Sample_SA3	NC_000913:2082027	G>A	EX	2081381:2082547	-	GCA>GTA	A>V	dacD	nonsyn
Sample_SA3	NC_000913:2120746	T>C	EX	2120160:2121554	-	AAC>AGC	N>S	wcaJ	nonsyn
Sample_SA3	NC_000913:2146634	A>G	IG
Sample_SA3	NC_000913:2182996	T>C	EX	2182833:2183651	-	TAC>TGC	Y>C	yegX	nonsyn
Sample_SA3	NC_000913:2208795	T>C	EX	2207967:2209103	+	TTG>CTG	L>L	yehP	syn
Sample_SA3	NC_000913:2210709	G>A	IG
Sample_SA3	NC_000913:2339178	A>G	EX	2336793:2339420	-	GGT>GGC	G>G	gyrA	syn
Sample_SA3	NC_000913:2378040	T>C	EX	2377589:2379259	-	TAC>TGC	Y>C	menD	nonsyn
Sample_SA3	NC_000913:2455181	G>A	EX	2455083:2455646	-	CAG>TAG	Q>*	yfcV	nonsyn
Sample_SA3	NC_000913:2492666	T>C	EX	2492004:2493254	-	ACC>GCC	T>A	frc	nonsyn
Sample_SA3	NC_000913:2511445	T>C	IG
Sample_SA3	NC_000913:2512314	G>A	EX	2511468:2512706	-	GGC>GGT	G>G	mntH	syn
Sample_SA3	NC_000913:2521576	A>G	IG
Sample_SA3	NC_000913:2539869	A>G	EX	2539717:2540814	-	TAC>CAC	Y>H	cysA	nonsyn
Sample_SA3	NC_000913:2549064	T>C	EX	2548102:2549406	+	GGT>GGC	G>G	yfeW	syn
Sample_SA3	NC_000913:2573539	A>G	EX	2573502:2574305	-	GTG>GCG	V>A	eutT	nonsyn
Sample_SA3	NC_000913:2592162	A>G	EX	2591607:2592734	+	ACC>GCC	T>A	dapE	nonsyn
Sample_SA3	NC_000913:2608700	A>G	EX	2608487:2610154	+	AAC>GAC	N>D	hyfG	nonsyn
Sample_SA3	NC_000913:2623294	T>C	EX	2623044:2625110	+	GTG>GCG	V>A	ppk	nonsyn
Sample_SA3	NC_000913:2646151	G>A	EX	2645013:2647325	-	GCG>GTG	A>V	pbpC	nonsyn
Sample_SA3	NC_000913:2673286	T>C	IG
Sample_SA3	NC_000913:2686136	A>G	EX	2685835:2687025	+	CAC>CGC	H>R	hmp	nonsyn
Sample_SA3	NC_000913:2696039	T>C	EX	2695801:2697357	+	GTA>GCA	V>A	mltF	nonsyn
Sample_SA3	NC_000913:2784797	A>G	IG
Sample_SA3	NC_000913:2785949	A>G	IG
Sample_SA3	NC_000913:2795859	A>G	EX	2795674:2796336	+	AAA>AAG	K>K	csiR	syn
Sample_SA3	NC_000913:2874926	A>G	EX	2873992:2875419	-	GTG>GCG	V>A	cysN	nonsyn
Sample_SA3	NC_000913:2875012	T>C	EX	2873992:2875419	-	TTA>TTG	L>L	cysN	syn
Sample_SA3	NC_000913:2875274	T>C	EX	2873992:2875419	-	CAC>CGC	H>R	cysN	nonsyn
Sample_SA3	NC_000913:2934848	T>C	EX	2934235:2935551	+	GTA>GCA	V>A	fucP	nonsyn
Sample_SA3	NC_000913:2953234	G>A	EX	2952461:2956003	-	CTG>TTG	L>L	recB	syn
Sample_SA3	NC_000913:2973280	A>G	EX	2972669:2973862	-	TCC>CCC	S>P	lplT	nonsyn
Sample_SA3	NC_000913:3002092	A>G	EX	3000345:3002603	+	CAC>CGC	H>R	xdhA	nonsyn
Sample_SA3	NC_000913:3014817	T>C	EX	3014287:3015057	-	ACA>GCA	T>A	yqeC	nonsyn
Sample_SA3	NC_000913:3085634	G>A	EX	3083935:3085911	-	CCA>CTA	P>L	speA	nonsyn
Sample_SA3	NC_000913:3092028	C>T	EX	3091878:3092828	+	CGC>TGC	R>C	gshB	nonsyn
Sample_SA3	NC_000913:3093699	G>A	EX	3093500:3093916	+	GGC>GAC	G>D	yqgF	nonsyn
Sample_SA3	NC_000913:3116093	T>C	EX	3114550:3119112	-	AAC>AGC	N>S	sslE	nonsyn
Sample_SA3	NC_000913:3149980	G>A	EX	3149662:3150546	+	GGC>AGC	G>S	yghA	nonsyn
Sample_SA3	NC_000913:3150523	T>C	EX	3149662:3150546	+	TGC>CGC	C>R	yghA	nonsyn
Sample_SA3	NC_000913:3170075	C>T	EX	3169828:3170487	+	GCG>GTG	A>V	qseB	nonsyn
Sample_SA3	NC_000913:3199212	T>C	EX	3196801:3199641	-	ACG>GCG	T>A	glnE	nonsyn
Sample_SA3	NC_000913:3233989	C>T	EX	3233728:3234144	-	CTG>CTA	L>L	higA	syn
Sample_SA3	NC_000913:3262955	G>A	EX	3262452:3263660	-	CGC>TGC	R>C	tdcD	nonsyn
Sample_SA3	NC_000913:3265790	G>C	EX	3265039:3266028	-	GCC>GGC	A>G	tdcB	nonsyn
Sample_SA3	NC_000913:3285349	T>C	EX	3284685:3285488	+	GTC>GCC	V>A	agaC	nonsyn
Sample_SA3	NC_000913:3293459	A>G	EX	3293400:3295436	+	GCA>GCG	A>A	lpoA	syn
Sample_SA3	NC_000913:3321364	T>C	EX	3319988:3321613	-	ACC>GCC	T>A	yhbX	nonsyn
Sample_SA3	NC_000913:3327572	T>C	EX	3327035:3327664	-	TTA>TTG	L>L	rlmE	syn
Sample_SA3	NC_000913:3441197	T>C	EX	3441055:3441675	-	GAG>GGG	E>G	rpsD	nonsyn
Sample_SA3	NC_000913:3473381	T>C	EX	3471400:3473514	-	GAC>GGC	D>G	fusA	nonsyn
Sample_SA3	NC_000913:3530797	T>C	EX	3530715:3532439	-	GAT>GGT	D>G	yhgE	nonsyn
Sample_SA3	NC_000913:3556629	T>C	EX	3555833:3556849	-	CAG>CGG	Q>R	rtcA	nonsyn
Sample_SA3	NC_000913:3613353	T>C	EX	3612969:3613556	+	TTC>CTC	F>L	acpT	nonsyn
Sample_SA3	NC_000913:3637647	A>G	EX	3637642:3639141	+	CTA>CTG	L>L	pitA	syn
Sample_SA3	NC_000913:3680180	A>G	EX	3679419:3680348	+	GAA>GAG	E>E	kdgK	syn
Sample_SA3	NC_000913:3701889	T>A	EX	3701864:3702868	-	GAT>GTT	D>V	dppF	nonsyn
Sample_SA3	NC_000913:3812775	T>C	EX	3812731:3813951	+	GGT>GGC	G>G	dfp	syn
Sample_SA3	NC_000913:3842647	A>G	EX	3842455:3843789	-	GAT>GAC	D>D	yicO	syn
Sample_SA3	NC_000913:3849957	C>T	EX	3848634:3850136	-	TGG>TGA	W>*	uhpB	nonsyn
Sample_SA3	NC_000913:3854967	T>C	EX	3853922:3855106	+	GTG>GCG	V>A	emrD	nonsyn
Sample_SA3	NC_000913:3914557	A>G	EX	3913830:3915200	-	GTT>GCT	V>A	glmU	nonsyn
Sample_SA3	NC_000913:3931022	T>C	EX	3929597:3931093	-	GAA>GAG	E>E	ravA	syn
Sample_SA3	NC_000913:3967291	A>G	EX	3966417:3967676	+	AAC>AGC	N>S	rho	nonsyn
Sample_SA3	NC_000913:4005010	T>C	EX	4004862:4005731	+	TTC>TCC	F>S	pldA	nonsyn
Sample_SA3	NC_000913:4014008	T>C	EX	4013053:4015314	+	GTG>GCG	V>A	metE	nonsyn
Sample_SA3	NC_000913:4100961	A>G	EX	4100810:4101430	+	AAC>AGC	N>S	sodA	nonsyn
Sample_SA3	NC_000913:4101322	A>G	EX	4100810:4101430	+	GAA>GAG	E>E	sodA	syn
Sample_SA3	NC_000913:4141543	A>G	EX	4139720:4142221	-	TCC>CCC	S>P	frwA	nonsyn
Sample_SA3	NC_000913:4144064	G>A	EX	4143995:4146292	+	GCG>ACG	A>T	pflD	nonsyn
Sample_SA3	NC_000913:4221855	A>G	EX	4220301:4222487	-	GCT>GCC	A>A	arpA	syn
Sample_SA3	NC_000913:4308195	G>A	EX	4307783:4308478	-	GCG>GTG	A>V	alsE	nonsyn
Sample_SA3	NC_000913:4330183	C>T	EX	4329360:4330238	+	GCG>GTG	A>V	yjcZ	nonsyn
Sample_SA3	NC_000913:4351713	T>C	IG
Sample_SA3	NC_000913:4365205	T>C	EX	4365018:4365356	-	TAC>TGC	Y>C	cutA	nonsyn
Sample_SA3	NC_000913:4366370	A>G	EX	4365472:4366773	-	GTA>GCA	V>A	dcuA	nonsyn
Sample_SA3	NC_000913:4405481	T>C	EX	4404687:4405985	+	GGT>GGC	G>G	purA	syn
Sample_SA3	NC_000913:4517000	T>C	EX	4516764:4517717	-	ACA>GCA	T>A	fecR	nonsyn
Sample_SA3	NC_000913:4544886	A>G	EX	4544304:4545029	+	ACC>GCC	T>A	fimC	nonsyn
Sample_SA3	NC_000913:4617271	T>C	IG
Sample_SA6	NC_000913:26158	C>T	EX	25826:26275	+	GGC>GGT	G>G	fkpB	syn
Sample_SA6	NC_000913:27333	A>G	EX	27293:28207	+	GAC>GGC	D>G	rihC	nonsyn
Sample_SA6	NC_000913:71971	T>G	EX	71351:72115	+	CGT>CGG	R>R	yabI	syn
Sample_SA6	NC_000913:102889	T>C	EX	102233:103153	+	GAT>GAC	D>D	ddlB	syn
Sample_SA6	NC_000913:167158	A>G	EX	164730:167264	+	CAG>CGG	Q>R	mrcB	nonsyn
Sample_SA6	NC_000913:212351	A>G	EX	212331:213629	+	AGA>AGG	R>R	tilS	syn
Sample_SA6	NC_000913:298509	A>G	EX	297770:298726	-	GTC>GCC	V>A	paoD	nonsyn
Sample_SA6	NC_000913:306693	T>A	EX	305174:306817	-	GAA>GTA	E>V	ecpD	nonsyn
Sample_SA6	NC_000913:350538	T>C	EX	350012:351181	+	CTG>CCG	L>P	prpC	nonsyn
Sample_SA6	NC_000913:407709	T>C	EX	407428:408105	+	ATT>ATC	I>I	aroM	syn
Sample_SA6	NC_000913:459607	A>G	EX	458888:461242	+	GAA>GAG	E>E	lon	syn
Sample_SA6	NC_000913:653059	C>T	EX	652235:653893	+	CCC>CCT	P>P	citA	syn
Sample_SA6	NC_000913:771220	A>G	IG
Sample_SA6	NC_000913:793827	A>G	IG
Sample_SA6	NC_000913:862519	T>C	EX	860174:862606	-	ACC>GCC	T>A	ybiW	nonsyn
Sample_SA6	NC_000913:900142	T>C	EX	899844:900575	-	CAC>CGC	H>R	artJ	nonsyn
Sample_SA6	NC_000913:999968	T>C	EX	999216:1001816	+	GGT>GGC	G>G	elfC	syn
Sample_SA6	NC_000913:1077255	A>G	EX	1074920:1078882	-	GTT>GCT	V>A	putA	nonsyn
Sample_SA6	NC_000913:1098653	A>G	EX	1097886:1098824	+	GAA>GAG	E>E	ghrA	syn
Sample_SA6	NC_000913:1156112	T>C	EX	1155762:1156766	+	GCT>GCC	A>A	holB	syn
Sample_SA6	NC_000913:1179693	T>C	EX	1179631:1180359	+	CGT>CGC	R>R	cobB	syn
Sample_SA6	NC_000913:1233984	A>G	EX	1233176:1234717	-	GTG>GCG	V>A	nhaB	nonsyn
Sample_SA6	NC_000913:1287161	G>A	EX	1287087:1287176	-	CAA>TAA	Q>*	tpr	nonsyn
Sample_SA6	NC_000913:1309641	A>G	EX	1309016:1310269	-	ATT>ACT	I>T	kch	nonsyn
Sample_SA6	NC_000913:1315232	T>C	IG
Sample_SA6	NC_000913:1319995	T>C	EX	1319789:1321384	-	ACA>GCA	T>A	trpD	nonsyn
Sample_SA6	NC_000913:1324016	G>A	EX	1323220:1324101	+	GGT>GAT	G>D	yciV	nonsyn
Sample_SA6	NC_000913:1365094	A>G	EX	1364232:1365512	+	TAC>TGC	Y>C	puuB	nonsyn
Sample_SA6	NC_000913:1437182	T>C	IG
Sample_SA6	NC_000913:1467082	G>A	IG
Sample_SA6	NC_000913:1488862	A>G	EX	1488232:1489671	+	ACC>GCC	T>A	aldA	nonsyn
Sample_SA6	NC_000913:1489483	C>T	EX	1488232:1489671	+	CAA>TAA	Q>*	aldA	nonsyn
Sample_SA6	NC_000913:1558538	A>G	EX	1558031:1559017	-	GGT>GGC	G>G	ddpD	syn
Sample_SA6	NC_000913:1560804	A>G	EX	1559907:1560929	-	GGT>GGC	G>G	ddpB	syn
Sample_SA6	NC_000913:1585449	T>C	EX	1584207:1586486	-	ACA>ACG	T>T	ydeP	syn
Sample_SA6	NC_000913:1619005	G>A	IG
Sample_SA6	NC_000913:1646634	A>G	EX	1646405:1646737	+	CAG>CGG	Q>R	flxA	nonsyn
Sample_SA6	NC_000913:1648047	A>G	EX	1647934:1648341	+	TCA>TCG	S>S	dicA	syn
Sample_SA6	NC_000913:1679116	C>T	EX	1678427:1679371	+	ACC>ACT	T>T	ydgH	syn
Sample_SA6	NC_000913:1759666	A>G	EX	1759303:1760523	-	GGT>GGC	G>G	sufS	syn
Sample_SA6	NC_000913:1780253	G>A	EX	1779617:1780381	+	GCG>ACG	A>T	ydiQ	nonsyn
Sample_SA6	NC_000913:1796910	A>G	EX	1795557:1797944	-	GGT>GGC	G>G	pheT	syn
Sample_SA6	NC_000913:1808000	A>G	EX	1807796:1808656	+	AAA>GAA	K>E	yniA	nonsyn
Sample_SA6	NC_000913:1812121	C>T	EX	1810934:1812325	+	GCC>GCT	A>A	ydjN	syn
Sample_SA6	NC_000913:1821785	T>C	IG
Sample_SA6	NC_000913:1893669	C>T	EX	1893367:1893711	+	AAC>AAT	N>N	yoaB	syn
Sample_SA6	NC_000913:1902518	G>A	EX	1902048:1903019	+	GGG>GGA	G>G	manX	syn
Sample_SA6	NC_000913:1940348	C>A	EX	1940313:1941635	-	GCC>TCC	A>S	mepM	nonsyn
Sample_SA6	NC_000913:1966157	G>A	EX	1965043:1966191	-	CCC>CTC	P>L	flhB	nonsyn
Sample_SA6	NC_000913:1975489	A>G	EX	1975329:1976255	-	GTC>GCC	V>A	motB	nonsyn
Sample_SA6	NC_000913:2031881	A>G	EX	2030899:2032317	-	CTC>CCC	L>P	dcm	nonsyn
Sample_SA6	NC_000913:2046255	A>G	EX	2044938:2052014	+	ACA>GCA	T>A	yeeJ	nonsyn
Sample_SA6	NC_000913:2051782	T>C	EX	2044938:2052014	+	CTC>CCC	L>P	yeeJ	nonsyn
Sample_SA6	NC_000913:2108206	T>C	EX	2107226:2108329	-	ACA>GCA	T>A	glf	nonsyn
Sample_SA6	NC_000913:2206865	G>A	EX	2205695:2207974	+	GCG>ACG	A>T	yehM	nonsyn
Sample_SA6	NC_000913:2228604	A>G	IG
Sample_SA6	NC_000913:2283721	T>C	EX	2282940:2283947	-	GAC>GGC	D>G	yejK	nonsyn
Sample_SA6	NC_000913:2298582	G>A	EX	2298269:2298718	-	GCC>GTC	A>V	napB	nonsyn
Sample_SA6	NC_000913:2305634	T>C	EX	2305108:2306754	-	CAC>CGC	H>R	mqo	nonsyn
Sample_SA6	NC_000913:2339427	G>A	IG
Sample_SA6	NC_000913:2344054	A>G	EX	2340417:2344169	-	GTC>GCC	V>A	yfaL	nonsyn
Sample_SA6	NC_000913:2381057	A>G	IG
Sample_SA6	NC_000913:2429343	A>G	EX	2428721:2430238	-	GTG>GCG	V>A	purF	nonsyn
Sample_SA6	NC_000913:2432916	G>A	EX	2431674:2432942	-	GCC>GCT	A>A	folC	syn
Sample_SA6	NC_000913:2528914	T>C	EX	2528161:2530176	-	GAA>GAG	E>E	ligA	syn
Sample_SA6	NC_000913:2593162	A>G	EX	2593072:2593770	-	GAT>GAC	D>D	ypfH	syn
Sample_SA6	NC_000913:2599574	T>C	EX	2598882:2599760	-	ACG>GCG	T>A	dapA	nonsyn
Sample_SA6	NC_000913:2621760	T>C	EX	2621197:2622234	+	GGT>GGC	G>G	purM	syn
Sample_SA6	NC_000913:2627889	A>G	EX	2626695:2628938	-	GAT>GAC	D>D	yfgF	syn
Sample_SA6	NC_000913:2645801	C>T	EX	2645013:2647325	-	GCA>ACA	A>T	pbpC	nonsyn
Sample_SA6	NC_000913:2661717	A>G	EX	2661643:2662131	-	TCT>CCT	S>P	iscR	nonsyn
Sample_SA6	NC_000913:2688006	A>G	EX	2687469:2688803	-	ATT>ATC	I>I	glrR	syn
Sample_SA6	NC_000913:2710018	G>A	IG
Sample_SA6	NC_000913:2735466	A>G	EX	2735031:2736011	-	GGT>GGC	G>G	rluD	syn
Sample_SA6	NC_000913:2756462	G>A	EX	2756159:2757400	+	GCC>ACC	A>T	intA	nonsyn
Sample_SA6	NC_000913:2837546	T>C	IG
Sample_SA6	NC_000913:2865862	T>C	EX	2865101:2866465	+	GGT>GGC	G>G	ygbN	syn
Sample_SA6	NC_000913:2871052	T>C	EX	2870255:2871304	-	ACG>GCG	T>A	truD	nonsyn
Sample_SA6	NC_000913:2965276	A>G	EX	2965162:2966037	-	GGT>GGC	G>G	lgt	syn
Sample_SA6	NC_000913:2982448	T>C	IG
Sample_SA6	NC_000913:2985530	T>C	EX	2984411:2985592	-	TTA>TTG	L>L	yqeF	syn
Sample_SA6	NC_000913:3057204	T>C	EX	3057178:3058410	-	ACC>GCC	T>A	serA	nonsyn
Sample_SA6	NC_000913:3097467	T>C	EX	3097267:3098403	+	GGT>GGC	G>G	yggW	syn
Sample_SA6	NC_000913:3177389	T>C	EX	3177281:3177910	-	GAA>GAG	E>E	nudF	syn
Sample_SA6	NC_000913:3200466	T>C	EX	3199664:3200965	-	GAC>GGC	D>G	ygiF	nonsyn
Sample_SA6	NC_000913:3225035	T>C	EX	3222633:3225725	+	GGT>GGC	G>G	ebgA	syn
Sample_SA6	NC_000913:3229005	T>C	EX	3228888:3231239	+	TAC>CAC	Y>H	ygjK	nonsyn
Sample_SA6	NC_000913:3238067	T>C	EX	3237311:3238297	+	TCT>CCT	S>P	ygjR	nonsyn
Sample_SA6	NC_000913:3286913	G>A	EX	3286270:3287025	+	GGC>GAC	G>D	agaI	nonsyn
Sample_SA6	NC_000913:3299221	A>T	EX	3298974:3299492	+	GAC>GTC	D>V	yhbO	nonsyn
Sample_SA6	NC_000913:3328498	T>C	EX	3328239:3328715	-	CAG>CGG	Q>R	greA	nonsyn
Sample_SA6	NC_000913:3338901	T>C	EX	3338466:3339248	-	CTA>CTG	L>L	mlaE	syn
Sample_SA6	NC_000913:3372480	T>C	EX	3371084:3372574	-	GAC>GGC	D>G	nanT	nonsyn
Sample_SA6	NC_000913:3432736	T>C	EX	3432436:3433560	-	GAA>GAG	E>E	smf	syn
Sample_SA6	NC_000913:3439189	T>C	EX	3439141:3439509	-	TTA>TTG	L>L	yhdN	syn
Sample_SA6	NC_000913:3443747	G>A	EX	3442766:3444097	-	AGC>AGT	S>S	secY	syn
Sample_SA6	NC_000913:3448349	T>C	EX	3448314:3448568	-	ACG>GCG	T>A	rpsQ	nonsyn
Sample_SA6	NC_000913:3538731	T>C	EX	3537385:3539706	+	CGT>CGC	R>R	yhgF	syn
Sample_SA6	NC_000913:3546703	T>C	EX	3546559:3547875	+	TCC>CCC	S>P	gntT	nonsyn
Sample_SA6	NC_000913:3581191	G>A	EX	3581138:3581626	+	AGG>AGA	R>R	yhhY	syn
Sample_SA6	NC_000913:3603421	T>C	EX	3602750:3604243	-	ATG>GTG	M>V	ftsY	nonsyn
Sample_SA6	NC_000913:3684838	C>T	EX	3683630:3685618	-	GAG>AAG	E>K	yhjK	nonsyn
Sample_SA6	NC_000913:3726610	C>T	EX	3725887:3726882	+	CCG>TCG	P>S	wecH	nonsyn
Sample_SA6	NC_000913:3823271	T>C	EX	3822400:3824508	+	GTG>GCG	V>A	spoT	nonsyn
Sample_SA6	NC_000913:3830454	A>G	IG
Sample_SA6	NC_000913:3843708	T>C	EX	3842455:3843789	-	ACC>GCC	T>A	yicO	nonsyn
Sample_SA6	NC_000913:3863239	A>G	IG
Sample_SA6	NC_000913:3877505	T>C	IG
Sample_SA6	NC_000913:3897920	A>G	EX	3897506:3897973	+	ACC>GCC	T>A	cbrB	nonsyn
Sample_SA6	NC_000913:3913391	T>C	EX	3911839:3913668	-	CAC>CGC	H>R	glmS	nonsyn
Sample_SA6	NC_000913:3931930	T>C	EX	3931316:3933184	+	CAT>CAC	H>H	kup	syn
Sample_SA6	NC_000913:3949966	A>G	EX	3948449:3949969	-	TCA>CCA	S>P	yifB	nonsyn
Sample_SA6	NC_000913:3992929	A>G	EX	3991153:3993699	+	AGC>GGC	S>G	cyaA	nonsyn
Sample_SA6	NC_000913:4075345	A>G	EX	4074669:4075454	+	AAC>AGC	N>S	yihW	nonsyn
Sample_SA6	NC_000913:4188411	A>G	EX	4185350:4189573	+	GAC>GGC	D>G	rpoC	nonsyn
Sample_SA6	NC_000913:4217050	A>G	EX	4215478:4217079	+	ACC>GCC	T>A	aceB	nonsyn
Sample_SA6	NC_000913:4224569	G>A	EX	4223828:4227511	+	GCG>ACG	A>T	metH	nonsyn
Sample_SA6	NC_000913:4233941	A>G	EX	4233758:4235407	+	ACG>GCG	T>A	pgi	nonsyn
Sample_SA6	NC_000913:4297765	T>C	EX	4297219:4299366	-	TCA>TCG	S>S	fdhF	syn
Sample_SA6	NC_000913:4366061	A>G	EX	4365472:4366773	-	GTT>GCT	V>A	dcuA	nonsyn
Sample_SA6	NC_000913:4395664	G>A	EX	4395585:4396046	+	GGC>GAC	G>D	tsaE	nonsyn
Sample_SA6	NC_000913:4533111	A>G	EX	4532437:4533183	-	TAC>CAC	Y>H	yjhP	nonsyn
Sample_SA6	NC_000913:4564238	A>G	EX	4563922:4564689	-	GTC>GCC	V>A	yjiL	nonsyn
Sample_SA6	NC_000913:4589741	G>T	EX	4589129:4591279	-	CGC>CGA	R>R	yjiY	syn
Sample_SA7	NC_000913:36017	A>G	EX	35377:36162	-	GTC>GCC	V>A	caiD	nonsyn
Sample_SA7	NC_000913:41317	A>G	EX	40417:41931	-	GGT>GGC	G>G	caiT	syn
Sample_SA7	NC_000913:103049	A>G	EX	102233:103153	+	ACC>GCC	T>A	ddlB	nonsyn
Sample_SA7	NC_000913:110383	A>G	EX	108279:110984	+	GAT>GGT	D>G	secA	nonsyn
Sample_SA7	NC_000913:111642	A>G	IG
Sample_SA7	NC_000913:123253	A>G	EX	123017:125680	+	GAA>GAG	E>E	aceE	syn
Sample_SA7	NC_000913:167685	A>G	EX	167484:169727	+	ACC>GCC	T>A	fhuA	nonsyn
Sample_SA7	NC_000913:173376	G>A	EX	171462:173444	+	GCG>ACG	A>T	fhuB	nonsyn
Sample_SA7	NC_000913:173965	T>C	EX	173602:174882	-	GCA>GCG	A>A	hemL	syn
Sample_SA7	NC_000913:174712	A>G	EX	173602:174882	-	GGT>GGC	G>G	hemL	syn
Sample_SA7	NC_000913:182554	C>T	EX	182463:183620	+	GCC>GTC	A>V	cdaR	nonsyn
Sample_SA7	NC_000913:185448	A>G	EX	185123:185947	-	GTG>GCG	V>A	dapD	nonsyn
Sample_SA7	NC_000913:196353	T>C	EX	195677:196534	+	GTC>GCC	V>A	cdsA	nonsyn
Sample_SA7	NC_000913:240385	A>G	EX	240343:240816	+	ACG>GCG	T>A	ivy	nonsyn
Sample_SA7	NC_000913:249226	T>C	IG
Sample_SA7	NC_000913:310483	A>G	EX	310084:310671	-	GGT>GGC	G>G	ecpA	syn
Sample_SA7	NC_000913:326526	T>C	EX	325577:327247	-	GAC>GGC	D>G	betA	nonsyn
Sample_SA7	NC_000913:382803	A>G	EX	382739:383935	-	GTG>GCG	V>A	yaiP	nonsyn
Sample_SA7	NC_000913:387901	A>G	EX	387795:388646	+	TAC>TGC	Y>C	tauD	nonsyn
Sample_SA7	NC_000913:409327	T>C	EX	409108:410019	-	AAA>AAG	K>K	rdgC	syn
Sample_SA7	NC_000913:416717	A>G	EX	415750:416952	-	GTA>GCA	V>A	sbcD	nonsyn
Sample_SA7	NC_000913:427379	T>C	EX	427287:427619	+	GGT>GGC	G>G	yajC	syn
Sample_SA7	NC_000913:428540	A>G	EX	427647:429494	+	GTA>GTG	V>V	secD	syn
Sample_SA7	NC_000913:435441	T>C	EX	435137:435556	+	GTG>GCG	V>A	nusB	nonsyn
Sample_SA7	NC_000913:435864	A>G	EX	435634:436611	+	GCA>GCG	A>A	thiL	syn
Sample_SA7	NC_000913:453091	T>C	EX	452070:453545	-	TAC>TGC	Y>C	ampG	nonsyn
Sample_SA7	NC_000913:469512	T>C	EX	468871:470643	+	GGT>GGC	G>G	mdlA	syn
Sample_SA7	NC_000913:654617	A>G	EX	654583:655968	-	GTG>GCG	V>A	dcuC	nonsyn
Sample_SA7	NC_000913:704486	C>T	EX	703944:705890	+	AAC>AAT	N>N	nagE	syn
Sample_SA7	NC_000913:714776	A>G	EX	713558:715198	+	ACC>GCC	T>A	pgm	nonsyn
Sample_SA7	NC_000913:729096	T>C	IG
Sample_SA7	NC_000913:743179	T>A	EX	742827:743570	+	ATC>AAC	I>N	ybgI	nonsyn
Sample_SA7	NC_000913:762369	T>C	EX	761522:762739	+	GTT>GCT	V>A	sucB	nonsyn
Sample_SA7	NC_000913:789394	T>C	EX	788831:789979	-	ACC>GCC	T>A	galK	nonsyn
Sample_SA7	NC_000913:828683	T>C	EX	827245:828981	-	AAC>AGC	N>S	ybhF	nonsyn
Sample_SA7	NC_000913:902581	T>C	EX	902257:902988	-	ACA>ACG	T>T	artI	syn
Sample_SA7	NC_000913:927857	A>C	EX	927474:929195	-	TCG>GCG	S>A	cydC	nonsyn
Sample_SA7	NC_000913:947451	A>G	EX	947229:948659	+	ACC>GCC	T>A	ycaM	nonsyn
Sample_SA7	NC_000913:954349	T>C	EX	953609:954466	-	ACC>GCC	T>A	focA	nonsyn
Sample_SA7	NC_000913:976718	G>A	EX	976326:980786	+	CAG>CAA	Q>Q	mukB	syn
Sample_SA7	NC_000913:1018273	A>G	EX	1016539:1018299	-	CGT>CGC	R>R	ycbZ	syn
Sample_SA7	NC_000913:1025649	C>T	EX	1024471:1026525	+	GCC>GCT	A>A	helD	syn
Sample_SA7	NC_000913:1037973	T>C	EX	1037740:1039284	+	GGT>GGC	G>G	cbdA	syn
Sample_SA7	NC_000913:1048462	T>C	EX	1047945:1048691	-	GAC>GGC	D>G	gfcC	nonsyn
Sample_SA7	NC_000913:1119298	T>C	IG
Sample_SA7	NC_000913:1242523	T>C	EX	1242166:1243080	-	ACA>ACG	T>T	ldcA	syn
Sample_SA7	NC_000913:1246588	A>G	EX	1245679:1247376	-	GGT>GGC	G>G	treA	syn
Sample_SA7	NC_000913:1281218	T>C	EX	1279864:1283607	+	CTG>CCG	L>P	narG	nonsyn
Sample_SA7	NC_000913:1293953	A>G	EX	1293527:1294144	+	ACC>GCC	T>A	tdk	nonsyn
Sample_SA7	NC_000913:1296856	A>G	EX	1295446:1298121	-	GGT>GGC	G>G	adhE	syn
Sample_SA7	NC_000913:1302773	A>G	EX	1301182:1302813	+	GAT>GGT	D>G	oppA	nonsyn
Sample_SA7	NC_000913:1315080	T>C	EX	1314718:1315224	-	ACC>GCC	T>A	yciE	nonsyn
Sample_SA7	NC_000913:1315602	G>A	EX	1315270:1315770	-	CGT>TGT	R>C	yciF	nonsyn
Sample_SA7	NC_000913:1360370	G>A	EX	1359490:1360908	-	GCG>GTG	A>V	puuA	nonsyn
Sample_SA7	NC_000913:1364077	A>G	EX	1362743:1364230	+	AAA>AAG	K>K	puuC	syn
Sample_SA7	NC_000913:1366362	C>A	EX	1365550:1366815	+	GGC>GGA	G>G	puuE	syn
Sample_SA7	NC_000913:1382023	A>G	EX	1381947:1382852	+	GAC>GGC	D>G	ompG	nonsyn
Sample_SA7	NC_000913:1394146	A>G	EX	1393227:1394840	+	CAG>CGG	Q>R	mppA	nonsyn
Sample_SA7	NC_000913:1399370	G>A	EX	1398774:1399526	-	CAG>TAG	Q>*	fnr	nonsyn
Sample_SA7	NC_000913:1415365	A>G	EX	1414786:1417386	-	CGT>CGC	R>R	recE	syn
Sample_SA7	NC_000913:1490732	A>G	IG
Sample_SA7	NC_000913:1518238	A>G	EX	1517882:1518331	-	TCT>CCT	S>P	ydcZ	nonsyn
Sample_SA7	NC_000913:1525101	A>G	EX	1524481:1525980	-	TTT>CTT	F>L	ansP	nonsyn
Sample_SA7	NC_000913:1578088	A>C	EX	1577657:1579342	-	TGG>GGG	W>G	yddA	nonsyn
Sample_SA7	NC_000913:1579724	A>G	EX	1579633:1580790	-	GTA>GCA	V>A	ydeM	nonsyn
Sample_SA7	NC_000913:1617935	T>C	EX	1617028:1618218	+	GTG>GCG	V>A	ydeA	nonsyn
Sample_SA7	NC_000913:1697953	T>C	EX	1697273:1698040	-	ACA>GCA	T>A	hdhA	nonsyn
Sample_SA7	NC_000913:1701463	T>C	EX	1700957:1702129	+	TGT>TGC	C>C	malY	syn
Sample_SA7	NC_000913:1706439	T>C	EX	1706348:1706926	+	GTG>GCG	V>A	rsxB	nonsyn
Sample_SA7	NC_000913:1729836	A>G	EX	1729087:1733703	+	GTA>GTG	V>V	lhr	syn
Sample_SA7	NC_000913:1741791	T>C	EX	1741413:1742561	+	TTC>CTC	F>L	cfa	nonsyn
Sample_SA7	NC_000913:1749699	T>C	EX	1749563:1750348	-	TAC>TGC	Y>C	ydhU	nonsyn
Sample_SA7	NC_000913:1767361	A>G	EX	1765629:1768685	-	CTG>CCG	L>P	ydiJ	nonsyn
Sample_SA7	NC_000913:1792333	T>C	EX	1792267:1792731	-	GGA>GGG	G>G	nlpC	syn
Sample_SA7	NC_000913:1805836	T>C	EX	1805325:1806083	-	AAC>AGC	N>S	ydiY	nonsyn
Sample_SA7	NC_000913:1824386	A>G	EX	1824362:1824937	-	GGT>GGC	G>G	ves	syn
Sample_SA7	NC_000913:1847324	T>C	EX	1846965:1848008	-	ACG>GCG	T>A	selD	nonsyn
Sample_SA7	NC_000913:1873185	A>G	EX	1872041:1873531	+	GAC>GGC	D>G	yeaJ	nonsyn
Sample_SA7	NC_000913:1899841	T>C	EX	1898427:1900025	+	GTG>GCG	V>A	yoaD	nonsyn
Sample_SA7	NC_000913:1913057	T>C	EX	1912768:1914816	-	AAC>AGC	N>S	prc	nonsyn
Sample_SA7	NC_000913:1922889	A>G	EX	1922313:1922969	-	GGT>GGC	G>G	pphA	syn
Sample_SA7	NC_000913:1928173	T>C	EX	1926779:1928839	-	ACC>GCC	T>A	ptrB	nonsyn
Sample_SA7	NC_000913:1949754	G>A	EX	1948750:1950522	-	CTG>TTG	L>L	aspS	syn
Sample_SA7	NC_000913:1964137	A>G	EX	1962972:1965050	-	GTG>GCG	V>A	flhA	nonsyn
Sample_SA7	NC_000913:1996510	T>C	EX	1996110:1996832	-	GAA>GGA	E>G	sdiA	nonsyn
Sample_SA7	NC_000913:2001212	T>C	EX	2001070:2001789	-	GAA>GGA	E>G	fliA	nonsyn
Sample_SA7	NC_000913:2002232	C>T	EX	2002110:2003606	-	GCC>ACC	A>T	fliC	nonsyn
Sample_SA7	NC_000913:2010022	T>C	EX	2009821:2010489	+	TGG>CGG	W>R	yedK	nonsyn
Sample_SA7	NC_000913:2032093	T>C	EX	2030899:2032317	-	TTA>TTG	L>L	dcm	syn
Sample_SA7	NC_000913:2077580	A>G	EX	2077569:2077943	+	TTA>TTG	L>L	cbtA	syn
Sample_SA7	NC_000913:2130613	A>G	EX	2129661:2130878	-	GTC>GCC	V>A	wcaD	nonsyn
Sample_SA7	NC_000913:2162793	G>A	EX	2161464:2162879	+	GCC>ACC	A>T	mdtD	nonsyn
Sample_SA7	NC_000913:2179100	T>C	EX	2178821:2180098	+	TTC>CTC	F>L	yegT	nonsyn
Sample_SA7	NC_000913:2192659	A>G	EX	2192515:2192796	-	GGT>GGC	G>G	yehE	syn
Sample_SA7	NC_000913:2253237	A>G	EX	2252895:2254145	-	GCT>GCC	A>A	nupX	syn
Sample_SA7	NC_000913:2267147	T>C	EX	2266245:2267711	+	TTT>TTC	F>F	yeiQ	syn
Sample_SA7	NC_000913:2281481	A>G	EX	2280632:2282392	+	ACC>GCC	T>A	yejH	nonsyn
Sample_SA7	NC_000913:2286191	T>C	IG
Sample_SA7	NC_000913:2302881	T>C	EX	2302750:2303013	-	ATT>GTT	I>V	napD	nonsyn
Sample_SA7	NC_000913:2311336	T>C	EX	2310479:2311534	-	ACC>GCC	T>A	apbE	nonsyn
Sample_SA7	NC_000913:2321732	A>G	EX	2320043:2321869	+	ACC>GCC	T>A	atoS	nonsyn
Sample_SA7	NC_000913:2325145	A>G	EX	2324756:2326078	+	CGA>CGG	R>R	atoE	syn
Sample_SA7	NC_000913:2331268	T>C	IG
Sample_SA7	NC_000913:2335942	T>C	EX	2334956:2336644	-	AGC>GGC	S>G	yfaA	nonsyn
Sample_SA7	NC_000913:2343324	A>G	EX	2340417:2344169	-	GGT>GGC	G>G	yfaL	syn
Sample_SA7	NC_000913:2345829	A>G	EX	2344865:2347150	+	AAC>AGC	N>S	nrdA	nonsyn
Sample_SA7	NC_000913:2416528	T>C	EX	2414747:2416891	+	GGT>GGC	G>G	pta	syn
Sample_SA7	NC_000913:2443706	C>T	EX	2441764:2443770	+	GCG>GTG	A>V	mnmC	nonsyn
Sample_SA7	NC_000913:2453252	T>C	IG
Sample_SA7	NC_000913:2471383	T>C	EX	2471077:2471517	-	TTA>TTG	L>L	yfdK	syn
Sample_SA7	NC_000913:2484975	T>C	EX	2484374:2487967	+	GTC>GCC	V>A	evgS	nonsyn
Sample_SA7	NC_000913:2504524	T>C	EX	2504510:2505547	-	ACG>GCG	T>A	ypdE	nonsyn
Sample_SA7	NC_000913:2546340	A>G	EX	2545773:2546669	+	ACC>GCC	T>A	murQ	nonsyn
Sample_SA7	NC_000913:2566223	A>G	EX	2565481:2566884	-	GTG>GCG	V>A	eutA	nonsyn
Sample_SA7	NC_000913:2582551	T>C	EX	2581734:2582777	-	AAG>AGG	K>R	ypfG	nonsyn
Sample_SA7	NC_000913:2604788	T>C	EX	2603847:2604794	+	GGT>GGC	G>G	hyfC	syn
Sample_SA7	NC_000913:2626798	A>G	EX	2626695:2628938	-	GTG>GCG	V>A	yfgF	nonsyn
Sample_SA7	NC_000913:2686425	T>C	EX	2685835:2687025	+	GGT>GGC	G>G	hmp	syn
Sample_SA7	NC_000913:2710575	T>C	EX	2710420:2712042	+	GGT>GGC	G>G	nadB	syn
Sample_SA7	NC_000913:2747656	A>G	EX	2746434:2747795	-	GTA>GCA	V>A	ffh	nonsyn
Sample_SA7	NC_000913:2791572	A>G	EX	2791273:2792721	+	AAA>AAG	K>K	gabD	syn
Sample_SA7	NC_000913:2807817	T>C	EX	2807132:2808124	+	GTG>GCG	V>A	proX	nonsyn
Sample_SA7	NC_000913:2819883	T>C	EX	2819381:2822011	-	GAC>GGC	D>G	alaS	nonsyn
Sample_SA7	NC_000913:2824759	A>G	EX	2824491:2825576	-	GTA>GCA	V>A	mltB	nonsyn
Sample_SA7	NC_000913:2824958	G>A	EX	2824491:2825576	-	CAG>TAG	Q>*	mltB	nonsyn
Sample_SA7	NC_000913:2838206	A>G	IG
Sample_SA7	NC_000913:2926667	G>A	EX	2926308:2927672	+	CTG>CTA	L>L	ygdH	syn
Sample_SA7	NC_000913:2926922	T>C	EX	2926308:2927672	+	CGT>CGC	R>R	ygdH	syn
Sample_SA7	NC_000913:2931404	C>T	EX	2931055:2931810	+	GCC>GTC	A>V	ygdG	nonsyn
Sample_SA7	NC_000913:2952478	T>C	EX	2952461:2956003	-	ACC>GCC	T>A	recB	nonsyn
Sample_SA7	NC_000913:2954319	T>C	EX	2952461:2956003	-	CAG>CGG	Q>R	recB	nonsyn
Sample_SA7	NC_000913:2958638	A>G	EX	2955996:2958884	-	TAC>CAC	Y>H	ptrA	nonsyn
Sample_SA7	NC_000913:2973870	T>C	EX	2973855:2976014	-	GAA>GAG	E>E	aas	syn
Sample_SA7	NC_000913:3034537	A>G	EX	3033657:3035174	-	GTG>GCG	V>A	lysS	nonsyn
Sample_SA7	NC_000913:3074961	T>C	EX	3074686:3075195	-	AAA>GAA	K>E	yggD	nonsyn
Sample_SA7	NC_000913:3117368	T>C	EX	3114550:3119112	-	AAC>AGC	N>S	sslE	nonsyn
Sample_SA7	NC_000913:3162900	A>G	EX	3162744:3163481	-	GGT>GGC	G>G	plsC	syn
Sample_SA7	NC_000913:3164971	C>T	EX	3163715:3165973	-	GAT>AAT	D>N	parC	nonsyn
Sample_SA7	NC_000913:3165556	T>C	EX	3163715:3165973	-	ACG>GCG	T>A	parC	nonsyn
Sample_SA7	NC_000913:3175148	A>C	EX	3173504:3175396	-	GGT>GGG	G>G	parE	syn
Sample_SA7	NC_000913:3195311	G>A	IG
Sample_SA7	NC_000913:3199707	G>A	EX	3199664:3200965	-	GCA>GTA	A>V	ygiF	nonsyn
Sample_SA7	NC_000913:3200080	A>G	EX	3199664:3200965	-	TCT>CCT	S>P	ygiF	nonsyn
Sample_SA7	NC_000913:3206218	T>C	EX	3205324:3206256	-	GTA>GTG	V>V	ttdR	syn
Sample_SA7	NC_000913:3215111	T>C	EX	3214967:3215473	-	GCA>GCG	A>A	mug	syn
Sample_SA7	NC_000913:3230672	T>C	EX	3228888:3231239	+	GGT>GGC	G>G	ygjK	syn
Sample_SA7	NC_000913:3231173	A>G	EX	3228888:3231239	+	GCA>GCG	A>A	ygjK	syn
Sample_SA7	NC_000913:3263316	T>C	EX	3262452:3263660	-	GCA>GCG	A>A	tdcD	syn
Sample_SA7	NC_000913:3340622	T>C	EX	3340275:3341252	+	GGT>GGC	G>G	yrbG	syn
Sample_SA7	NC_000913:3378740	T>C	IG
Sample_SA7	NC_000913:3396984	T>C	EX	3396326:3397795	-	GAT>GGT	D>G	rng	nonsyn
Sample_SA7	NC_000913:3442925	C>T	EX	3442766:3444097	-	ATG>ATA	M>I	secY	nonsyn
Sample_SA7	NC_000913:3464671	T>C	EX	3463922:3465085	+	TGT>TGC	C>C	gspL	syn
Sample_SA7	NC_000913:3484840	G>A	EX	3484490:3485359	+	TGG>TGA	W>*	prkB	nonsyn
Sample_SA7	NC_000913:3506264	T>C	EX	3506032:3507336	-	AAC>AGC	N>S	yhfT	nonsyn
Sample_SA7	NC_000913:3508104	T>C	EX	3507712:3508590	-	ACG>GCG	T>A	php	nonsyn
Sample_SA7	NC_000913:3573897	G>A	EX	3573775:3574878	-	CCG>TCG	P>S	asd	nonsyn
Sample_SA7	NC_000913:3612241	A>G	EX	3611865:3612914	+	CAG>CGG	Q>R	yhhT	nonsyn
Sample_SA7	NC_000913:3632669	A>G	IG
Sample_SA7	NC_000913:3662823	T>C	EX	3660414:3663527	+	TCT>CCT	S>P	mdtF	nonsyn
Sample_SA7	NC_000913:3778445	T>C	EX	3777399:3779054	+	CGT>CGC	R>R	lldP	syn
Sample_SA7	NC_000913:3877883	T>C	EX	3877705:3880119	-	AAC>AGC	N>S	gyrB	nonsyn
Sample_SA7	NC_000913:3907345	T>C	EX	3906853:3907578	-	AAA>AAG	K>K	phoU	syn
Sample_SA7	NC_000913:3940229	A>G	EX	3939185:3940612	-	TAT>TAC	Y>Y	hsrA	syn
Sample_SA7	NC_000913:3954568	A>G	EX	3953478:3955328	+	TAC>TGC	Y>C	ilvD	nonsyn
Sample_SA7	NC_000913:3956117	A>G	EX	3955331:3956875	+	ATC>GTC	I>V	ilvA	nonsyn
Sample_SA7	NC_000913:3968313	T>C	EX	3967916:3969019	+	CTC>CCC	L>P	wecA	nonsyn
Sample_SA7	NC_000913:3969172	A>G	EX	3969031:3970077	+	ACG>GCG	T>A	wzzE	nonsyn
Sample_SA7	NC_000913:3976969	T>C	EX	3976278:3977528	+	TTG>TCG	L>S	wzxE	nonsyn
Sample_SA7	NC_000913:4018678	A>G	EX	4017333:4018760	+	GAG>GGG	E>G	rmuC	nonsyn
Sample_SA7	NC_000913:4042912	A>G	EX	4042415:4043401	+	ATA>ATG	I>M	srkA	nonsyn
Sample_SA7	NC_000913:4086867	A>G	IG
Sample_SA7	NC_000913:4115907	A>G	EX	4115714:4117222	-	GTC>GCC	V>A	glpK	nonsyn
Sample_SA7	NC_000913:4146252	T>A	EX	4143995:4146292	+	ATC>AAC	I>N	pflD	nonsyn
Sample_SA7	NC_000913:4189430	A>G	EX	4185350:4189573	+	ACC>GCC	T>A	rpoC	nonsyn
Sample_SA7	NC_000913:4226562	A>G	EX	4223828:4227511	+	AAC>AGC	N>S	metH	nonsyn
Sample_SA7	NC_000913:4237503	A>G	EX	4236897:4237634	+	AAC>GAC	N>D	yjbG	nonsyn
Sample_SA7	NC_000913:4309134	A>G	EX	4308489:4309469	-	GGT>GGC	G>G	alsC	syn
Sample_SA7	NC_000913:4312381	A>G	EX	4312101:4312991	-	GTA>GCA	V>A	alsR	nonsyn
Sample_SA7	NC_000913:4319005	G>A	EX	4318761:4319606	-	GCC>GTC	A>V	phnJ	nonsyn
Sample_SA7	NC_000913:4321264	C>T	EX	4321244:4321696	-	GTT>ATT	V>I	phnG	nonsyn
Sample_SA7	NC_000913:4349049	A>G	IG
Sample_SA7	NC_000913:4371397	A>G	EX	4371025:4372671	+	ACC>GCC	T>A	groL	nonsyn
Sample_SA7	NC_000913:4393117	G>A	EX	4392928:4394067	-	GCC>GCT	A>A	queG	syn
Sample_SA7	NC_000913:4438939	A>G	EX	4438708:4439262	-	GGT>GGC	G>G	ytfJ	syn
Sample_SA7	NC_000913:4457831	A>G	EX	4457314:4457865	-	GTT>GCT	V>A	yjgA	nonsyn
Sample_SA7	NC_000913:4468860	A>G	EX	4467625:4470321	+	GGA>GGG	G>G	mgtA	syn
Sample_SA7	NC_000913:4480334	T>C	EX	4479730:4480926	+	GTA>GCA	V>A	yjgN	nonsyn
Sample_SA7	NC_000913:4490678	T>C	EX	4490141:4491139	-	GAA>GAG	E>E	idnR	syn
Sample_SA7	NC_000913:4501068	A>G	IG
Sample_SA7	NC_000913:4576252	A>G	IG
Sample_SA7	NC_000913:4632313	T>C	EX	4630733:4632670	+	GGT>GGC	G>G	slt	syn
Sample_SA8	NC_000913:9526	G>A	EX	9306:9893	+	GGC>GAC	G>D	mog	nonsyn
Sample_SA8	NC_000913:90708	C>T	EX	90094:91035	+	TTC>TTT	F>F	rsmH	syn
Sample_SA8	NC_000913:102142	A>G	EX	100765:102240	+	ATT>GTT	I>V	murC	nonsyn
Sample_SA8	NC_000913:112414	C>T	EX	111856:112599	-	GAG>GAA	E>E	zapD	syn
Sample_SA8	NC_000913:125671	T>C	EX	123017:125680	+	CGT>CGC	R>R	aceE	syn
Sample_SA8	NC_000913:161780	A>G	EX	161501:162031	-	CGT>CGC	R>R	ligT	syn
Sample_SA8	NC_000913:166093	T>C	EX	164730:167264	+	GTG>GCG	V>A	mrcB	nonsyn
Sample_SA8	NC_000913:184069	A>G	EX	183709:184095	-	GGT>GGC	G>G	yaeH	syn
Sample_SA8	NC_000913:186815	A>G	EX	185978:188650	-	AGT>AGC	S>S	glnD	syn
Sample_SA8	NC_000913:205607	A>G	EX	205126:208608	+	CAC>CGC	H>R	dnaE	nonsyn
Sample_SA8	NC_000913:229778	A>G	EX	229167:229970	+	GCA>GCG	A>A	dkgB	syn
Sample_SA8	NC_000913:246087	C>T	EX	245961:246239	-	CCG>CCA	P>P	yafQ	syn
Sample_SA8	NC_000913:275304	T>C	IG
Sample_SA8	NC_000913:299430	A>G	EX	298736:300934	-	GTT>GCT	V>A	paoC	nonsyn
Sample_SA8	NC_000913:330247	A>G	EX	329463:331496	+	GAG>GGG	E>G	betT	nonsyn
Sample_SA8	NC_000913:334052	T>C	EX	333501:334433	-	ACC>GCC	T>A	yahB	nonsyn
Sample_SA8	NC_000913:356314	T>C	EX	356171:357454	+	GAT>GAC	D>D	codA	syn
Sample_SA8	NC_000913:371907	T>C	EX	371239:372105	+	CGT>CGC	R>R	mhpC	syn
Sample_SA8	NC_000913:403782	A>G	EX	403703:404818	+	CAA>CGA	Q>R	yaiC	nonsyn
Sample_SA8	NC_000913:410312	C>T	EX	410144:411052	+	CGC>TGC	R>C	mak	nonsyn
Sample_SA8	NC_000913:426745	A>G	EX	426137:427264	+	GTA>GTG	V>V	tgt	syn
Sample_SA8	NC_000913:441103	A>G	EX	441101:441343	-	TAA>CAA	*>Q	xseB	nonsyn
Sample_SA8	NC_000913:452985	A>G	EX	452070:453545	-	TGT>TGC	C>C	ampG	syn
Sample_SA8	NC_000913:465653	A>G	EX	465612:467312	-	TTT>CTT	F>L	ybaE	nonsyn
Sample_SA8	NC_000913:530984	G>A	EX	530132:531226	-	GAC>GAT	D>D	mnmH	syn
Sample_SA8	NC_000913:540655	A>G	EX	540565:541866	+	ACG>GCG	T>A	ybbY	nonsyn
Sample_SA8	NC_000913:604995	A>G	EX	604771:605424	-	TAT>CAT	Y>H	nfsB	nonsyn
Sample_SA8	NC_000913:672883	A>G	EX	672201:674783	-	GTT>GCT	V>A	leuS	nonsyn
Sample_SA8	NC_000913:681289	C>T	EX	680212:681663	+	CGC>TGC	R>C	djlC	nonsyn
Sample_SA8	NC_000913:712492	T>A	EX	712038:712802	-	GAT>GTT	D>V	ybfF	nonsyn
Sample_SA8	NC_000913:754063	A>G	EX	753185:754468	-	TGT>CGT	C>R	gltA	nonsyn
Sample_SA8	NC_000913:790612	C>T	EX	789983:791029	-	GAA>AAA	E>K	galT	nonsyn
Sample_SA8	NC_000913:811649	A>G	EX	811522:812277	+	TAC>TGC	Y>C	bioC	nonsyn
Sample_SA8	NC_000913:868824	A>G	EX	867520:869391	+	CCA>CCG	P>P	gsiA	syn
Sample_SA8	NC_000913:936868	A>G	EX	933224:937213	+	GTA>GTG	V>V	ftsK	syn
Sample_SA8	NC_000913:952841	A>G	EX	951272:953554	-	GCT>GCC	A>A	pflB	syn
Sample_SA8	NC_000913:1001409	A>G	EX	999216:1001816	+	ACC>GCC	T>A	elfC	nonsyn
Sample_SA8	NC_000913:1022635	A>G	EX	1021730:1023883	-	TAT>CAT	Y>H	yccS	nonsyn
Sample_SA8	NC_000913:1029546	T>C	EX	1028779:1029969	-	AGT>GGT	S>G	rlmI	nonsyn
Sample_SA8	NC_000913:1046586	C>T	EX	1045849:1047945	-	GCC>ACC	A>T	gfcD	nonsyn
Sample_SA8	NC_000913:1125774	A>G	EX	1125562:1126146	+	AAA>AAG	K>K	rimJ	syn
Sample_SA8	NC_000913:1127068	T>C	EX	1126806:1127729	+	GTA>GCA	V>A	yceM	nonsyn
Sample_SA8	NC_000913:1127635	T>C	EX	1126806:1127729	+	GTG>GCG	V>A	yceM	nonsyn
Sample_SA8	NC_000913:1131312	A>G	EX	1131018:1131434	+	ACC>GCC	T>A	flgB	nonsyn
Sample_SA8	NC_000913:1152598	C>T	EX	1151939:1153180	+	AGC>AGT	S>S	fabF	syn
Sample_SA8	NC_000913:1186551	G>A	EX	1185844:1187070	+	TCG>TCA	S>S	pepT	syn
Sample_SA8	NC_000913:1192417	A>G	EX	1191990:1192631	-	GTG>GCG	V>A	hflD	nonsyn
Sample_SA8	NC_000913:1215759	A>G	IG
Sample_SA8	NC_000913:1240647	A>G	EX	1240335:1242071	-	GAT>GAC	D>D	cvrA	syn
Sample_SA8	NC_000913:1312031	A>G	EX	1311848:1312246	-	GAT>GAC	D>D	yciA	syn
Sample_SA8	NC_000913:1314831	C>T	EX	1314718:1315224	-	GCG>ACG	A>T	yciE	nonsyn
Sample_SA8	NC_000913:1336104	A>G	EX	1335831:1338506	+	ACC>GCC	T>A	acnA	nonsyn
Sample_SA8	NC_000913:1337737	A>G	EX	1335831:1338506	+	GAC>GGC	D>G	acnA	nonsyn
Sample_SA8	NC_000913:1345666	A>G	EX	1344757:1346742	-	GGT>GGC	G>G	gmr	syn
Sample_SA8	NC_000913:1347199	T>C	EX	1346978:1348912	-	AGC>GGC	S>G	rnb	nonsyn
Sample_SA8	NC_000913:1369964	T>C	EX	1369689:1370003	+	GGT>GGC	G>G	pspE	syn
Sample_SA8	NC_000913:1374838	C>T	EX	1374090:1374932	+	GCC>GTC	A>V	ycjP	nonsyn
Sample_SA8	NC_000913:1395862	C>T	EX	1394891:1395922	-	GCA>ACA	A>T	ynaI	nonsyn
Sample_SA8	NC_000913:1424533	T>C	EX	1423782:1425239	+	CTA>CCA	L>P	trkG	nonsyn
Sample_SA8	NC_000913:1445511	A>G	EX	1443051:1445690	+	ACC>GCC	T>A	ydbH	nonsyn
Sample_SA8	NC_000913:1459179	C>T	EX	1459054:1460481	+	ACC>ACT	T>T	paaH	syn
Sample_SA8	NC_000913:1471233	A>G	IG
Sample_SA8	NC_000913:1501111	A>G	EX	1500573:1501565	+	GAA>GGA	E>G	tehA	nonsyn
Sample_SA8	NC_000913:1507016	A>G	EX	1506781:1508742	+	GAA>GGA	E>G	ydcP	nonsyn
Sample_SA8	NC_000913:1570369	A>G	EX	1568954:1570489	-	TCA>CCA	S>P	gadC	nonsyn
Sample_SA8	NC_000913:1586879	T>C	EX	1586820:1587734	-	AAC>GAC	N>D	ydeQ	nonsyn
Sample_SA8	NC_000913:1591943	A>G	EX	1590854:1592176	-	CGT>CGC	R>R	hipA	syn
Sample_SA8	NC_000913:1641702	T>C	IG
Sample_SA8	NC_000913:1660275	T>C	EX	1658069:1660495	+	GTG>GCG	V>A	ynfE	nonsyn
Sample_SA8	NC_000913:1662337	T>C	EX	1660556:1662979	+	CGT>CGC	R>R	ynfF	syn
Sample_SA8	NC_000913:1685889	T>C	EX	1685185:1686588	-	ACT>GCT	T>A	fumC	nonsyn
Sample_SA8	NC_000913:1728581	G>A	EX	1728347:1728994	+	GGC>AGC	G>S	rnt	nonsyn
Sample_SA8	NC_000913:1730100	C>T	EX	1729087:1733703	+	GGC>GGT	G>G	lhr	syn
Sample_SA8	NC_000913:1731134	G>A	EX	1729087:1733703	+	CGC>CAC	R>H	lhr	nonsyn
Sample_SA8	NC_000913:1743142	T>C	EX	1742601:1743242	-	GAC>GGC	D>G	ribC	nonsyn
Sample_SA8	NC_000913:1757612	T>C	EX	1757421:1757657	+	CGT>CGC	R>R	lpp	syn
Sample_SA8	NC_000913:1774216	G>A	EX	1773789:1774655	+	GGG>GAG	G>E	ydiB	nonsyn
Sample_SA8	NC_000913:1782953	T>C	EX	1782681:1782974	+	GGT>GGC	G>G	ydiT	syn
Sample_SA8	NC_000913:1831289	T>C	EX	1830762:1831982	-	ACC>GCC	T>A	astC	nonsyn
Sample_SA8	NC_000913:1842453	T>C	EX	1842371:1843714	+	GTT>GCT	V>A	gdhA	nonsyn
Sample_SA8	NC_000913:1904462	G>A	EX	1903895:1904746	+	GAA>AAA	E>K	manZ	nonsyn
Sample_SA8	NC_000913:1985715	T>C	EX	1985139:1986128	-	GAA>GAG	E>E	araF	syn
Sample_SA8	NC_000913:1990020	A>G	EX	1989681:1990892	+	ACA>GCA	T>A	tyrP	nonsyn
Sample_SA8	NC_000913:2003209	T>C	EX	2002110:2003606	-	AAC>AGC	N>S	fliC	nonsyn
Sample_SA8	NC_000913:2115715	A>G	EX	2114502:2115896	-	GTG>GCG	V>A	wcaM	nonsyn
Sample_SA8	NC_000913:2120584	A>G	EX	2120160:2121554	-	GTG>GCG	V>A	wcaJ	nonsyn
Sample_SA8	NC_000913:2128562	A>G	EX	2128340:2128888	-	GGT>GGC	G>G	wcaF	syn
Sample_SA8	NC_000913:2132113	T>C	EX	2132067:2132555	-	AAC>AGC	N>S	wcaB	nonsyn
Sample_SA8	NC_000913:2137965	G>A	EX	2137902:2139485	+	GTC>ATC	V>I	yegH	nonsyn
Sample_SA8	NC_000913:2197150	T>C	IG
Sample_SA8	NC_000913:2278561	T>C	IG
Sample_SA8	NC_000913:2288526	T>C	IG
Sample_SA8	NC_000913:2373288	G>A	EX	2373272:2373538	-	GCA>GTA	A>V	pmrD	nonsyn
Sample_SA8	NC_000913:2398738	T>C	EX	2397439:2400165	-	GAA>GAG	E>E	nuoG	syn
Sample_SA8	NC_000913:2452968	A>G	IG
Sample_SA8	NC_000913:2472825	A>G	EX	2472387:2472881	-	TGT>TGC	C>C	yfdN	syn
Sample_SA8	NC_000913:2571127	T>C	EX	2570348:2571751	-	ATC>GTC	I>V	eutE	nonsyn
Sample_SA8	NC_000913:2594381	A>G	EX	2593844:2595859	-	AGT>AGC	S>S	tmcA	syn
Sample_SA8	NC_000913:2610374	T>C	EX	2610164:2610709	+	TAT>CAT	Y>H	hyfH	nonsyn
Sample_SA8	NC_000913:2628587	T>C	EX	2626695:2628938	-	ACC>GCC	T>A	yfgF	nonsyn
Sample_SA8	NC_000913:2648784	T>C	EX	2647326:2652287	-	AAA>AAG	K>K	yfhM	syn
Sample_SA8	NC_000913:2649073	G>A	EX	2647326:2652287	-	GCC>GTC	A>V	yfhM	nonsyn
Sample_SA8	NC_000913:2649414	A>G	EX	2647326:2652287	-	GGT>GGC	G>G	yfhM	syn
Sample_SA8	NC_000913:2683331	G>A	EX	2682863:2684056	+	GTG>ATG	V>M	yphH	nonsyn
Sample_SA8	NC_000913:2724094	T>C	IG
Sample_SA8	NC_000913:2762761	G>A	EX	2761351:2763540	-	CTC>CTT	L>L	yfjK	syn
Sample_SA8	NC_000913:2776420	T>C	EX	2776386:2776868	+	GTA>GCA	V>A	yfjY	nonsyn
Sample_SA8	NC_000913:2784352	A>G	IG
Sample_SA8	NC_000913:2788826	A>G	IG
Sample_SA8	NC_000913:2820243	T>C	EX	2819381:2822011	-	AAC>AGC	N>S	alaS	nonsyn
Sample_SA8	NC_000913:2840993	T>C	EX	2840990:2842414	+	TCA>CCA	S>P	ascB	nonsyn
Sample_SA8	NC_000913:2861781	T>C	EX	2861430:2862338	+	TTC>CTC	F>L	ygbJ	nonsyn
Sample_SA8	NC_000913:2881578	T>C	EX	2881051:2882142	-	ACT>GCT	T>A	casC	nonsyn
Sample_SA8	NC_000913:2888355	T>C	IG
Sample_SA8	NC_000913:2924299	T>C	IG
Sample_SA8	NC_000913:2929223	T>C	EX	2928229:2929518	+	GTG>GCG	V>A	sdaC	nonsyn
Sample_SA8	NC_000913:2965268	A>G	EX	2965162:2966037	-	GTG>GCG	V>A	lgt	nonsyn
Sample_SA8	NC_000913:2974164	G>A	EX	2973855:2976014	-	GCC>GCT	A>A	aas	syn
Sample_SA8	NC_000913:3000815	T>C	EX	3000345:3002603	+	GGT>GGC	G>G	xdhA	syn
Sample_SA8	NC_000913:3014797	A>G	EX	3014287:3015057	-	TGT>TGC	C>C	yqeC	syn
Sample_SA8	NC_000913:3037294	T>C	EX	3036373:3038106	-	GCA>GCG	A>A	recJ	syn
Sample_SA8	NC_000913:3051158	C>T	EX	3051115:3052317	-	CGC>CAC	R>H	ubiI	nonsyn
Sample_SA8	NC_000913:3061081	T>C	EX	3060850:3062994	+	TAT>CAT	Y>H	scpA	nonsyn
Sample_SA8	NC_000913:3066283	A>G	EX	3066277:3067173	-	AGT>AGC	S>S	ygfI	syn
Sample_SA8	NC_000913:3081379	T>C	EX	3079644:3081635	-	GAA>GGA	E>G	tktA	nonsyn
Sample_SA8	NC_000913:3092073	T>C	EX	3091878:3092828	+	TGG>CGG	W>R	gshB	nonsyn
Sample_SA8	NC_000913:3111990	G>A	IG
Sample_SA8	NC_000913:3142226	T>C	EX	3141286:3142989	-	GAG>GGG	E>G	hybC	nonsyn
Sample_SA8	NC_000913:3163710	G>A	IG
Sample_SA8	NC_000913:3171900	T>C	EX	3171879:3172211	-	GGA>GGG	G>G	ygiZ	syn
Sample_SA8	NC_000913:3173183	A>G	EX	3173142:3173456	+	CAA>CAG	Q>Q	ygiN	syn
Sample_SA8	NC_000913:3181424	T>C	EX	3180421:3181581	+	GTT>GCT	V>A	ygiC	nonsyn
Sample_SA8	NC_000913:3202477	T>C	EX	3201891:3203129	+	GTA>GCA	V>A	cca	nonsyn
Sample_SA8	NC_000913:3206859	T>C	EX	3206463:3207374	+	TGG>CGG	W>R	ttdA	nonsyn
Sample_SA8	NC_000913:3223611	T>C	EX	3222633:3225725	+	TTC>CTC	F>L	ebgA	nonsyn
Sample_SA8	NC_000913:3257153	T>C	EX	3256679:3258010	-	GGA>GGG	G>G	yhaO	syn
Sample_SA8	NC_000913:3278642	A>G	EX	3277856:3278665	-	GGT>GGC	G>G	agaR	syn
Sample_SA8	NC_000913:3310178	T>C	EX	3309033:3311168	-	ACT>GCT	T>A	pnp	nonsyn
Sample_SA8	NC_000913:3332634	T>C	EX	3331770:3332735	-	GAA>GAG	E>E	yhbE	syn
Sample_SA8	NC_000913:3396717	A>G	EX	3396326:3397795	-	GTG>GCG	V>A	rng	nonsyn
Sample_SA8	NC_000913:3466230	T>C	IG
Sample_SA8	NC_000913:3488061	T>C	EX	3486791:3488893	+	GTC>GCC	V>A	yhfK	nonsyn
Sample_SA8	NC_000913:3503342	A>G	EX	3503167:3503952	+	GAT>GGT	D>G	frlD	nonsyn
Sample_SA8	NC_000913:3520663	G>A	EX	3520615:3521019	-	ACC>ACT	T>T	hofP	syn
Sample_SA8	NC_000913:3523130	A>G	EX	3522871:3525423	+	GAC>GGC	D>G	mrcA	nonsyn
Sample_SA8	NC_000913:3558716	G>A	EX	3558268:3559866	+	GGC>GAC	G>D	rtcR	nonsyn
Sample_SA8	NC_000913:3560367	G>A	IG
Sample_SA8	NC_000913:3571165	T>C	EX	3569346:3571319	-	CAC>CGC	H>R	glgX	nonsyn
Sample_SA8	NC_000913:3596782	G>A	EX	3596451:3597560	-	GCC>GTC	A>V	livK	nonsyn
Sample_SA8	NC_000913:3655209	T>C	EX	3654683:3655213	+	GTG>GCG	V>A	dctR	nonsyn
Sample_SA8	NC_000913:3676185	T>C	IG
Sample_SA8	NC_000913:3791649	A>G	EX	3791355:3792551	-	CGT>CGC	R>R	kbl	syn
Sample_SA8	NC_000913:3809708	A>G	EX	3808540:3809817	+	TAC>TGC	Y>C	waaA	nonsyn
Sample_SA8	NC_000913:3822528	A>G	EX	3822400:3824508	+	GAA>GAG	E>E	spoT	syn
Sample_SA8	NC_000913:3868755	C>T	EX	3868062:3869309	-	CAG>CAA	Q>Q	yidR	syn
Sample_SA8	NC_000913:3890872	C>T	EX	3890236:3891483	+	CCC>TCC	P>S	tnaB	nonsyn
Sample_SA8	NC_000913:3894878	T>C	EX	3894652:3895218	+	GTG>GCG	V>A	chrR	nonsyn
Sample_SA8	NC_000913:3903032	T>C	EX	3902289:3903701	-	AAT>GAT	N>D	bglB	nonsyn
Sample_SA8	NC_000913:3914693	T>C	EX	3913830:3915200	-	ACC>GCC	T>A	glmU	nonsyn
Sample_SA8	NC_000913:3916051	T>C	EX	3915993:3917375	-	CAG>CGG	Q>R	atpD	nonsyn
Sample_SA8	NC_000913:3931813	T>C	EX	3931316:3933184	+	GGT>GGC	G>G	kup	syn
Sample_SA8	NC_000913:4022986	C>T	EX	4022736:4023512	+	GCG>GTG	A>V	tatC	nonsyn
Sample_SA8	NC_000913:4031813	T>C	EX	4031161:4032492	+	GTG>GCG	V>A	pepQ	nonsyn
Sample_SA8	NC_000913:4060298	A>G	IG
Sample_SA8	NC_000913:4064256	T>C	EX	4063603:4064295	-	ACC>GCC	T>A	ompL	nonsyn
Sample_SA8	NC_000913:4127860	A>C	EX	4127286:4127894	-	GTT>GGT	V>G	yiiX	nonsyn
Sample_SA8	NC_000913:4274511	T>C	EX	4274125:4274661	+	GGT>GGC	G>G	ssb	syn
Sample_SA8	NC_000913:4314322	C>T	IG
Sample_SA8	NC_000913:4401572	G>A	EX	4400672:4401952	+	GTT>ATT	V>I	hflX	nonsyn
Sample_SA8	NC_000913:4452948	C>T	EX	4452571:4453596	+	GGC>GGT	G>G	ytfT	syn
Sample_SA8	NC_000913:4462934	A>G	IG
Sample_SA8	NC_000913:4497778	C>T	IG
Sample_SA8	NC_000913:4539345	A>G	EX	4538785:4539501	-	TGG>CGG	W>R	nanC	nonsyn
Sample_SA9	NC_000913:32660	G>A	EX	30817:34038	+	CGC>CAC	R>H	carB	nonsyn
Sample_SA9	NC_000913:54956	A>G	EX	54755:57109	-	GGT>GGC	G>G	lptD	syn
Sample_SA9	NC_000913:82537	A>G	EX	81958:83529	-	CGT>CGC	R>R	leuA	syn
Sample_SA9	NC_000913:137837	G>A	EX	137083:138633	+	CGC>CAC	R>H	cueO	nonsyn
Sample_SA9	NC_000913:139084	C>T	EX	138835:141225	-	GGG>GGA	G>G	gcd	syn
Sample_SA9	NC_000913:151687	A>G	EX	151626:152231	-	GTA>GCA	V>A	yadL	nonsyn
Sample_SA9	NC_000913:160514	A>G	EX	160149:160604	-	TAT>CAT	Y>H	dksA	nonsyn
Sample_SA9	NC_000913:167130	C>T	EX	164730:167264	+	CAG>TAG	Q>*	mrcB	nonsyn
Sample_SA9	NC_000913:206480	C>T	EX	205126:208608	+	CCG>CTG	P>L	dnaE	nonsyn
Sample_SA9	NC_000913:246161	T>C	EX	245961:246239	-	AAT>GAT	N>D	yafQ	nonsyn
Sample_SA9	NC_000913:258895	G>A	IG
Sample_SA9	NC_000913:273343	A>G	IG
Sample_SA9	NC_000913:296220	C>T	EX	295696:297096	-	GCA>ACA	A>T	intF	nonsyn
Sample_SA9	NC_000913:298426	C>T	EX	297770:298726	-	GGC>AGC	G>S	paoD	nonsyn
Sample_SA9	NC_000913:322139	T>C	EX	321608:322327	+	TTC>CTC	F>L	ykgE	nonsyn
Sample_SA9	NC_000913:334718	A>G	EX	334525:335022	-	GTG>GCG	V>A	yahC	nonsyn
Sample_SA9	NC_000913:342478	C>T	EX	341125:342507	+	CAA>TAA	Q>*	yahJ	nonsyn
Sample_SA9	NC_000913:350284	T>C	EX	350012:351181	+	GCT>GCC	A>A	prpC	syn
Sample_SA9	NC_000913:354225	C>T	EX	352706:354592	+	ACG>ATG	T>M	prpE	nonsyn
Sample_SA9	NC_000913:358614	T>C	EX	357791:358690	-	CAC>CGC	H>R	cynR	nonsyn
Sample_SA9	NC_000913:385637	A>G	EX	385232:386194	+	AGC>GGC	S>G	tauA	nonsyn
Sample_SA9	NC_000913:441030	T>C	EX	440202:441101	-	CCA>CCG	P>P	ispA	syn
Sample_SA9	NC_000913:460930	T>C	EX	458888:461242	+	GGT>GGC	G>G	lon	syn
Sample_SA9	NC_000913:461569	A>G	EX	461451:461723	+	GAT>GGT	D>G	hupB	nonsyn
Sample_SA9	NC_000913:518580	A>G	EX	518340:519149	-	GGT>GGC	G>G	ybbO	syn
Sample_SA9	NC_000913:560054	C>T	EX	559697:562300	+	CCC>TCC	P>S	sfmD	nonsyn
Sample_SA9	NC_000913:566170	C>T	IG
Sample_SA9	NC_000913:596583	C>T	EX	595600:596973	+	AGC>AGT	S>S	cusC	syn
Sample_SA9	NC_000913:746509	C>T	EX	745935:746726	+	GCG>GTG	A>V	nei	nonsyn
Sample_SA9	NC_000913:800290	T>C	EX	799622:800575	-	ACG>GCG	T>A	ybhD	nonsyn
Sample_SA9	NC_000913:854096	A>G	EX	853647:854765	+	GGA>GGG	G>G	ybiR	syn
Sample_SA9	NC_000913:877486	C>T	EX	876710:878035	-	GCG>ACG	A>T	rimO	nonsyn
Sample_SA9	NC_000913:933879	A>G	EX	933224:937213	+	GAC>GGC	D>G	ftsK	nonsyn
Sample_SA9	NC_000913:946614	T>C	EX	945871:947019	+	GGT>GGC	G>G	ycaD	syn
Sample_SA9	NC_000913:955941	A>G	EX	954872:956632	-	GTT>GCT	V>A	ycaO	nonsyn
Sample_SA9	NC_000913:969693	A>G	EX	969389:970621	+	CAC>CGC	H>R	ycaQ	nonsyn
Sample_SA9	NC_000913:983995	A>G	EX	983650:984297	+	ACC>GCC	T>A	ycbL	nonsyn
Sample_SA9	NC_000913:992049	A>G	EX	990622:993234	+	GCA>GCG	A>A	pepN	syn
Sample_SA9	NC_000913:1022227	A>G	EX	1021730:1023883	-	TAT>CAT	Y>H	yccS	nonsyn
Sample_SA9	NC_000913:1084165	A>G	EX	1083376:1084647	+	ACA>GCA	T>A	efeB	nonsyn
Sample_SA9	NC_000913:1097904	C>T	EX	1097886:1098824	+	CAC>TAC	H>Y	ghrA	nonsyn
Sample_SA9	NC_000913:1116002	A>G	EX	1115662:1116582	-	GTG>GCG	V>A	lpxL	nonsyn
Sample_SA9	NC_000913:1125197	C>T	EX	1124118:1125326	-	GCC>ACC	A>T	mdtH	nonsyn
Sample_SA9	NC_000913:1136959	A>G	EX	1136274:1137371	+	AAC>AGC	N>S	flgI	nonsyn
Sample_SA9	NC_000913:1142917	T>C	EX	1141182:1144367	-	TAC>TGC	Y>C	rne	nonsyn
Sample_SA9	NC_000913:1167623	A>G	EX	1167599:1168138	+	ATC>GTC	I>V	ycfJ	nonsyn
Sample_SA9	NC_000913:1184007	A>G	EX	1183617:1184444	-	GGT>GGC	G>G	potB	syn
Sample_SA9	NC_000913:1187852	T>C	EX	1187119:1188240	-	GAC>GGC	D>G	roxA	nonsyn
Sample_SA9	NC_000913:1238175	T>C	EX	1237571:1238869	+	CTA>CCA	L>P	dadA	nonsyn
Sample_SA9	NC_000913:1282139	A>G	EX	1279864:1283607	+	GAC>GGC	D>G	narG	nonsyn
Sample_SA9	NC_000913:1355054	A>G	EX	1354505:1355470	-	GGT>GGC	G>G	sapB	syn
Sample_SA9	NC_000913:1406071	T>C	EX	1405979:1406542	+	CGT>CGC	R>R	smrA	syn
Sample_SA9	NC_000913:1427133	T>C	IG
Sample_SA9	NC_000913:1430678	G>A	EX	1429049:1432411	+	GCA>ACA	A>T	stfR	nonsyn
Sample_SA9	NC_000913:1438893	A>G	EX	1437260:1440784	-	GTT>GCT	V>A	pfo	nonsyn
Sample_SA9	NC_000913:1474559	T>C	EX	1474221:1475081	+	CGT>CGC	R>R	ydbC	syn
Sample_SA9	NC_000913:1495972	A>G	EX	1495288:1496631	+	ACG>GCG	T>A	ydcJ	nonsyn
Sample_SA9	NC_000913:1657186	A>G	EX	1656747:1657457	-	GTA>GCA	V>A	ynfC	nonsyn
Sample_SA9	NC_000913:1796694	G>A	EX	1795557:1797944	-	ATC>ATT	I>I	pheT	syn
Sample_SA9	NC_000913:1827123	C>T	EX	1826916:1828259	-	GCG>GCA	A>A	astB	syn
Sample_SA9	NC_000913:1850529	T>C	EX	1848837:1850693	+	TCT>CCT	S>P	sppA	nonsyn
Sample_SA9	NC_000913:1885300	T>C	EX	1884665:1885789	+	TGT>TGC	C>C	yeaW	syn
Sample_SA9	NC_000913:1895953	A>G	EX	1894805:1896166	+	GAA>GAG	E>E	pabB	syn
Sample_SA9	NC_000913:1899401	A>G	EX	1898427:1900025	+	GAA>GAG	E>E	yoaD	syn
Sample_SA9	NC_000913:1922069	T>C	IG
Sample_SA9	NC_000913:1943389	T>C	EX	1942662:1943417	+	GTT>GCT	V>A	znuC	nonsyn
Sample_SA9	NC_000913:1944114	T>C	EX	1943414:1944199	+	GTT>GCT	V>A	znuB	nonsyn
Sample_SA9	NC_000913:2032281	T>C	EX	2030899:2032317	-	ACC>GCC	T>A	dcm	nonsyn
Sample_SA9	NC_000913:2051290	A>G	EX	2044938:2052014	+	TAC>TGC	Y>C	yeeJ	nonsyn
Sample_SA9	NC_000913:2110387	T>C	EX	2110138:2111019	-	GGA>GGG	G>G	rfbA	syn
Sample_SA9	NC_000913:2126241	T>C	EX	2126225:2127190	-	GAC>GGC	D>G	wcaG	nonsyn
Sample_SA9	NC_000913:2140464	T>C	EX	2139759:2141612	-	GGA>GGG	G>G	asmA	syn
Sample_SA9	NC_000913:2148279	A>G	EX	2147674:2149026	+	GAA>GAG	E>E	yegD	syn
Sample_SA9	NC_000913:2183877	T>C	EX	2183716:2184516	-	ACA>GCA	T>A	thiD	nonsyn
Sample_SA9	NC_000913:2200848	A>G	EX	2200279:2203911	+	CTA>CTG	L>L	yehI	syn
Sample_SA9	NC_000913:2238729	A>G	EX	2237769:2239289	-	CAT>CAC	H>H	mglA	syn
Sample_SA9	NC_000913:2253315	G>A	EX	2252895:2254145	-	AAC>AAT	N>N	nupX	syn
Sample_SA9	NC_000913:2257757	T>C	EX	2257429:2258367	-	GAC>GGC	D>G	psuG	nonsyn
Sample_SA9	NC_000913:2323612	T>C	EX	2323447:2324109	+	TTT>CTT	F>L	atoD	nonsyn
Sample_SA9	NC_000913:2384128	T>C	EX	2383995:2385722	-	TAC>TGC	Y>C	yfbK	nonsyn
Sample_SA9	NC_000913:2387834	T>C	EX	2387710:2388426	-	GAC>GGC	D>G	yfbN	nonsyn
Sample_SA9	NC_000913:2407564	T>C	EX	2407561:2408778	+	TCC>CCC	S>P	alaA	nonsyn
Sample_SA9	NC_000913:2413003	T>C	EX	2412677:2413132	-	ACG>GCG	T>A	yfbV	nonsyn
Sample_SA9	NC_000913:2433761	T>C	EX	2433012:2433926	-	ACA>GCA	T>A	accD	nonsyn
Sample_SA9	NC_000913:2488488	T>C	EX	2488023:2489168	-	CAA>CAG	Q>Q	yfdE	syn
Sample_SA9	NC_000913:2531452	T>C	IG
Sample_SA9	NC_000913:2572864	A>G	EX	2572489:2573505	-	TGT>TGC	C>C	eutD	syn
Sample_SA9	NC_000913:2575540	G>A	EX	2575470:2575805	-	GCG>GTG	A>V	eutS	nonsyn
Sample_SA9	NC_000913:2577997	T>C	EX	2576098:2578377	-	GAA>GAG	E>E	maeB	syn
Sample_SA9	NC_000913:2584558	A>G	EX	2583546:2585525	-	GTC>GCC	V>A	aegA	nonsyn
Sample_SA9	NC_000913:2595370	T>C	EX	2593844:2595859	-	ACT>GCT	T>A	tmcA	nonsyn
Sample_SA9	NC_000913:2624639	T>C	EX	2623044:2625110	+	GGT>GGC	G>G	ppk	syn
Sample_SA9	NC_000913:2652847	T>C	EX	2652494:2653339	+	ATT>ATC	I>I	sseA	syn
Sample_SA9	NC_000913:2797316	T>C	EX	2797211:2797510	+	TCC>CCC	S>P	ygaV	nonsyn
Sample_SA9	NC_000913:2817339	A>G	EX	2816937:2817503	-	GCT>GCC	A>A	yqaB	syn
Sample_SA9	NC_000913:2837744	A>G	EX	2837578:2838105	-	GTA>GCA	V>A	hydN	nonsyn
Sample_SA9	NC_000913:2841256	T>C	EX	2840990:2842414	+	CGT>CGC	R>R	ascB	syn
Sample_SA9	NC_000913:2903414	A>G	IG
Sample_SA9	NC_000913:2910099	T>C	EX	2909894:2910685	-	GAC>GGC	D>G	mazG	nonsyn
Sample_SA9	NC_000913:2926730	G>A	EX	2926308:2927672	+	GCG>GCA	A>A	ygdH	syn
Sample_SA9	NC_000913:2957029	G>A	EX	2955996:2958884	-	GCA>GTA	A>V	ptrA	nonsyn
Sample_SA9	NC_000913:2999749	T>C	EX	2999136:2999891	-	GAT>GGT	D>G	ygeR	nonsyn
Sample_SA9	NC_000913:3010690	C>T	EX	3010028:3011413	+	GCC>GCT	A>A	hyuA	syn
Sample_SA9	NC_000913:3049029	A>G	EX	3046168:3049041	-	TTA>CTA	L>L	gcvP	syn
Sample_SA9	NC_000913:3092021	T>C	EX	3091878:3092828	+	GGT>GGC	G>G	gshB	syn
Sample_SA9	NC_000913:3109177	A>G	IG
Sample_SA9	NC_000913:3145012	G>A	EX	3144154:3145140	-	GAC>GAT	D>D	hybA	syn
Sample_SA9	NC_000913:3189510	T>C	IG
Sample_SA9	NC_000913:3274373	G>A	EX	3273573:3274907	-	CAC>TAC	H>Y	garP	nonsyn
Sample_SA9	NC_000913:3295420	T>C	EX	3295394:3295789	+	GGT>GGC	G>G	yraN	syn
Sample_SA9	NC_000913:3317202	T>C	EX	3316039:3317526	-	ACG>GCG	T>A	nusA	nonsyn
Sample_SA9	NC_000913:3320012	G>T	EX	3319988:3321613	-	AAC>AAA	N>K	yhbX	nonsyn
Sample_SA9	NC_000913:3347929	T>C	EX	3347115:3347969	+	GTC>GCC	V>A	yhbJ	nonsyn
Sample_SA9	NC_000913:3358578	G>A	EX	3354725:3359185	+	GGC>GAC	G>D	gltB	nonsyn
Sample_SA9	NC_000913:3439431	T>C	EX	3439141:3439509	-	AGC>GGC	S>G	yhdN	nonsyn
Sample_SA9	NC_000913:3502280	T>C	EX	3501268:3502290	+	GTG>GCG	V>A	frlB	nonsyn
Sample_SA9	NC_000913:3551783	G>A	EX	3550080:3552473	-	CTG>TTG	L>L	malP	syn
Sample_SA9	NC_000913:3557064	G>A	EX	3556853:3558079	-	GCC>GTC	A>V	rtcB	nonsyn
Sample_SA9	NC_000913:3569565	T>C	EX	3569346:3571319	-	CAA>CAG	Q>Q	glgX	syn
Sample_SA9	NC_000913:3586848	C>T	IG
Sample_SA9	NC_000913:3590908	A>G	EX	3590024:3590911	-	TCA>CCA	S>P	ugpA	nonsyn
Sample_SA9	NC_000913:3609136	A>G	IG
Sample_SA9	NC_000913:3654436	A>G	EX	3653961:3654527	+	TAC>TGC	Y>C	slp	nonsyn
Sample_SA9	NC_000913:3670702	G>A	EX	3669592:3671241	+	GAG>AAG	E>K	treF	nonsyn
Sample_SA9	NC_000913:3705817	A>G	IG
Sample_SA9	NC_000913:3740542	G>A	EX	3739705:3740958	+	GCA>ACA	A>T	avtA	nonsyn
Sample_SA9	NC_000913:3756528	T>C	IG
Sample_SA9	NC_000913:3787803	T>C	EX	3786838:3788097	+	GGT>GGC	G>G	envC	syn
Sample_SA9	NC_000913:3799838	T>C	EX	3799345:3800196	-	TAC>TGC	Y>C	waaZ	nonsyn
Sample_SA9	NC_000913:3849571	T>C	EX	3848634:3850136	-	TAC>TGC	Y>C	uhpB	nonsyn
Sample_SA9	NC_000913:4049254	T>C	EX	4046966:4049752	+	GGT>GGC	G>G	polA	syn
Sample_SA9	NC_000913:4049337	A>G	EX	4046966:4049752	+	TAC>TGC	Y>C	polA	nonsyn
Sample_SA9	NC_000913:4103769	A>G	EX	4103602:4104975	-	TTC>CTC	F>L	cpxA	nonsyn
Sample_SA9	NC_000913:4141396	T>G	EX	4139720:4142221	-	ACC>CCC	T>P	frwA	nonsyn
Sample_SA9	NC_000913:4166091	A>G	EX	4165428:4166285	+	ACC>GCC	T>A	murI	nonsyn
Sample_SA9	NC_000913:4184246	G>A	EX	4181245:4185273	+	GGC>GAC	G>D	rpoB	nonsyn
Sample_SA9	NC_000913:4185573	A>G	EX	4185350:4189573	+	TAC>TGC	Y>C	rpoC	nonsyn
Sample_SA9	NC_000913:4294599	T>C	EX	4294481:4295794	+	TTG>TCG	L>S	gltP	nonsyn
Sample_SA9	NC_000913:4344342	T>C	EX	4343369:4344790	+	GTC>GCC	V>A	melB	nonsyn
Sample_SA9	NC_000913:4355391	C>T	EX	4354954:4356411	-	GTC>ATC	V>I	dtpC	nonsyn
Sample_SA9	NC_000913:4365954	T>C	EX	4365472:4366773	-	ACC>GCC	T>A	dcuA	nonsyn
Sample_SA9	NC_000913:4385819	A>G	EX	4385704:4386018	+	AAC>AGC	N>S	yjeO	nonsyn
Sample_SA9	NC_000913:4386596	A>G	EX	4386047:4389370	-	GGT>GGC	G>G	mscM	syn
Sample_SA9	NC_000913:4424780	A>G	EX	4424516:4424791	-	CGT>CGC	R>R	yjfY	syn
Sample_SA9	NC_000913:4427970	A>G	IG
Sample_SA9	NC_000913:4440172	A>G	EX	4439872:4441215	-	CGT>CGC	R>R	ytfL	syn
Sample_SA9	NC_000913:4466654	T>C	EX	4466299:4467246	-	TAC>TGC	Y>C	treR	nonsyn
Sample_SA9	NC_000913:4480105	A>G	EX	4479730:4480926	+	ACC>GCC	T>A	yjgN	nonsyn
Sample_SA9	NC_000913:4486044	T>C	IG
Sample_SA9	NC_000913:4502568	C>T	EX	4502103:4503431	-	CTG>CTA	L>L	insG	syn
Sample_SA9	NC_000913:4524771	A>G	EX	4524105:4525010	-	GGT>GGC	G>G	yjhH	syn
Sample_SA9	NC_000913:4531902	T>C	IG
Sample_SA9	NC_000913:4532941	T>C	EX	4532437:4533183	-	GAA>GAG	E>E	yjhP	syn
Sample_SA9	NC_000913:4604165	A>G	EX	4604160:4604837	+	GAA>GAG	E>E	bglJ	syn
Sample_SA9	NC_000913:4624355	T>C	EX	4624145:4624789	-	ACA>ACG	T>T	ytjB	syn
Sample_SA10	NC_000913:676	T>C	IG
Sample_SA10	NC_000913:6360	A>G	EX	5683:6459	-	TTG>CTG	L>L	yaaA	syn
Sample_SA10	NC_000913:51677	T>C	EX	51609:52430	-	ATC>GTC	I>V	rsmA	nonsyn
Sample_SA10	NC_000913:62339	A>G	EX	60358:63264	-	GTT>GCT	V>A	rapA	nonsyn
Sample_SA10	NC_000913:90467	A>G	EX	90094:91035	+	GAC>GGC	D>G	rsmH	nonsyn
Sample_SA10	NC_000913:100667	A>G	EX	99644:100711	+	ACC>GCC	T>A	murG	nonsyn
Sample_SA10	NC_000913:104554	A>G	EX	103982:105244	+	GCA>GCG	A>A	ftsA	syn
Sample_SA10	NC_000913:106560	A>T	EX	106557:107474	+	ATC>TTC	I>F	lpxC	nonsyn
Sample_SA10	NC_000913:127145	A>G	EX	125695:127587	+	GAC>GGC	D>G	aceF	nonsyn
Sample_SA10	NC_000913:145258	G>A	EX	145081:146310	+	GCC>ACC	A>T	yadE	nonsyn
Sample_SA10	NC_000913:159495	T>C	EX	159186:160112	-	GAA>GAG	E>E	gluQ	syn
Sample_SA10	NC_000913:205340	T>C	EX	205126:208608	+	GTC>GCC	V>A	dnaE	nonsyn
Sample_SA10	NC_000913:242657	T>C	EX	240859:243303	-	TAC>TGC	Y>C	fadE	nonsyn
Sample_SA10	NC_000913:256253	A>G	EX	255977:256435	+	ACC>GCC	T>A	gpt	nonsyn
Sample_SA10	NC_000913:257633	C>T	EX	256527:257771	+	AGC>AGT	S>S	frsA	syn
Sample_SA10	NC_000913:264377	G>A	EX	264256:264732	-	GCC>GTC	A>V	ykfG	nonsyn
Sample_SA10	NC_000913:273186	G>A	IG
Sample_SA10	NC_000913:273607	A>G	IG
Sample_SA10	NC_000913:289546	A>G	EX	289301:290305	-	TAT>CAT	Y>H	argF	nonsyn
Sample_SA10	NC_000913:329605	A>G	EX	329463:331496	+	GAC>GGC	D>G	betT	nonsyn
Sample_SA10	NC_000913:334113	C>T	EX	333501:334433	-	ACG>ACA	T>T	yahB	syn
Sample_SA10	NC_000913:337708	C>T	EX	336778:338325	+	CTC>TTC	L>F	yahF	nonsyn
Sample_SA10	NC_000913:342738	A>G	IG
Sample_SA10	NC_000913:349416	C>T	EX	348682:349572	+	CGC>CGT	R>R	prpB	syn
Sample_SA10	NC_000913:351317	G>A	EX	351215:352666	+	GAC>AAC	D>N	prpD	nonsyn
Sample_SA10	NC_000913:369715	A>G	EX	368611:370275	+	ACG>GCG	T>A	mhpA	nonsyn
Sample_SA10	NC_000913:377239	G>A	EX	376772:377311	+	GCG>GCA	A>A	yaiL	syn
Sample_SA10	NC_000913:379970	A>G	IG
Sample_SA10	NC_000913:419313	T>C	IG
Sample_SA10	NC_000913:472162	C>T	EX	470636:472417	+	TCC>TCT	S>S	mdlB	syn
Sample_SA10	NC_000913:500404	A>G	EX	500125:501429	+	ACC>GCC	T>A	gsk	nonsyn
Sample_SA10	NC_000913:518710	A>G	EX	518340:519149	-	GTG>GCG	V>A	ybbO	nonsyn
Sample_SA10	NC_000913:528173	A>G	IG
Sample_SA10	NC_000913:649753	C>T	EX	649582:650490	-	CCG>CCA	P>P	citE	syn
Sample_SA10	NC_000913:652567	T>C	EX	652235:653893	+	CCT>CCC	P>P	citA	syn
Sample_SA10	NC_000913:719489	T>C	EX	718262:720460	-	GAA>GAG	E>E	speF	syn
Sample_SA10	NC_000913:731968	A>G	EX	729583:733776	+	ACC>GCC	T>A	rhsC	nonsyn
Sample_SA10	NC_000913:747946	A>G	EX	747921:748982	-	GTG>GCG	V>A	ybgO	nonsyn
Sample_SA10	NC_000913:791962	T>C	EX	791039:792055	-	AAC>GAC	N>D	galE	nonsyn
Sample_SA10	NC_000913:916374	A>G	IG
Sample_SA10	NC_000913:972999	T>C	EX	972622:973401	-	ACG>GCG	T>A	ycbC	nonsyn
Sample_SA10	NC_000913:1031754	C>T	IG
Sample_SA10	NC_000913:1033013	A>G	EX	1032139:1033257	+	CAC>CGC	H>R	hyaA	nonsyn
Sample_SA10	NC_000913:1043360	T>C	EX	1042030:1044210	-	GAC>GGC	D>G	etk	nonsyn
Sample_SA10	NC_000913:1052491	G>A	EX	1052289:1053362	-	GCC>GTC	A>V	yccM	nonsyn
Sample_SA10	NC_000913:1068618	A>G	EX	1068511:1069839	-	TTG>CTG	L>L	rutG	syn
Sample_SA10	NC_000913:1075051	T>C	EX	1074920:1078882	-	ACA>GCA	T>A	putA	nonsyn
Sample_SA10	NC_000913:1119453	A>G	IG
Sample_SA10	NC_000913:1120397	C>T	EX	1119468:1120586	-	GTC>ATC	V>I	solA	nonsyn
Sample_SA10	NC_000913:1149979	A>G	EX	1149728:1150657	+	GCA>GCG	A>A	fabD	syn
Sample_SA10	NC_000913:1158934	C>G	EX	1157869:1159302	+	CTG>GTG	L>V	ptsG	nonsyn
Sample_SA10	NC_000913:1174650	T>C	EX	1174092:1175165	-	GTA>GTG	V>V	ycfT	syn
Sample_SA10	NC_000913:1205199	A>G	IG
Sample_SA10	NC_000913:1217858	A>G	EX	1217328:1218851	+	GGA>GGG	G>G	ycgG	syn
Sample_SA10	NC_000913:1233145	A>G	IG
Sample_SA10	NC_000913:1236218	A>G	EX	1235709:1237241	-	TTC>CTC	F>L	ycgB	nonsyn
Sample_SA10	NC_000913:1295601	A>G	EX	1295446:1298121	-	TGC>CGC	C>R	adhE	nonsyn
Sample_SA10	NC_000913:1297091	T>C	EX	1295446:1298121	-	TAC>TGC	Y>C	adhE	nonsyn
Sample_SA10	NC_000913:1360594	A>G	EX	1359490:1360908	-	GGT>GGC	G>G	puuA	syn
Sample_SA10	NC_000913:1407566	A>G	EX	1406563:1407795	-	GTT>GCT	V>A	ydaM	nonsyn
Sample_SA10	NC_000913:1417104	G>A	EX	1414786:1417386	-	CCA>TCA	P>S	recE	nonsyn
Sample_SA10	NC_000913:1426438	T>C	IG
Sample_SA10	NC_000913:1426443	A>G	IG
Sample_SA10	NC_000913:1443710	G>A	EX	1443051:1445690	+	CCG>CCA	P>P	ydbH	syn
Sample_SA10	NC_000913:1448018	T>C	EX	1447519:1449018	+	GTG>GCG	V>A	feaB	nonsyn
Sample_SA10	NC_000913:1450676	A>G	EX	1449076:1451349	-	GTG>GCG	V>A	tynA	nonsyn
Sample_SA10	NC_000913:1467051	A>G	IG
Sample_SA10	NC_000913:1473815	T>C	IG
Sample_SA10	NC_000913:1485616	G>A	EX	1483061:1486963	+	TGG>TGA	W>*	hrpA	nonsyn
Sample_SA10	NC_000913:1565354	A>G	EX	1563334:1565733	-	GTA>GCA	V>A	dosP	nonsyn
Sample_SA10	NC_000913:1592254	C>T	EX	1592176:1592442	-	TCG>TCA	S>S	hipB	syn
Sample_SA10	NC_000913:1595866	A>G	IG
Sample_SA10	NC_000913:1602065	T>C	EX	1601490:1603025	+	GGT>GGC	G>G	lsrA	syn
Sample_SA10	NC_000913:1605537	A>G	EX	1605051:1606073	+	ACC>GCC	T>A	lsrB	nonsyn
Sample_SA10	NC_000913:1648720	C>T	EX	1648665:1648793	+	GCC>GTC	A>V	ydfB	nonsyn
Sample_SA10	NC_000913:1676558	A>G	EX	1676371:1677903	-	CTG>CCG	L>P	pntA	nonsyn
Sample_SA10	NC_000913:1699944	T>C	EX	1699355:1700947	+	GTG>GCG	V>A	malX	nonsyn
Sample_SA10	NC_000913:1709449	T>C	EX	1709142:1710200	+	GTG>GCG	V>A	rsxD	nonsyn
Sample_SA10	NC_000913:1730533	T>C	EX	1729087:1733703	+	TAC>CAC	Y>H	lhr	nonsyn
Sample_SA10	NC_000913:1751500	T>C	EX	1751077:1751724	-	GAA>GAG	E>E	ydhW	syn
Sample_SA10	NC_000913:1756334	G>A	EX	1755698:1757110	+	GAA>AAA	E>K	pykF	nonsyn
Sample_SA10	NC_000913:1769917	T>C	EX	1769074:1770186	+	TTA>CTA	L>L	ydiK	syn
Sample_SA10	NC_000913:1794184	T>C	EX	1794172:1795152	-	AAA>AAG	K>K	btuC	syn
Sample_SA10	NC_000913:1799649	A>G	EX	1799393:1799749	-	GTT>GCT	V>A	rplT	nonsyn
Sample_SA10	NC_000913:1817109	G>A	EX	1816386:1817135	-	GCC>GCT	A>A	chbG	syn
Sample_SA10	NC_000913:1827907	G>A	EX	1826916:1828259	-	GCC>GTC	A>V	astB	nonsyn
Sample_SA10	NC_000913:1846112	C>T	EX	1844999:1846960	-	CGG>CGA	R>R	topB	syn
Sample_SA10	NC_000913:1863664	T>C	EX	1862771:1863766	+	GGT>GGC	G>G	gapA	syn
Sample_SA10	NC_000913:1895061	T>C	EX	1894805:1896166	+	GTG>GCG	V>A	pabB	nonsyn
Sample_SA10	NC_000913:1930363	G>A	EX	1930034:1930390	-	CTG>TTG	L>L	yebF	syn
Sample_SA10	NC_000913:1992187	T>C	IG
Sample_SA10	NC_000913:2048314	T>C	EX	2044938:2052014	+	CTG>CCG	L>P	yeeJ	nonsyn
Sample_SA10	NC_000913:2083021	A>G	EX	2082756:2084183	+	CAC>CGC	H>R	sbcB	nonsyn
Sample_SA10	NC_000913:2140148	T>C	EX	2139759:2141612	-	AAC>GAC	N>D	asmA	nonsyn
Sample_SA10	NC_000913:2143666	T>C	EX	2143266:2146583	+	GTT>GCT	V>A	yegE	nonsyn
Sample_SA10	NC_000913:2151804	T>C	EX	2151711:2152472	-	TTA>TTG	L>L	yegK	syn
Sample_SA10	NC_000913:2153965	G>A	IG
Sample_SA10	NC_000913:2175843	T>C	EX	2175059:2176321	-	CAG>CGG	Q>R	gatZ	nonsyn
Sample_SA10	NC_000913:2196454	T>C	IG
Sample_SA10	NC_000913:2210467	T>C	IG
Sample_SA10	NC_000913:2244481	A>G	EX	2243910:2244746	+	GAC>GGC	D>G	yeiG	nonsyn
Sample_SA10	NC_000913:2293135	G>A	EX	2292961:2294904	-	GCC>GCT	A>A	ccmF	syn
Sample_SA10	NC_000913:2406978	T>C	IG
Sample_SA10	NC_000913:2407779	T>C	EX	2407561:2408778	+	GGT>GGC	G>G	alaA	syn
Sample_SA10	NC_000913:2431513	C>T	EX	2431022:2431684	-	GCC>ACC	A>T	dedD	nonsyn
Sample_SA10	NC_000913:2436402	A>G	EX	2435636:2436649	-	GTT>GCT	V>A	usg	nonsyn
Sample_SA10	NC_000913:2516810	T>C	EX	2515643:2517832	-	GAA>GAG	E>E	yfeA	syn
Sample_SA10	NC_000913:2524928	T>C	IG
Sample_SA10	NC_000913:2526463	G>A	EX	2525930:2526856	-	CAG>TAG	Q>*	yfeR	nonsyn
Sample_SA10	NC_000913:2554868	A>G	EX	2554130:2555182	-	GGT>GGC	G>G	eutR	syn
Sample_SA10	NC_000913:2566096	G>A	EX	2565481:2566884	-	GGC>GGT	G>G	eutA	syn
Sample_SA10	NC_000913:2598578	A>G	EX	2597831:2598865	-	CGT>CGC	R>R	bamC	syn
Sample_SA10	NC_000913:2610497	T>C	EX	2610164:2610709	+	TTC>CTC	F>L	hyfH	nonsyn
Sample_SA10	NC_000913:2664759	T>C	EX	2664390:2665244	+	TCC>CCC	S>P	yfhR	nonsyn
Sample_SA10	NC_000913:2692139	A>G	EX	2691656:2695543	-	TGT>TGC	C>C	purL	syn
Sample_SA10	NC_000913:2715155	A>G	EX	2714439:2715320	-	TGC>CGC	C>R	yfiE	nonsyn
Sample_SA10	NC_000913:2744022	G>A	EX	2743625:2744107	+	GGA>GAA	G>E	yfiB	nonsyn
Sample_SA10	NC_000913:2761400	T>C	EX	2761351:2763540	-	TAC>TGC	Y>C	yfjK	nonsyn
Sample_SA10	NC_000913:2818004	G>A	IG
Sample_SA10	NC_000913:2828291	T>C	EX	2827737:2828516	+	GGT>GGC	G>G	srlD	syn
Sample_SA10	NC_000913:2868594	T>C	EX	2867614:2868753	-	ACG>GCG	T>A	nlpD	nonsyn
Sample_SA10	NC_000913:2918665	A>G	EX	2918045:2919385	-	TCG>CCG	S>P	gudD	nonsyn
Sample_SA10	NC_000913:2936203	C>T	EX	2935584:2937359	+	GCG>GTG	A>V	fucI	nonsyn
Sample_SA10	NC_000913:2943563	T>C	EX	2943337:2944542	+	CTG>CCG	L>P	csdA	nonsyn
Sample_SA10	NC_000913:2951471	G>A	EX	2950635:2952461	-	CGC>TGC	R>C	recD	nonsyn
Sample_SA10	NC_000913:2980025	A>G	EX	2979943:2980635	-	GTG>GCG	V>A	ygeA	nonsyn
Sample_SA10	NC_000913:3012054	T>C	EX	3011461:3012393	+	GGT>GGC	G>G	yqeA	syn
Sample_SA10	NC_000913:3017658	T>C	EX	3016060:3019158	+	GGT>GGC	G>G	ygfK	syn
Sample_SA10	NC_000913:3029206	T>C	EX	3029012:3030931	-	AGC>GGC	S>G	ygfT	nonsyn
Sample_SA10	NC_000913:3039969	T>C	EX	3039855:3040376	+	TCC>CCC	S>P	fldB	nonsyn
Sample_SA10	NC_000913:3071128	A>G	EX	3070165:3071244	-	GGT>GGC	G>G	fbaA	syn
Sample_SA10	NC_000913:3074107	T>C	EX	3073976:3074689	-	ACG>GCG	T>A	yggC	nonsyn
Sample_SA10	NC_000913:3099903	A>G	EX	3099682:3100728	-	TTC>CTC	F>L	ansB	nonsyn
Sample_SA10	NC_000913:3139939	A>G	EX	3139716:3139964	-	GTG>GCG	V>A	hybG	nonsyn
Sample_SA10	NC_000913:3165243	A>G	EX	3163715:3165973	-	GTG>GCG	V>A	parC	nonsyn
Sample_SA10	NC_000913:3183451	T>C	IG
Sample_SA10	NC_000913:3213517	T>C	EX	3213047:3214888	+	CGT>CGC	R>R	rpoD	syn
Sample_SA10	NC_000913:3265539	T>C	EX	3265039:3266028	-	ACG>GCG	T>A	tdcB	nonsyn
Sample_SA10	NC_000913:3292303	T>C	EX	3291341:3292432	+	GGT>GGC	G>G	yraK	syn
Sample_SA10	NC_000913:3294412	T>C	EX	3293400:3295436	+	GTA>GCA	V>A	lpoA	nonsyn
Sample_SA10	NC_000913:3313066	A>G	EX	3312777:3313178	-	GTT>GCT	V>A	rbfA	nonsyn
Sample_SA10	NC_000913:3324255	T>C	EX	3324063:3324911	-	TCA>TCG	S>S	folP	syn
Sample_SA10	NC_000913:3380142	G>A	IG
Sample_SA10	NC_000913:3416145	G>A	EX	3415033:3418137	+	GCG>GCA	A>A	acrF	syn
Sample_SA10	NC_000913:3466199	T>C	EX	3465543:3466220	+	TAT>TAC	Y>Y	gspO	syn
Sample_SA10	NC_000913:3614586	G>A	EX	3613667:3615241	+	GGC>GAC	G>D	nikA	nonsyn
Sample_SA10	NC_000913:3616489	T>C	EX	3616182:3617015	+	GTT>GCT	V>A	nikC	nonsyn
Sample_SA10	NC_000913:3703756	T>C	EX	3702865:3703848	-	AAA>AAG	K>K	dppD	syn
Sample_SA10	NC_000913:3721437	G>A	EX	3721198:3722049	+	CAG>CAA	Q>Q	insK	syn
Sample_SA10	NC_000913:3731426	T>C	EX	3731131:3732123	+	GTA>GCA	V>A	xylF	nonsyn
Sample_SA10	NC_000913:3793887	A>G	IG
Sample_SA10	NC_000913:3806593	G>A	EX	3805943:3807067	-	CCT>TCT	P>S	waaG	nonsyn
Sample_SA10	NC_000913:3852408	T>C	EX	3851096:3852784	-	GAC>GGC	D>G	ilvB	nonsyn
Sample_SA10	NC_000913:3884971	A>G	EX	3884816:3885073	+	AAA>AAG	K>K	yidD	syn
Sample_SA10	NC_000913:3892492	T>C	EX	3891615:3892790	+	GTT>GCT	V>A	mdtL	nonsyn
Sample_SA10	NC_000913:3894503	T>C	EX	3893881:3894630	+	GTC>GCC	V>A	yieE	nonsyn
Sample_SA10	NC_000913:3933523	T>C	EX	3933351:3933770	+	GTC>GCC	V>A	rbsD	nonsyn
Sample_SA10	NC_000913:4106733	T>C	EX	4106469:4107371	+	TTT>CTT	F>L	fieF	nonsyn
Sample_SA10	NC_000913:4222783	G>A	IG
Sample_SA10	NC_000913:4239558	A>G	EX	4237634:4239730	+	GAC>GGC	D>G	yjbH	nonsyn
Sample_SA10	NC_000913:4263323	C>T	EX	4263248:4264231	-	CCG>CCA	P>P	qorA	syn
Sample_SA10	NC_000913:4290621	A>G	EX	4290476:4291432	+	GAC>GGC	D>G	nrfD	nonsyn
Sample_SA10	NC_000913:4294634	A>G	EX	4294481:4295794	+	ATT>GTT	I>V	gltP	nonsyn
Sample_SA10	NC_000913:4308375	T>C	EX	4307783:4308478	-	GAC>GGC	D>G	alsE	nonsyn
Sample_SA10	NC_000913:4329734	C>T	EX	4329360:4330238	+	GCC>GCT	A>A	yjcZ	syn
Sample_SA10	NC_000913:4358956	A>G	EX	4358697:4360031	-	GTA>GCA	V>A	cadB	nonsyn
Sample_SA10	NC_000913:4381975	C>T	EX	4380510:4382318	-	CGT>CAT	R>H	frdA	nonsyn
Sample_SA10	NC_000913:4390288	C>T	EX	4389392:4390360	-	GGC>AGC	G>S	psd	nonsyn
Sample_SA10	NC_000913:4473276	A>G	IG
Sample_SA10	NC_000913:4494859	T>C	EX	4494623:4495186	+	TTT>TTC	F>F	idnK	syn
Sample_SA10	NC_000913:4514829	T>C	EX	4514353:4516677	-	ACC>GCC	T>A	fecA	nonsyn
Sample_SA10	NC_000913:4558188	A>G	EX	4557378:4558289	-	AGT>AGC	S>S	hypT	syn
Sample_SA10	NC_000913:4576500	A>G	IG
Sample_SA10	NC_000913:4589394	A>G	EX	4589129:4591279	-	TTC>TCC	F>S	yjiY	nonsyn
Sample_SA10	NC_000913:4604115	T>C	EX	4603477:4604202	+	GGT>GGC	G>G	yjjQ	syn
Sample_SA10	NC_000913:4611010	C>T	IG
Sample_SA10	NC_000913:4619354	A>G	EX	4618229:4619551	+	ACC>GCC	T>A	deoA	nonsyn
Sample_SD1	NC_000913:33890	A>G	EX	30817:34038	+	GAC>GGC	D>G	carB	nonsyn
Sample_SD1	NC_000913:91061	C>T	EX	91032:91397	+	AGC>AGT	S>S	ftsL	syn
Sample_SD1	NC_000913:121312	G>A	EX	120178:121551	-	AGC>AGT	S>S	aroP	syn
Sample_SD1	NC_000913:130737	A>G	EX	129407:131260	-	GTA>GCA	V>A	yacH	nonsyn
Sample_SD1	NC_000913:145458	A>G	EX	145081:146310	+	GTA>GTG	V>V	yadE	syn
Sample_SD1	NC_000913:183415	A>G	EX	182463:183620	+	GAC>GGC	D>G	cdaR	nonsyn
Sample_SD1	NC_000913:189084	T>C	EX	188712:189506	-	AAA>AAG	K>K	map	syn
Sample_SD1	NC_000913:208448	A>G	EX	205126:208608	+	CAC>CGC	H>R	dnaE	nonsyn
Sample_SD1	NC_000913:231670	C>T	EX	231122:231922	+	GGC>GGT	G>G	yafD	syn
Sample_SD1	NC_000913:280736	A>G	IG
Sample_SD1	NC_000913:305471	A>G	EX	305174:306817	-	GGT>GGC	G>G	ecpD	syn
Sample_SD1	NC_000913:360923	A>G	EX	359992:361146	+	CAC>CGC	H>R	cynX	nonsyn
Sample_SD1	NC_000913:364368	A>G	EX	363231:366305	-	CGT>CGC	R>R	lacZ	syn
Sample_SD1	NC_000913:379208	T>C	EX	378462:379571	-	ACC>GCC	T>A	frmA	nonsyn
Sample_SD1	NC_000913:391311	A>G	IG
Sample_SD1	NC_000913:418620	C>T	EX	417889:419184	+	CAC>CAT	H>H	phoR	syn
Sample_SD1	NC_000913:431606	A>G	EX	431129:432013	-	CGT>CGC	R>R	tsx	syn
Sample_SD1	NC_000913:539731	A>G	EX	539147:540508	+	GAA>GAG	E>E	allB	syn
Sample_SD1	NC_000913:585383	A>G	EX	584680:585633	-	ATA>ACA	I>T	ompT	nonsyn
Sample_SD1	NC_000913:605741	A>G	EX	605518:605886	-	GTC>GCC	V>A	ybdF	nonsyn
Sample_SD1	NC_000913:657611	A>G	EX	657555:657938	-	TCT>CCT	S>P	flc	nonsyn
Sample_SD1	NC_000913:669991	A>G	EX	669931:670572	-	TGT>TGC	C>C	nadD	syn
Sample_SD1	NC_000913:701560	A>G	EX	700374:701594	-	GTT>GCT	V>A	nagC	nonsyn
Sample_SD1	NC_000913:702814	C>T	EX	702811:703611	-	CTG>CTA	L>L	nagB	syn
Sample_SD1	NC_000913:773754	A>G	EX	773042:774181	+	TAC>TGC	Y>C	cydB	nonsyn
Sample_SD1	NC_000913:783973	T>C	EX	783882:784823	-	CAC>CGC	H>R	zitB	nonsyn
Sample_SD1	NC_000913:790674	A>G	EX	789983:791029	-	CTG>CCG	L>P	galT	nonsyn
Sample_SD1	NC_000913:792556	C>T	EX	792316:793788	-	CTG>CTA	L>L	modF	syn
Sample_SD1	NC_000913:793064	A>G	EX	792316:793788	-	CTG>CCG	L>P	modF	nonsyn
Sample_SD1	NC_000913:985851	A>G	IG
Sample_SD1	NC_000913:1016986	A>G	EX	1016539:1018299	-	AGT>AGC	S>S	ycbZ	syn
Sample_SD1	NC_000913:1035782	C>T	EX	1035770:1036357	+	CGC>TGC	R>C	hyaD	nonsyn
Sample_SD1	NC_000913:1070852	T>C	EX	1070365:1070955	-	GAG>GGG	E>G	rutE	nonsyn
Sample_SD1	NC_000913:1100614	A>G	EX	1100296:1100787	+	ACG>GCG	T>A	ycdZ	nonsyn
Sample_SD1	NC_000913:1134944	A>G	EX	1134729:1135511	+	GTA>GTG	V>V	flgG	syn
Sample_SD1	NC_000913:1136183	A>G	EX	1135564:1136262	+	TAC>TGC	Y>C	flgH	nonsyn
Sample_SD1	NC_000913:1142481	A>G	EX	1141182:1144367	-	CGT>CGC	R>R	rne	syn
Sample_SD1	NC_000913:1208891	G>A	EX	1208517:1209119	-	CAT>TAT	H>Y	tfaE	nonsyn
Sample_SD1	NC_000913:1210086	A>G	EX	1209685:1210239	+	GGA>GGG	G>G	pinE	syn
Sample_SD1	NC_000913:1226736	A>G	EX	1226600:1226968	+	AAC>AGC	N>S	ycgJ	nonsyn
Sample_SD1	NC_000913:1267219	A>G	EX	1266924:1267316	+	CAC>CGC	H>R	ychQ	nonsyn
Sample_SD1	NC_000913:1286361	T>C	EX	1285849:1286526	+	GGT>GGC	G>G	narI	syn
Sample_SD1	NC_000913:1287831	A>G	EX	1287782:1288624	-	GTA>GCA	V>A	purU	nonsyn
Sample_SD1	NC_000913:1292781	C>T	EX	1292509:1292922	-	GCT>ACT	A>T	hns	nonsyn
Sample_SD1	NC_000913:1344096	A>G	EX	1343597:1344346	-	GTT>GCT	V>A	yciT	nonsyn
Sample_SD1	NC_000913:1388134	T>C	EX	1386720:1388261	+	GTA>GCA	V>A	tyrR	nonsyn
Sample_SD1	NC_000913:1414506	A>G	EX	1413984:1414793	-	GGT>GGC	G>G	recT	syn
Sample_SD1	NC_000913:1422027	A>G	EX	1421983:1422729	+	AGA>AGG	R>R	ydaV	syn
Sample_SD1	NC_000913:1478849	T>C	EX	1478226:1479122	+	GGT>GGC	G>G	ynbB	syn
Sample_SD1	NC_000913:1492017	T>C	EX	1491962:1492129	-	GAC>GGC	D>G	mokB	nonsyn
Sample_SD1	NC_000913:1508046	A>G	EX	1506781:1508742	+	GAA>GAG	E>E	ydcP	syn
Sample_SD1	NC_000913:1535149	A>G	EX	1534965:1535858	-	GTA>GCA	V>A	yddE	nonsyn
Sample_SD1	NC_000913:1567094	A>G	EX	1565758:1567140	-	GTC>GCC	V>A	dosC	nonsyn
Sample_SD1	NC_000913:1632833	C>T	IG
Sample_SD1	NC_000913:1644942	C>T	IG
Sample_SD1	NC_000913:1648169	T>C	EX	1647934:1648341	+	GTT>GCT	V>A	dicA	nonsyn
Sample_SD1	NC_000913:1691762	C>T	EX	1691586:1692851	-	GGC>AGC	G>S	uidC	nonsyn
Sample_SD1	NC_000913:1770723	G>A	EX	1770615:1770971	+	GAA>AAA	E>K	ydiL	nonsyn
Sample_SD1	NC_000913:1773216	G>A	EX	1772512:1773777	+	TGG>TGA	W>*	ydiN	nonsyn
Sample_SD1	NC_000913:1795155	T>C	IG
Sample_SD1	NC_000913:1822699	T>C	EX	1822458:1823285	+	GTA>GCA	V>A	nadE	nonsyn
Sample_SD1	NC_000913:1868837	T>C	EX	1866908:1868842	+	TCT>CCT	S>P	yeaG	nonsyn
Sample_SD1	NC_000913:1922232	A>T	EX	1922121:1922312	+	ATC>TTC	I>F	yebW	nonsyn
Sample_SD1	NC_000913:1927048	A>G	EX	1926779:1928839	-	TAT>CAT	Y>H	ptrB	nonsyn
Sample_SD1	NC_000913:1965142	T>C	EX	1965043:1966191	-	AAA>AAG	K>K	flhB	syn
Sample_SD1	NC_000913:1990832	T>C	EX	1989681:1990892	+	GGT>GGC	G>G	tyrP	syn
Sample_SD1	NC_000913:2002931	T>C	EX	2002110:2003606	-	ACT>GCT	T>A	fliC	nonsyn
Sample_SD1	NC_000913:2010183	T>C	EX	2009821:2010489	+	GCT>GCC	A>A	yedK	syn
Sample_SD1	NC_000913:2011155	A>G	IG
Sample_SD1	NC_000913:2037511	T>C	EX	2036794:2038152	-	GAA>GAG	E>E	yedV	syn
Sample_SD1	NC_000913:2071978	T>C	EX	2071539:2074658	+	GTG>GCG	V>A	flu	nonsyn
Sample_SD1	NC_000913:2110221	C>T	EX	2110138:2111019	-	GAG>AAG	E>K	rfbA	nonsyn
Sample_SD1	NC_000913:2187335	C>T	IG
Sample_SD1	NC_000913:2235342	A>G	EX	2235265:2236500	+	GTA>GTG	V>V	preA	syn
Sample_SD1	NC_000913:2248348	A>G	EX	2247063:2248532	-	GTT>GCT	V>A	lysP	nonsyn
Sample_SD1	NC_000913:2265635	T>C	EX	2265450:2266022	+	GTT>GTC	V>V	yeiP	syn
Sample_SD1	NC_000913:2288882	A>G	IG
Sample_SD1	NC_000913:2299714	T>C	EX	2299565:2300260	-	AGC>GGC	S>G	napG	nonsyn
Sample_SD1	NC_000913:2480487	T>C	EX	2479202:2480530	+	GTG>GCG	V>A	dsdA	nonsyn
Sample_SD1	NC_000913:2550256	T>C	EX	2549646:2550545	-	CAC>CGC	H>R	yfeX	nonsyn
Sample_SD1	NC_000913:2553479	T>C	EX	2553225:2554124	+	AGT>AGC	S>S	hemF	syn
Sample_SD1	NC_000913:2566338	T>C	EX	2565481:2566884	-	ACC>GCC	T>A	eutA	nonsyn
Sample_SD1	NC_000913:2592679	A>G	EX	2591607:2592734	+	GAC>GGC	D>G	dapE	nonsyn
Sample_SD1	NC_000913:2594054	T>C	EX	2593844:2595859	-	TTA>TTG	L>L	tmcA	syn
Sample_SD1	NC_000913:2621332	G>A	EX	2621197:2622234	+	GGT>AGT	G>S	purM	nonsyn
Sample_SD1	NC_000913:2627351	G>A	EX	2626695:2628938	-	CGC>TGC	R>C	yfgF	nonsyn
Sample_SD1	NC_000913:2692668	A>G	EX	2691656:2695543	-	GTT>GCT	V>A	purL	nonsyn
Sample_SD1	NC_000913:2721992	T>C	EX	2719953:2722613	+	GCT>GCC	A>A	pka	syn
Sample_SD1	NC_000913:2733045	A>C	EX	2731600:2734173	-	TCT>GCT	S>A	clpB	nonsyn
Sample_SD1	NC_000913:2746375	G>A	IG
Sample_SD1	NC_000913:2756764	T>C	EX	2756159:2757400	+	GCT>GCC	A>A	intA	syn
Sample_SD1	NC_000913:2838598	T>C	EX	2838254:2839264	-	ACG>GCG	T>A	ascG	nonsyn
Sample_SD1	NC_000913:2855702	T>C	EX	2854338:2856416	+	CGT>CGC	R>R	fhlA	syn
Sample_SD1	NC_000913:2886013	A>G	EX	2884553:2887219	-	TGT>CGT	C>R	ygcB	nonsyn
Sample_SD1	NC_000913:2911075	A>G	EX	2910756:2911091	-	GTA>GCA	V>A	mazF	nonsyn
Sample_SD1	NC_000913:2911586	T>C	EX	2911417:2913651	-	AAC>AGC	N>S	relA	nonsyn
Sample_SD1	NC_000913:2929723	T>C	EX	2929576:2930943	+	TAC>CAC	Y>H	sdaB	nonsyn
Sample_SD1	NC_000913:2945196	T>C	EX	2945036:2945842	-	GAC>GGC	D>G	tcdA	nonsyn
Sample_SD1	NC_000913:2955650	T>C	EX	2952461:2956003	-	GAA>GAG	E>E	recB	syn
Sample_SD1	NC_000913:3017202	C>T	EX	3016060:3019158	+	CGC>CGT	R>R	ygfK	syn
Sample_SD1	NC_000913:3017955	T>C	EX	3016060:3019158	+	AAT>AAC	N>N	ygfK	syn
Sample_SD1	NC_000913:3041098	A>G	IG
Sample_SD1	NC_000913:3042160	T>C	EX	3041313:3042293	+	GTA>GCA	V>A	ygfZ	nonsyn
Sample_SD1	NC_000913:3044583	A>G	EX	3043662:3045101	+	ACC>GCC	T>A	bglA	nonsyn
Sample_SD1	NC_000913:3046737	A>G	EX	3046168:3049041	-	TAC>CAC	Y>H	gcvP	nonsyn
Sample_SD1	NC_000913:3068749	A>G	EX	3068173:3068808	-	GGT>GGC	G>G	argO	syn
Sample_SD1	NC_000913:3091837	T>C	EX	3091134:3091865	+	CTA>CCA	L>P	rsmE	nonsyn
Sample_SD1	NC_000913:3119661	G>A	EX	3119597:3121279	-	GCC>GTC	A>V	glcA	nonsyn
Sample_SD1	NC_000913:3240683	T>C	EX	3239944:3241188	+	TTC>TCC	F>S	sstT	nonsyn
Sample_SD1	NC_000913:3254390	T>C	EX	3254319:3255020	+	TTT>TTC	F>F	yhaK	syn
Sample_SD1	NC_000913:3283105	T>C	EX	3281976:3283130	+	GTA>GCA	V>A	agaS	nonsyn
Sample_SD1	NC_000913:3291108	T>C	EX	3288814:3291330	+	GGT>GGC	G>G	yraJ	syn
Sample_SD1	NC_000913:3319068	T>C	EX	3318637:3319980	+	GGT>GGC	G>G	argG	syn
Sample_SD1	NC_000913:3342449	T>C	EX	3342273:3342839	+	GGT>GGC	G>G	kdsC	syn
Sample_SD1	NC_000913:3348006	G>A	EX	3347966:3348238	+	GGC>GAC	G>D	npr	nonsyn
Sample_SD1	NC_000913:3395203	T>C	EX	3392458:3396258	-	ATA>ATG	I>M	yhdP	nonsyn
Sample_SD1	NC_000913:3440620	T>C	EX	3440040:3441029	-	AAC>AGC	N>S	rpoA	nonsyn
Sample_SD1	NC_000913:3450637	T>C	EX	3450543:3451364	-	CAC>CGC	H>R	rplB	nonsyn
Sample_SD1	NC_000913:3458239	G>A	EX	3456377:3458329	+	GGG>GGA	G>G	gspD	syn
Sample_SD1	NC_000913:3499418	T>C	IG
Sample_SD1	NC_000913:3618578	T>C	EX	3617776:3618582	+	GTT>GCT	V>A	nikE	nonsyn
Sample_SD1	NC_000913:3630082	A>G	EX	3629535:3630602	-	GTA>GCA	V>A	yhiI	nonsyn
Sample_SD1	NC_000913:3677575	T>C	EX	3676290:3678350	-	AAC>AGC	N>S	yhjG	nonsyn
Sample_SD1	NC_000913:3701922	T>C	EX	3701864:3702868	-	TAC>TGC	Y>C	dppF	nonsyn
Sample_SD1	NC_000913:3720631	T>C	IG
Sample_SD1	NC_000913:3735775	T>C	EX	3734979:3736157	+	GTC>GCC	V>A	xylR	nonsyn
Sample_SD1	NC_000913:3769067	A>G	IG
Sample_SD1	NC_000913:3833893	A>G	EX	3832219:3834537	-	TGT>TGC	C>C	yicI	syn
Sample_SD1	NC_000913:3923814	A>G	EX	3923744:3925633	-	GTC>GCC	V>A	mnmG	nonsyn
Sample_SD1	NC_000913:3924134	A>G	EX	3923744:3925633	-	ACT>ACC	T>T	mnmG	syn
Sample_SD1	NC_000913:4010584	T>C	EX	4010200:4011000	+	TTC>CTC	F>L	yigL	nonsyn
Sample_SD1	NC_000913:4054526	A>G	EX	4053869:4055278	-	CGT>CGC	R>R	glnG	syn
Sample_SD1	NC_000913:4060914	A>G	EX	4060447:4061157	+	GAA>GAG	E>E	yihL	syn
Sample_SD1	NC_000913:4138620	C>T	EX	4137932:4139035	-	CGC>CAC	R>H	gldA	nonsyn
Sample_SD1	NC_000913:4154320	T>C	EX	4153696:4154847	-	GTA>GTG	V>V	argE	syn
Sample_SD1	NC_000913:4220944	A>G	EX	4220301:4222487	-	GTA>GCA	V>A	arpA	nonsyn
Sample_SD1	NC_000913:4227060	C>T	EX	4223828:4227511	+	GCG>GTG	A>V	metH	nonsyn
Sample_SD1	NC_000913:4246891	A>G	EX	4246784:4247899	+	GGA>GGG	G>G	malK	syn
Sample_SD1	NC_000913:4271839	C>T	EX	4271049:4273871	-	GGG>GAG	G>E	uvrA	nonsyn
Sample_SD1	NC_000913:4279363	T>C	EX	4278479:4279828	+	GGT>GGC	G>G	yjcD	syn
Sample_SD1	NC_000913:4291792	C>T	EX	4291512:4293170	+	GCC>GTC	A>V	nrfE	nonsyn
Sample_SD1	NC_000913:4292761	T>C	EX	4291512:4293170	+	GTC>GCC	V>A	nrfE	nonsyn
Sample_SD1	NC_000913:4300559	A>G	EX	4299564:4301030	-	TGG>CGG	W>R	mdtP	nonsyn
Sample_SD1	NC_000913:4325485	C>T	EX	4325298:4325741	-	GGC>GAC	G>D	yjdN	nonsyn
Sample_SD1	NC_000913:4325816	A>G	IG
Sample_SD1	NC_000913:4432500	T>C	EX	4432091:4433056	-	GAC>GGC	D>G	ytfF	nonsyn
Sample_SD1	NC_000913:4441794	C>T	EX	4441538:4442176	-	GGC>GAC	G>D	msrA	nonsyn
Sample_SD1	NC_000913:4570609	A>G	EX	4570162:4571574	-	GGT>GGC	G>G	yjiR	syn
Sample_SD1	NC_000913:4578348	A>G	EX	4577958:4579337	-	GGT>GGC	G>G	mcrB	syn
Sample_SD2	NC_000913:23795	A>G	EX	22391:25207	+	ACC>GCC	T>A	ileS	nonsyn
Sample_SD2	NC_000913:39019	A>G	EX	37898:39115	-	TTC>CTC	F>L	caiB	nonsyn
Sample_SD2	NC_000913:40401	A>G	IG
Sample_SD2	NC_000913:48089	A>G	EX	47769:49631	+	TTA>TTG	L>L	kefC	syn
Sample_SD2	NC_000913:51659	A>G	EX	51609:52430	-	TGC>CGC	C>R	rsmA	nonsyn
Sample_SD2	NC_000913:55253	A>C	EX	54755:57109	-	CGT>CGG	R>R	lptD	syn
Sample_SD2	NC_000913:109934	T>C	EX	108279:110984	+	GGT>GGC	G>G	secA	syn
Sample_SD2	NC_000913:142429	A>G	EX	142008:142670	-	GTT>GCT	V>A	can	nonsyn
Sample_SD2	NC_000913:213575	T>C	EX	212331:213629	+	GGT>GGC	G>G	tilS	syn
Sample_SD2	NC_000913:222296	A>G	EX	221614:222645	-	GTC>GCC	V>A	metN	nonsyn
Sample_SD2	NC_000913:240080	A>G	EX	239419:240189	-	GTG>GCG	V>A	yafV	nonsyn
Sample_SD2	NC_000913:275370	A>G	EX	275325:276728	+	ACG>GCG	T>A	mmuP	nonsyn
Sample_SD2	NC_000913:388913	A>G	EX	388753:389727	-	GTG>GCG	V>A	hemB	nonsyn
Sample_SD2	NC_000913:395829	A>G	EX	395130:396287	-	CGT>CGC	R>R	ampH	syn
Sample_SD2	NC_000913:408431	A>G	EX	408177:408461	+	GAA>GAG	E>E	yaiE	syn
Sample_SD2	NC_000913:413993	G>A	EX	412607:415753	-	AGC>AGT	S>S	sbcC	syn
Sample_SD2	NC_000913:556497	A>G	EX	556032:556553	-	GGT>GGC	G>G	ybcI	syn
Sample_SD2	NC_000913:568158	A>G	IG
Sample_SD2	NC_000913:595320	T>G	EX	594760:595443	-	ACC>CCC	T>P	cusR	nonsyn
Sample_SD2	NC_000913:610734	A>G	EX	610254:612494	-	GGT>GGC	G>G	fepA	syn
Sample_SD2	NC_000913:702793	C>T	IG
Sample_SD2	NC_000913:708916	A>G	EX	708334:709740	+	ACC>GCC	T>A	chiP	nonsyn
Sample_SD2	NC_000913:769015	T>C	EX	767978:770611	+	AGT>AGC	S>S	mngB	syn
Sample_SD2	NC_000913:811649	A>G	EX	811522:812277	+	TAC>TGC	Y>C	bioC	nonsyn
Sample_SD2	NC_000913:832427	A>G	IG
Sample_SD2	NC_000913:848448	A>G	EX	848408:848911	-	CTG>CCG	L>P	dps	nonsyn
Sample_SD2	NC_000913:855081	A>G	EX	854824:855744	-	TTC>CTC	F>L	ldtB	nonsyn
Sample_SD2	NC_000913:897402	A>G	EX	897084:897929	+	ACC>GCC	T>A	potI	nonsyn
Sample_SD2	NC_000913:943282	A>G	EX	940959:943403	+	GAC>GGC	D>G	dmsA	nonsyn
Sample_SD2	NC_000913:944471	T>C	EX	944033:944896	+	TAC>CAC	Y>H	dmsC	nonsyn
Sample_SD2	NC_000913:951338	A>G	EX	951272:953554	-	CGT>CGC	R>R	pflB	syn
Sample_SD2	NC_000913:992624	A>G	EX	990622:993234	+	TAC>TGC	Y>C	pepN	nonsyn
Sample_SD2	NC_000913:1039612	A>G	EX	1039296:1040432	+	TAT>TGT	Y>C	cbdB	nonsyn
Sample_SD2	NC_000913:1040428	A>G	EX	1039296:1040432	+	TAC>TGC	Y>C	cbdB	nonsyn
Sample_SD2	NC_000913:1061572	T>C	EX	1059256:1061802	+	TAC>CAC	Y>H	torA	nonsyn
Sample_SD2	NC_000913:1144638	A>G	EX	1144502:1144822	+	TAC>TGC	Y>C	yceQ	nonsyn
Sample_SD2	NC_000913:1178150	A>G	EX	1177320:1178564	+	GTA>GTG	V>V	lolE	syn
Sample_SD2	NC_000913:1188128	T>C	EX	1187119:1188240	-	GAC>GGC	D>G	roxA	nonsyn
Sample_SD2	NC_000913:1189239	T>C	EX	1188316:1189776	-	ACC>GCC	T>A	phoQ	nonsyn
Sample_SD2	NC_000913:1202469	T>C	EX	1202259:1202933	-	GTA>GTG	V>V	cohE	syn
Sample_SD2	NC_000913:1266546	T>C	EX	1266094:1266927	+	CGT>CGC	R>R	prmC	syn
Sample_SD2	NC_000913:1276754	A>G	EX	1275822:1277618	-	TAT>CAT	Y>H	narX	nonsyn
Sample_SD2	NC_000913:1293397	A>G	IG
Sample_SD2	NC_000913:1296506	A>G	EX	1295446:1298121	-	GTG>GCG	V>A	adhE	nonsyn
Sample_SD2	NC_000913:1307732	C>T	EX	1307185:1308645	-	GGT>GAT	G>D	clsA	nonsyn
Sample_SD2	NC_000913:1331930	A>G	EX	1331048:1333645	+	ACC>GCC	T>A	topA	nonsyn
Sample_SD2	NC_000913:1345757	G>A	EX	1344757:1346742	-	GCG>GTG	A>V	gmr	nonsyn
Sample_SD2	NC_000913:1358707	T>C	EX	1357802:1359187	-	ACC>GCC	T>A	puuP	nonsyn
Sample_SD2	NC_000913:1376349	A>G	EX	1376034:1376822	+	ACC>GCC	T>A	ycjR	nonsyn
Sample_SD2	NC_000913:1421099	T>C	EX	1420684:1421106	+	GTT>GCT	V>A	ydaT	nonsyn
Sample_SD2	NC_000913:1437772	T>C	EX	1437260:1440784	-	ACA>GCA	T>A	pfo	nonsyn
Sample_SD2	NC_000913:1443300	C>T	EX	1443051:1445690	+	CGC>TGC	R>C	ydbH	nonsyn
Sample_SD2	NC_000913:1450180	A>G	EX	1449076:1451349	-	GGT>GGC	G>G	tynA	syn
Sample_SD2	NC_000913:1464299	A>G	EX	1463539:1464489	+	CAC>CGC	H>R	paaX	nonsyn
Sample_SD2	NC_000913:1467135	T>A	IG
Sample_SD2	NC_000913:1486233	A>G	EX	1483061:1486963	+	AAC>AGC	N>S	hrpA	nonsyn
Sample_SD2	NC_000913:1499263	T>A	EX	1498938:1499477	+	ATC>AAC	I>N	rimL	nonsyn
Sample_SD2	NC_000913:1503637	A>G	IG
Sample_SD2	NC_000913:1535143	T>C	EX	1534965:1535858	-	CAC>CGC	H>R	yddE	nonsyn
Sample_SD2	NC_000913:1542623	T>C	IG
Sample_SD2	NC_000913:1565331	T>C	EX	1563334:1565733	-	ACC>GCC	T>A	dosP	nonsyn
Sample_SD2	NC_000913:1628155	C>T	EX	1627517:1628263	+	AGC>AGT	S>S	ydfG	syn
Sample_SD2	NC_000913:1653293	T>C	EX	1652896:1653915	-	GAC>GGC	D>G	rspB	nonsyn
Sample_SD2	NC_000913:1664397	T>C	EX	1663609:1664463	+	GGT>GGC	G>G	ynfH	syn
Sample_SD2	NC_000913:1672208	A>G	EX	1671960:1672781	+	GGA>GGG	G>G	ydgD	syn
Sample_SD2	NC_000913:1797589	A>G	EX	1795557:1797944	-	CTG>CCG	L>P	pheT	nonsyn
Sample_SD2	NC_000913:1807904	T>C	EX	1807796:1808656	+	TAT>CAT	Y>H	yniA	nonsyn
Sample_SD2	NC_000913:1810080	T>C	IG
Sample_SD2	NC_000913:1810217	G>A	EX	1810211:1810801	+	GCG>ACG	A>T	ydjM	nonsyn
Sample_SD2	NC_000913:1815309	T>C	EX	1813867:1816128	+	GGT>GGC	G>G	katE	syn
Sample_SD2	NC_000913:1913869	A>G	EX	1912768:1914816	-	CGT>CGC	R>R	prc	syn
Sample_SD2	NC_000913:1919279	A>G	EX	1917510:1920143	+	GTA>GTG	V>V	yebT	syn
Sample_SD2	NC_000913:1920226	G>A	EX	1920223:1921662	+	GCC>ACC	A>T	rsmF	nonsyn
Sample_SD2	NC_000913:1985086	A>G	IG
Sample_SD2	NC_000913:2020415	T>C	EX	2020087:2021091	+	CTG>CCG	L>P	fliM	nonsyn
Sample_SD2	NC_000913:2090047	T>C	IG
Sample_SD2	NC_000913:2112606	T>C	EX	2111976:2113061	-	TTA>TTG	L>L	rfbB	syn
Sample_SD2	NC_000913:2126466	T>C	EX	2126225:2127190	-	CAC>CGC	H>R	wcaG	nonsyn
Sample_SD2	NC_000913:2137140	T>C	EX	2136104:2137243	-	GAC>GGC	D>G	wza	nonsyn
Sample_SD2	NC_000913:2322277	A>G	EX	2321866:2323251	+	ACC>GCC	T>A	atoC	nonsyn
Sample_SD2	NC_000913:2348605	T>C	EX	2348514:2348768	+	GTG>GCG	V>A	yfaE	nonsyn
Sample_SD2	NC_000913:2378412	A>G	EX	2377589:2379259	-	GTG>GCG	V>A	menD	nonsyn
Sample_SD2	NC_000913:2407607	A>G	EX	2407561:2408778	+	GAC>GGC	D>G	alaA	nonsyn
Sample_SD2	NC_000913:2436415	T>C	EX	2435636:2436649	-	ACC>GCC	T>A	usg	nonsyn
Sample_SD2	NC_000913:2534863	T>C	EX	2534066:2535793	+	GGT>GGC	G>G	ptsI	syn
Sample_SD2	NC_000913:2564964	G>A	EX	2564523:2565332	+	GCA>ACA	A>T	yffS	nonsyn
Sample_SD2	NC_000913:2566474	T>C	EX	2565481:2566884	-	GCA>GCG	A>A	eutA	syn
Sample_SD2	NC_000913:2570449	T>C	EX	2570348:2571751	-	ACC>GCC	T>A	eutE	nonsyn
Sample_SD2	NC_000913:2597014	T>C	EX	2596905:2597618	-	GAC>GGC	D>G	purC	nonsyn
Sample_SD2	NC_000913:2599939	A>G	EX	2599906:2600478	+	ACT>GCT	T>A	gcvR	nonsyn
Sample_SD2	NC_000913:2617615	G>A	EX	2617578:2617937	+	TGT>TAT	C>Y	yfgD	nonsyn
Sample_SD2	NC_000913:2621751	T>C	EX	2621197:2622234	+	GGT>GGC	G>G	purM	syn
Sample_SD2	NC_000913:2650113	G>A	EX	2647326:2652287	-	GTC>GTT	V>V	yfhM	syn
Sample_SD2	NC_000913:2740737	T>C	EX	2740080:2741150	-	GGA>GGG	G>G	aroF	syn
Sample_SD2	NC_000913:2744967	T>C	EX	2744572:2745339	-	ACC>GCC	T>A	trmD	nonsyn
Sample_SD2	NC_000913:2748849	T>C	EX	2748774:2750060	+	TCC>CCC	S>P	yfjD	nonsyn
Sample_SD2	NC_000913:2752130	T>C	EX	2751795:2753456	+	GTT>GTC	V>V	recN	syn
Sample_SD2	NC_000913:2782229	C>T	EX	2778146:2782726	-	GGG>GGA	G>G	ypjA	syn
Sample_SD2	NC_000913:2821086	A>G	EX	2819381:2822011	-	GTA>GCA	V>A	alaS	nonsyn
Sample_SD2	NC_000913:2835666	T>C	EX	2835173:2837425	-	AAC>AGC	N>S	hypF	nonsyn
Sample_SD2	NC_000913:2851925	T>C	EX	2851864:2852136	+	GTC>GCC	V>A	hypC	nonsyn
Sample_SD2	NC_000913:2859879	C>T	EX	2859760:2860416	+	TTC>TTT	F>F	pphB	syn
Sample_SD2	NC_000913:2870060	A>G	EX	2869513:2870274	-	GTC>GCC	V>A	umpG	nonsyn
Sample_SD2	NC_000913:2905266	T>C	EX	2904747:2905418	-	GAA>GAG	E>E	queE	syn
Sample_SD2	NC_000913:2923624	T>C	EX	2923002:2923784	-	GAC>GGC	D>G	truC	nonsyn
Sample_SD2	NC_000913:2933559	C>T	EX	2933041:2933688	-	GGC>AGC	G>S	fucA	nonsyn
Sample_SD2	NC_000913:2936491	G>A	EX	2935584:2937359	+	CGT>CAT	R>H	fucI	nonsyn
Sample_SD2	NC_000913:2947142	T>C	EX	2946081:2947178	-	ACG>GCG	T>A	mltA	nonsyn
Sample_SD2	NC_000913:2953043	T>C	EX	2952461:2956003	-	GAA>GAG	E>E	recB	syn
Sample_SD2	NC_000913:2967079	G>A	EX	2966188:2968434	-	GGC>GGT	G>G	ptsP	syn
Sample_SD2	NC_000913:2999507	G>A	EX	2999136:2999891	-	CCA>TCA	P>S	ygeR	nonsyn
Sample_SD2	NC_000913:3056462	T>C	EX	3056241:3056789	+	GGT>GGC	G>G	fau	syn
Sample_SD2	NC_000913:3125359	G>A	EX	3124236:3125459	-	ACC>ATC	T>I	glcF	nonsyn
Sample_SD2	NC_000913:3169744	G>A	IG
Sample_SD2	NC_000913:3257784	T>C	EX	3256679:3258010	-	TAC>TGC	Y>C	yhaO	nonsyn
Sample_SD2	NC_000913:3291282	T>C	EX	3288814:3291330	+	GAT>GAC	D>D	yraJ	syn
Sample_SD2	NC_000913:3312944	T>C	EX	3312777:3313178	-	ATC>GTC	I>V	rbfA	nonsyn
Sample_SD2	NC_000913:3337117	A>G	EX	3336963:3337256	-	GTC>GCC	V>A	mlaB	nonsyn
Sample_SD2	NC_000913:3445940	G>A	EX	3445607:3446140	-	ACC>ACT	T>T	rplF	syn
Sample_SD2	NC_000913:3450108	T>C	EX	3449901:3450233	-	AAA>AAG	K>K	rplV	syn
Sample_SD2	NC_000913:3457365	T>C	EX	3456377:3458329	+	GTC>GCC	V>A	gspD	nonsyn
Sample_SD2	NC_000913:3464458	C>T	EX	3463922:3465085	+	GCC>GCT	A>A	gspL	syn
Sample_SD2	NC_000913:3598648	T>C	EX	3598555:3599658	-	GGA>GGG	G>G	livJ	syn
Sample_SD2	NC_000913:3606198	T>C	EX	3605751:3606377	+	TGG>CGG	W>R	yhhN	nonsyn
Sample_SD2	NC_000913:3627880	T>C	EX	3626803:3629538	-	GAA>GAG	E>E	rbbA	syn
Sample_SD2	NC_000913:3686809	C>T	EX	3685700:3689173	-	GAG>AAG	E>K	bcsC	nonsyn
Sample_SD2	NC_000913:3693250	T>C	EX	3692618:3695236	-	ACC>GCC	T>A	bcsA	nonsyn
Sample_SD2	NC_000913:3704261	T>C	EX	3703859:3704761	-	GCA>GCG	A>A	dppC	syn
Sample_SD2	NC_000913:3741470	T>C	EX	3741109:3741582	-	GAC>GGC	D>G	ysaA	nonsyn
Sample_SD2	NC_000913:3818202	T>C	EX	3817760:3818584	+	GTT>GCT	V>A	dinD	nonsyn
Sample_SD2	NC_000913:3865436	T>C	EX	3864612:3866273	-	ACT>GCT	T>A	yidE	nonsyn
Sample_SD2	NC_000913:3870550	T>C	EX	3870438:3871730	-	TAC>TGC	Y>C	dgoT	nonsyn
Sample_SD2	NC_000913:3878369	A>G	EX	3877705:3880119	-	GTA>GCA	V>A	gyrB	nonsyn
Sample_SD2	NC_000913:3895552	A>G	EX	3895272:3896609	-	GTG>GCG	V>A	purP	nonsyn
Sample_SD2	NC_000913:3897093	T>C	EX	3896774:3897439	+	GTA>GCA	V>A	yieH	nonsyn
Sample_SD2	NC_000913:3912376	T>C	EX	3911839:3913668	-	GAA>GAG	E>E	glmS	syn
Sample_SD2	NC_000913:3934279	C>T	EX	3933778:3935283	+	CCG>TCG	P>S	rbsA	nonsyn
Sample_SD2	NC_000913:3975014	A>G	EX	3974467:3975141	+	AAC>AGC	N>S	wecD	nonsyn
Sample_SD2	NC_000913:3997361	C>T	EX	3997183:3997899	+	GCG>GTG	A>V	yigB	nonsyn
Sample_SD2	NC_000913:4058191	A>G	IG
Sample_SD2	NC_000913:4059731	T>C	EX	4058407:4060230	+	GTG>GCG	V>A	typA	nonsyn
Sample_SD2	NC_000913:4066120	T>C	EX	4065809:4067194	-	ACC>GCC	T>A	yihP	nonsyn
Sample_SD2	NC_000913:4108940	A>G	EX	4108834:4109823	+	TAC>TGC	Y>C	sbp	nonsyn
Sample_SD2	NC_000913:4204989	A>G	EX	4204642:4205931	-	TGT>CGT	C>R	purD	nonsyn
Sample_SD2	NC_000913:4214414	G>A	EX	4214280:4215209	+	CCG>CCA	P>P	metA	syn
Sample_SD2	NC_000913:4226986	T>C	EX	4223828:4227511	+	GGT>GGC	G>G	metH	syn
Sample_SD2	NC_000913:4233565	C>A	IG
Sample_SD2	NC_000913:4298514	A>G	EX	4297219:4299366	-	TAT>CAT	Y>H	fdhF	nonsyn
Sample_SD2	NC_000913:4326657	A>G	EX	4326399:4326734	-	TGT>TGC	C>C	yjdM	syn
Sample_SD2	NC_000913:4343503	T>C	EX	4343369:4344790	+	GGT>GGC	G>G	melB	syn
Sample_SD2	NC_000913:4375268	A>G	EX	4374629:4375657	-	CGT>CGC	R>R	epmB	syn
Sample_SD2	NC_000913:4378899	A>G	EX	4377811:4378944	-	TCC>CCC	S>P	ampC	nonsyn
Sample_SD2	NC_000913:4403610	A>G	EX	4403300:4404304	+	TAC>TGC	Y>C	hflC	nonsyn
Sample_SD2	NC_000913:4426784	A>G	EX	4426628:4427422	-	CGT>CGC	R>R	yjfZ	syn
Sample_SD2	NC_000913:4446128	A>G	EX	4444112:4447891	+	ACC>GCC	T>A	tamB	nonsyn
Sample_SD2	NC_000913:4483401	T>C	EX	4480982:4483837	-	GAC>GGC	D>G	valS	nonsyn
Sample_SD2	NC_000913:4525788	A>G	EX	4525015:4525803	-	TGT>CGT	C>R	yjhI	nonsyn
Sample_SD2	NC_000913:4527451	G>A	EX	4526905:4527537	-	AGC>AGT	S>S	sgcE	syn
Sample_SD2	NC_000913:4531226	A>G	EX	4530530:4531651	-	GGT>GGC	G>G	sgcX	syn
Sample_SD2	NC_000913:4540070	A>G	IG
Sample_SD2	NC_000913:4581964	A>G	EX	4581459:4583048	-	GTG>GCG	V>A	hsdM	nonsyn
Sample_SD2	NC_000913:4596900	T>A	EX	4595990:4597012	+	ATC>AAC	I>N	yjjN	nonsyn
Sample_SD2	NC_000913:4610236	T>C	EX	4609414:4611003	+	TGG>CGG	W>R	prfC	nonsyn
Sample_SD2	NC_000913:4638115	A>G	EX	4636696:4638120	+	ACA>GCA	T>A	creC	nonsyn
Sample_SD3	NC_000913:75891	T>G	EX	75644:77299	-	CAT>CCT	H>P	sgrR	nonsyn
Sample_SD3	NC_000913:78138	T>G	EX	77621:78799	+	ATG>AGG	M>R	setA	nonsyn
Sample_SD3	NC_000913:98534	C>T	EX	98403:99647	+	TAC>TAT	Y>Y	ftsW	syn
Sample_SD3	NC_000913:121295	T>G	EX	120178:121551	-	TAC>TCC	Y>S	aroP	nonsyn
Sample_SD3	NC_000913:162028	A>G	EX	161501:162031	-	TCT>CCT	S>P	ligT	nonsyn
Sample_SD3	NC_000913:211083	C>A	EX	209679:211820	+	CCT>ACT	P>T	ldcC	nonsyn
Sample_SD3	NC_000913:250045	A>G	IG
Sample_SD3	NC_000913:284528	A>G	EX	283201:285168	+	AAC>AGC	N>S	yagF	nonsyn
Sample_SD3	NC_000913:286437	A>G	EX	285395:286777	+	TAC>TGC	Y>C	yagG	nonsyn
Sample_SD3	NC_000913:287156	A>G	EX	286789:288399	+	AAC>AGC	N>S	yagH	nonsyn
Sample_SD3	NC_000913:298965	G>A	EX	298736:300934	-	GCG>GTG	A>V	paoC	nonsyn
Sample_SD3	NC_000913:306693	T>G	EX	305174:306817	-	GAA>GCA	E>A	ecpD	nonsyn
Sample_SD3	NC_000913:335849	A>G	EX	335280:335885	+	GAA>GAG	E>E	yahD	syn
Sample_SD3	NC_000913:358860	C>T	EX	358799:359458	+	GCC>GTC	A>V	cynT	nonsyn
Sample_SD3	NC_000913:379681	T>G	EX	379606:379881	-	CGA>CGC	R>R	frmR	syn
Sample_SD3	NC_000913:424678	A>G	EX	424337:424918	-	TGG>CGG	W>R	acpH	nonsyn
Sample_SD3	NC_000913:449009	A>C	EX	448650:450641	-	TCC>GCC	S>A	cyoB	nonsyn
Sample_SD3	NC_000913:481619	C>T	EX	481254:484403	-	GTA>ATA	V>I	acrB	nonsyn
Sample_SD3	NC_000913:482469	T>G	EX	481254:484403	-	GAA>GAC	E>D	acrB	nonsyn
Sample_SD3	NC_000913:493421	A>C	EX	492092:494023	+	AAC>CAC	N>H	dnaX	nonsyn
Sample_SD3	NC_000913:499183	A>G	EX	499014:499973	-	CTG>CCG	L>P	aes	nonsyn
Sample_SD3	NC_000913:527128	A>G	EX	523261:527541	+	ACT>GCT	T>A	rhsD	nonsyn
Sample_SD3	NC_000913:530125	T>C	IG
Sample_SD3	NC_000913:588745	A>G	EX	587982:590954	-	GTC>GCC	V>A	nfrA	nonsyn
Sample_SD3	NC_000913:603397	A>G	IG
Sample_SD3	NC_000913:614464	C>T	EX	614157:618038	+	GCG>GTG	A>V	entF	nonsyn
Sample_SD3	NC_000913:614520	C>T	EX	614157:618038	+	CTG>TTG	L>L	entF	syn
Sample_SD3	NC_000913:638787	C>T	IG
Sample_SD3	NC_000913:718246	T>C	EX	716946:718265	-	AAC>AGC	N>S	potE	nonsyn
Sample_SD3	NC_000913:733104	T>C	EX	729583:733776	+	GGT>GGC	G>G	rhsC	syn
Sample_SD3	NC_000913:733230	A>G	EX	729583:733776	+	CGA>CGG	R>R	rhsC	syn
Sample_SD3	NC_000913:774948	A>C	EX	774752:775156	+	TAT>TCT	Y>S	ybgC	nonsyn
Sample_SD3	NC_000913:794313	A>C	EX	793856:794644	-	CTG>CGG	L>R	modE	nonsyn
Sample_SD3	NC_000913:815052	T>C	EX	813526:815547	+	GGT>GGC	G>G	uvrB	syn
Sample_SD3	NC_000913:835874	A>G	EX	835248:836210	+	GGA>GGG	G>G	ybiB	syn
Sample_SD3	NC_000913:851240	A>G	EX	851014:852597	-	GTC>GCC	V>A	ybiP	nonsyn
Sample_SD3	NC_000913:853001	A>G	IG
Sample_SD3	NC_000913:893940	A>G	EX	893784:894896	+	ACC>GCC	T>A	potF	nonsyn
Sample_SD3	NC_000913:903969	A>G	EX	903952:904467	-	TCC>CCC	S>P	ybjP	nonsyn
Sample_SD3	NC_000913:935795	A>G	EX	933224:937213	+	ACC>GCC	T>A	ftsK	nonsyn
Sample_SD3	NC_000913:957419	T>G	EX	956762:957454	+	TGG>GGG	W>G	ycaP	nonsyn
Sample_SD3	NC_000913:988689	A>G	EX	987585:988985	-	GTT>GTC	V>V	asnS	syn
Sample_SD3	NC_000913:991906	T>C	EX	990622:993234	+	TCG>CCG	S>P	pepN	nonsyn
Sample_SD3	NC_000913:1103937	T>C	IG
Sample_SD3	NC_000913:1130253	A>G	EX	1130204:1130863	-	GTA>GCA	V>A	flgA	nonsyn
Sample_SD3	NC_000913:1154934	A>G	EX	1154112:1155134	+	ACC>GCC	T>A	yceG	nonsyn
Sample_SD3	NC_000913:1211465	T>G	IG
Sample_SD3	NC_000913:1218191	A>G	EX	1217328:1218851	+	CAA>CAG	Q>Q	ycgG	syn
Sample_SD3	NC_000913:1243988	A>G	EX	1243793:1244527	-	GGT>GGC	G>G	ycgR	syn
Sample_SD3	NC_000913:1263822	G>A	EX	1263714:1264970	+	GCG>ACG	A>T	hemA	nonsyn
Sample_SD3	NC_000913:1274435	A>G	EX	1273784:1275178	+	ACA>GCA	T>A	ychO	nonsyn
Sample_SD3	NC_000913:1275824	A>G	EX	1275179:1275829	-	AGT>AGC	S>S	narL	syn
Sample_SD3	NC_000913:1315232	T>C	IG
Sample_SD3	NC_000913:1330616	T>C	EX	1330417:1330668	-	AAC>AGC	N>S	yciN	nonsyn
Sample_SD3	NC_000913:1343204	G>A	EX	1343110:1343328	-	GCA>GTA	A>V	osmB	nonsyn
Sample_SD3	NC_000913:1374318	A>G	EX	1374090:1374932	+	AGT>GGT	S>G	ycjP	nonsyn
Sample_SD3	NC_000913:1445159	A>G	EX	1443051:1445690	+	AAA>AAG	K>K	ydbH	syn
Sample_SD3	NC_000913:1446139	T>C	EX	1445880:1446206	+	CTC>CCC	L>P	ydbL	nonsyn
Sample_SD3	NC_000913:1450206	T>C	EX	1449076:1451349	-	ACC>GCC	T>A	tynA	nonsyn
[truncated: 5,208 more rows]

## Sheet: S3
Table S3. List of indels.
Samples	Chromosome	Position	Reference	Indel	Coding or noncoding	Gene
Sample_A4	NC_000913.3	1212080	A	AC	noncoding
Sample_A4	NC_000913.3	2164553	AGATC	A	EX	baeR
Sample_A5	NC_000913.3	1765931	AG	A	coding	ydiJ
Sample_A9	NC_000913.3	738037	GT	G	noncoding
Sample_A9	NC_000913.3	4491047	CT	C	EX	idnR
Sample_A11	NC_000913.3	1741132	ATATACT	A	noncoding
Sample_A14	NC_000913.3	3690287	AGAC	A	EX	bcsB
Sample_A19	NC_000913.3	2104069	AT	A	EX	wbbK
Sample_A20	NC_000913.3	4527649	G	GC	EX	sgcA
Sample_A26	NC_000913.3	379915	A	AG	noncoding
Sample_A29	NC_000913.3	1832180	TGAATAAAAA	T	noncoding
Sample_D1	NC_000913.3	2765411	CGCACTATGGCACTATGGCACTATG	C	noncoding
Sample_D2	NC_000913.3	4392442	GA	G	noncoding
Sample_D5	NC_000913.3	1172953	GCACCCGGGGCCAGTTTTTCAGCTCTGAGAAGAGCTCGTC	G	coding	mfd
Sample_D11	NC_000913.3	25933	GT	G	coding	fkpB
Sample_D24	NC_000913.3	4392554	G	GA	noncoding
Sample_E7	NC_000913.3	4596814	TA	T	coding	yjjN
Sample_E8	NC_000913.3	3623493	A	AT	coding	yhhH
Sample_E9	NC_000913.3	3762180	G	GC	noncoding
Sample_E13	NC_000913.3	4305437	CGCCAGGTGCAGGGTCTGGTCGTGAATGTACTTGATGGTATCGCGGTATTTACCAATATAATCATTGATATGCTTATTGCCCCAGACCG	C	coding	yjcS
Sample_E22	NC_000913.3	2151059	GA	G	noncoding
Sample_E22	NC_000913.3	3653849	T	TA	noncoding
Sample_E26	NC_000913.3	1198453	AATGAAATG	A	noncoding
Sample_E26	NC_000913.3	2185868	T	TG	noncoding
Sample_E29	NC_000913.3	2229333	GC	G	noncoding
Sample_E31	NC_000913.3	2947590	TA	T	noncoding
Sample_E32	NC_000913.3	1241000	GC	G	coding	cvrA
Sample_F3	NC_000913.3	2008064	CG	C	coding	yedD
Sample_F9	NC_000913.3	1679583	ACTCAC	A	coding	ydgI
Sample_F11	NC_000913.3	832732	GA	G	coding	ybiA
Sample_F13	NC_000913.3	1198453	AATGAAATG	A	noncoding
Sample_F13	NC_000913.3	3799382	AT	A	coding	waaZ
Sample_F14	NC_000913.3	3109351	T	TTTCGCGCGAAACGGCGA	noncoding
Sample_F15	NC_000913.3	3086555	TA	T	noncoding
Sample_F15	NC_000913.3	3611708	GCGGGTTCGGCTA	G	coding	yhhS
Sample_F24	NC_000913.3	3610003	CT	C	coding	dcrB
Sample_F30	NC_000913.3	3378782	GA	G	noncoding
Sample_F32	NC_000913.3	2484535	CA	C	coding	evgS
Sample_G8	NC_000913.3	3746034	GT	G	coding	yiaN
Sample_G11	NC_000913.3	1198453	AATGAAATG	A	noncoding
Sample_G23	NC_000913.3	2257584	GAGCTTC	G	coding	psuG
Sample_H19	NC_000913.3	2694703	CGTAGCGGCCCGTTTCGTGGTCAGCAAA	C	coding	purL
Sample_H21	NC_000913.3	2560977	TGGTGGGTCAAAAGTTGCCGTTAA	T	noncoding
Sample_H35	NC_000913.3	2773408	AT	A	coding	yfjW
Sample_H37	NC_000913.3	3249794	GTGGAGC	G	coding	yqjE
Sample_H41	NC_000913.3	2162643	CTGTCGATGATTATGCAAT	C	coding	mdtD
Sample_H46	NC_000913.3	4506286	C	CA	coding	yjhC
Sample_H48	NC_000913.3	2383438	TA	T	coding	elaD
Sample_SA1	NC_000913.3	299866	C	CG	coding	paoC
Sample_SA1	NC_000913.3	723520	GT	G	coding	kdpD
Sample_SA1	NC_000913.3	1194049	C	CA	coding	nudJ
Sample_SA1	NC_000913.3	1381774	TG	T	noncoding	-
Sample_SA1	NC_000913.3	1555700	T	TG	noncoding	-
Sample_SA1	NC_000913.3	1594124	G	GCC	noncoding	-
Sample_SA1	NC_000913.3	1685536	G	GC	coding	fumC
Sample_SA1	NC_000913.3	1810807	CA	C	noncoding	-
Sample_SA1	NC_000913.3	2039649	G	GC	coding	yedY
Sample_SA1	NC_000913.3	2200446	GA	G	coding	yehI
Sample_SA1	NC_000913.3	2509163	C	CT	coding	glk
Sample_SA1	NC_000913.3	2602010	G	GC	coding	hyfB
Sample_SA1	NC_000913.3	2755670	CA	C	noncoding	-
Sample_SA1	NC_000913.3	2778924	G	GC	coding	ypjA
Sample_SA1	NC_000913.3	2891481	C	CT	coding	cysJ
Sample_SA1	NC_000913.3	2990917	TC	T	noncoding	-
Sample_SA1	NC_000913.3	3086521	C	CA	noncoding	-
Sample_SA1	NC_000913.3	3564090	G	GA	noncoding	-
Sample_SA1	NC_000913.3	3668538	GC	G	coding	yhjA
Sample_SA1	NC_000913.3	3931176	A	AG	noncoding	-
Sample_SA2	NC_000913.3	83572	T	TA	noncoding	-
Sample_SA2	NC_000913.3	107544	GT	G	noncoding	-
Sample_SA2	NC_000913.3	352213	C	CA	coding	prpD
Sample_SA2	NC_000913.3	373705	T	TG	coding	mhpF
Sample_SA2	NC_000913.3	582797	GT	G	noncoding	-
Sample_SA2	NC_000913.3	705963	CT	C	noncoding	-
Sample_SA2	NC_000913.3	873678	G	GA	coding	yliE
Sample_SA2	NC_000913.3	939024	CA	C	coding	rarA
Sample_SA2	NC_000913.3	1011586	G	GA	coding	uup
Sample_SA2	NC_000913.3	1018968	CA	C	noncoding	-
Sample_SA2	NC_000913.3	1096536	CT	C	coding	ycdU
Sample_SA2	NC_000913.3	1210436	TG	T	coding	mcrA
Sample_SA2	NC_000913.3	1232011	GA	G	coding	umuC
Sample_SA2	NC_000913.3	1370035	GT	G	noncoding	-
Sample_SA2	NC_000913.3	1419714	T	TG	noncoding	-
Sample_SA2	NC_000913.3	1774213	A	AG	coding	ydiB
Sample_SA2	NC_000913.3	1871747	G	GT	coding	yeaI
Sample_SA2	NC_000913.3	1883335	T	TG	coding	yeaV
Sample_SA2	NC_000913.3	2128381	T	TC	coding	wcaF
Sample_SA2	NC_000913.3	2178658	GT	G	noncoding	-
Sample_SA2	NC_000913.3	2297107	T	TCC	coding	ccmA
Sample_SA2	NC_000913.3	2758577	GT	G	coding	yfjH
Sample_SA2	NC_000913.3	2824472	G	GCC	noncoding	-
Sample_SA2	NC_000913.3	2869979	T	TC	coding	umpG
Sample_SA2	NC_000913.3	2942893	CT	C	noncoding	-
Sample_SA2	NC_000913.3	2964312	T	TA	noncoding	-
Sample_SA2	NC_000913.3	3001297	C	CG	coding	xdhA
Sample_SA2	NC_000913.3	3303487	GC	G	coding	yhbW
Sample_SA2	NC_000913.3	3379259	T	TC	coding	yhcM
Sample_SA2	NC_000913.3	3627276	T	TG	coding	rbbA
Sample_SA2	NC_000913.3	3664961	GT	G	noncoding	-
Sample_SA2	NC_000913.3	3675371	TG	T	coding	yhjE
Sample_SA2	NC_000913.3	3785015	T	TG	noncoding	-
Sample_SA2	NC_000913.3	3804983	AT	A	coding	waaS
Sample_SA2	NC_000913.3	3864646	T	TG	coding	yidE
Sample_SA2	NC_000913.3	3967998	C	CA	coding	wecA
Sample_SA2	NC_000913.3	3989047	GT	G	coding	hemX
Sample_SA2	NC_000913.3	4474269	A	AC	coding	bdcR
Sample_SA2	NC_000913.3	4556760	GT	G	noncoding	-
Sample_SA3	NC_000913.3	12008	T	TC	noncoding	-
Sample_SA3	NC_000913.3	59170	T	TC	noncoding	-
Sample_SA3	NC_000913.3	285641	T	TG	coding	yagG
Sample_SA3	NC_000913.3	391697	T	TG	noncoding	-
Sample_SA3	NC_000913.3	468263	GT	G	noncoding	-
Sample_SA3	NC_000913.3	798199	GT	G	coding	ybhA
Sample_SA3	NC_000913.3	885891	TA	T	coding	ybjI
Sample_SA3	NC_000913.3	987000	GT	G	noncoding	-
Sample_SA3	NC_000913.3	1059430	T	TG	coding	torA
Sample_SA3	NC_000913.3	1180733	C	CG	coding	ycfZ
Sample_SA3	NC_000913.3	1370035	GT	G	noncoding	-
Sample_SA3	NC_000913.3	1526748	TG	T	coding	yncG
Sample_SA3	NC_000913.3	1594248	T	TCC	noncoding	-
Sample_SA3	NC_000913.3	1741546	A	AT	coding	cfa
Sample_SA3	NC_000913.3	1768435	C	CG	coding	ydiJ
Sample_SA3	NC_000913.3	2018920	GC	G	coding	fliK
Sample_SA3	NC_000913.3	2057929	CA	C	noncoding	-
Sample_SA3	NC_000913.3	2074356	GC	G	coding	flu
Sample_SA3	NC_000913.3	2104873	GA	G	coding	wbbJ
Sample_SA3	NC_000913.3	2165567	GC	G	noncoding	-
Sample_SA3	NC_000913.3	2438718	CA	C	coding	flk
Sample_SA3	NC_000913.3	2896347	T	TC	coding	ygcR
Sample_SA3	NC_000913.3	2942893	CT	C	noncoding	-
Sample_SA3	NC_000913.3	3086116	G	GT	noncoding	-
Sample_SA3	NC_000913.3	3194722	GA	G	noncoding	-
Sample_SA3	NC_000913.3	3922544	GC	G	noncoding	-
Sample_SA3	NC_000913.3	4027233	TA	T	noncoding	-
Sample_SA3	NC_000913.3	4306751	GA	G	noncoding	-
Sample_SA3	NC_000913.3	4410044	GT	G	noncoding	-
Sample_SA3	NC_000913.3	4488572	T	TC	coding	yjgR
Sample_SA3	NC_000913.3	4510357	T	TCC	noncoding	-
Sample_SA6	NC_000913.3	90791	GT	G	coding	rsmH
Sample_SA6	NC_000913.3	285641	T	TG	coding	yagG
Sample_SA6	NC_000913.3	308047	G	GC	coding	ecpC
Sample_SA6	NC_000913.3	375517	G	GT	coding	mhpT
Sample_SA6	NC_000913.3	472736	C	CG	coding	glnK
Sample_SA6	NC_000913.3	543191	CA	C	noncoding	-
Sample_SA6	NC_000913.3	1452760	AT	A	coding	paaZ
Sample_SA6	NC_000913.3	1579863	G	GT	coding	ydeM
Sample_SA6	NC_000913.3	1623230	G	GC	coding	dgcZ
Sample_SA6	NC_000913.3	1855749	G	GT	coding	ydjG
Sample_SA6	NC_000913.3	2286964	G	GC	noncoding	-
Sample_SA6	NC_000913.3	2297107	T	TCC	coding	ccmA
Sample_SA6	NC_000913.3	2326960	GC	G	coding	atoB
Sample_SA6	NC_000913.3	2602010	G	GC	coding	hyfB
Sample_SA6	NC_000913.3	2754776	TA	T	noncoding	-
Sample_SA6	NC_000913.3	3003473	C	CGG	coding	xdhB
Sample_SA6	NC_000913.3	3195072	C	CG	noncoding	-
Sample_SA6	NC_000913.3	3216475	C	CG	coding	yqjH
Sample_SA6	NC_000913.3	3664961	GT	G	noncoding	-
Sample_SA6	NC_000913.3	3884485	A	AC	noncoding	-
Sample_SA6	NC_000913.3	3931176	A	AG	noncoding	-
Sample_SA6	NC_000913.3	3948799	C	CG	coding	yifB
Sample_SA6	NC_000913.3	4060271	GT	G	noncoding	-
Sample_SA6	NC_000913.3	4104073	GT	G	coding	cpxA
Sample_SA6	NC_000913.3	4377985	TG	T	coding	ampC
Sample_SA6	NC_000913.3	4448107	A	AG	coding	ytfP
Sample_SA6	NC_000913.3	4488572	T	TC	coding	yjgR
Sample_SA6	NC_000913.3	4619894	A	AC	coding	deoB
Sample_SA7	NC_000913.3	78716	TG	T	coding	setA
Sample_SA7	NC_000913.3	160858	A	AC	coding	sfsA
Sample_SA7	NC_000913.3	184747	AG	A	coding	yaeI
Sample_SA7	NC_000913.3	220251	CG	C	coding	metQ
Sample_SA7	NC_000913.3	232551	TA	T	noncoding	-
Sample_SA7	NC_000913.3	308267	GC	G	coding	ecpC
Sample_SA7	NC_000913.3	372597	T	TG	coding	mhpD
Sample_SA7	NC_000913.3	472736	C	CG	coding	glnK
Sample_SA7	NC_000913.3	523735	T	TG	coding	rhsD
Sample_SA7	NC_000913.3	590566	CT	C	coding	nfrA
Sample_SA7	NC_000913.3	640331	CA	C	coding	ahpF
Sample_SA7	NC_000913.3	723520	GT	G	coding	kdpD
Sample_SA7	NC_000913.3	751731	A	AG	coding	ybgQ
Sample_SA7	NC_000913.3	868414	GC	G	coding	gsiA
Sample_SA7	NC_000913.3	1104940	G	GT	noncoding	-
Sample_SA7	NC_000913.3	1167897	TG	T	coding	ycfJ
Sample_SA7	NC_000913.3	1338035	A	AG	coding	acnA
Sample_SA7	NC_000913.3	1402469	CG	C	coding	abgB
Sample_SA7	NC_000913.3	1585095	GC	G	coding	ydeP
Sample_SA7	NC_000913.3	1753328	T	TC	coding	ydhV
Sample_SA7	NC_000913.3	1880425	TG	T	coding	leuE
Sample_SA7	NC_000913.3	1974750	G	GC	coding	cheA
Sample_SA7	NC_000913.3	1978434	AG	A	noncoding	-
Sample_SA7	NC_000913.3	2008322	GC	G	coding	yedE
Sample_SA7	NC_000913.3	2087280	T	TG	noncoding	-
Sample_SA7	NC_000913.3	2188037	G	GCC	coding	yehA
Sample_SA7	NC_000913.3	2202730	G	GC	coding	yehI
Sample_SA7	NC_000913.3	2204477	GT	G	noncoding	-
Sample_SA7	NC_000913.3	2282817	TA	T	noncoding	-
Sample_SA7	NC_000913.3	2423821	AT	A	coding	hisP
Sample_SA7	NC_000913.3	2478940	T	TG	coding	dsdX
Sample_SA7	NC_000913.3	2767500	T	TC	noncoding	-
Sample_SA7	NC_000913.3	2792438	GC	G	coding	gabD
Sample_SA7	NC_000913.3	2942033	G	GT	coding	gcvA
Sample_SA7	NC_000913.3	3157706	GC	G	coding	yqhG
Sample_SA7	NC_000913.3	3248593	GT	G	coding	mzrA
Sample_SA7	NC_000913.3	3379259	T	TC	coding	yhcM
Sample_SA7	NC_000913.3	3456797	GC	G	coding	gspD
Sample_SA7	NC_000913.3	3710605	GA	G	noncoding	-
Sample_SA7	NC_000913.3	3802557	GT	G	coding	waaR
Sample_SA7	NC_000913.3	4322236	CT	C	coding	phnF
Sample_SA7	NC_000913.3	4394013	GC	G	coding	queG
Sample_SA7	NC_000913.3	4410044	GT	G	noncoding	-
Sample_SA7	NC_000913.3	4474269	A	AC	coding	bdcR
Sample_SA7	NC_000913.3	4561858	G	GC	coding	yjiJ
Sample_SA7	NC_000913.3	4606207	A	AGG	noncoding	-
Sample_SA7	NC_000913.3	4606322	A	AGG	noncoding	-
Sample_SA8	NC_000913.3	528166	A	AG	noncoding	-
Sample_SA8	NC_000913.3	693452	GA	G	noncoding	-
Sample_SA8	NC_000913.3	723520	GT	G	coding	kdpD
Sample_SA8	NC_000913.3	890111	CG	C	coding	ybjM
Sample_SA8	NC_000913.3	1049676	A	AG	coding	gfcA
Sample_SA8	NC_000913.3	1407414	GT	G	coding	ydaM
Sample_SA8	NC_000913.3	2143678	T	TG	coding	yegE
Sample_SA8	NC_000913.3	2214333	G	GC	coding	yehU
Sample_SA8	NC_000913.3	2266975	T	TG	coding	yeiQ
Sample_SA8	NC_000913.3	2526159	A	AC	coding	yfeR
Sample_SA8	NC_000913.3	2540064	GC	G	coding	cysA
Sample_SA8	NC_000913.3	2996272	TA	T	noncoding	-
Sample_SA8	NC_000913.3	3003895	C	CG	coding	xdhC
Sample_SA8	NC_000913.3	3190657	C	CT	coding	yqiI
Sample_SA8	NC_000913.3	3402905	GC	G	coding	csrD
Sample_SA8	NC_000913.3	3709555	GC	G	coding	eptB
Sample_SA8	NC_000913.3	3811203	CA	C	noncoding	-
Sample_SA8	NC_000913.3	3960646	T	TC	noncoding	-
Sample_SA8	NC_000913.3	3986631	GT	G	noncoding	-
Sample_SA8	NC_000913.3	4361440	GA	G	coding	cadC
Sample_SA8	NC_000913.3	4398250	T	TG	coding	mutL
Sample_SA8	NC_000913.3	4410044	GT	G	noncoding	-
Sample_SA8	NC_000913.3	4498041	A	AG	noncoding	-
Sample_SA9	NC_000913.3	40869	G	GC	coding	caiT
Sample_SA9	NC_000913.3	83572	T	TA	noncoding	-
Sample_SA9	NC_000913.3	285641	T	TG	coding	yagG
Sample_SA9	NC_000913.3	324730	A	AT	coding	ykgH
Sample_SA9	NC_000913.3	723902	GA	G	coding	kdpD
Sample_SA9	NC_000913.3	802391	GA	G	coding	ybhI
Sample_SA9	NC_000913.3	1167897	TG	T	coding	ycfJ
Sample_SA9	NC_000913.3	1597306	A	AC	noncoding	-
Sample_SA9	NC_000913.3	1927235	G	GCC	coding	ptrB
Sample_SA9	NC_000913.3	1978434	AG	A	noncoding	-
Sample_SA9	NC_000913.3	2255550	G	GC	coding	yeiL
Sample_SA9	NC_000913.3	2454287	AT	A	noncoding	-
Sample_SA9	NC_000913.3	2462880	T	TCC	noncoding	-
Sample_SA9	NC_000913.3	2824472	G	GCC	noncoding	-
Sample_SA9	NC_000913.3	2999673	A	AG	coding	ygeR
Sample_SA9	NC_000913.3	3101032	G	GC	coding	yggN
Sample_SA9	NC_000913.3	3337027	A	AC	coding	mlaB
Sample_SA9	NC_000913.3	3950468	GT	G	noncoding	-
Sample_SA9	NC_000913.3	4349647	GT	G	coding	dcuR
Sample_SA9	NC_000913.3	4410044	GT	G	noncoding	-
Sample_SA10	NC_000913.3	301	CT	C	noncoding	-
Sample_SA10	NC_000913.3	20763	T	TA	noncoding	-
Sample_SA10	NC_000913.3	285641	T	TG	coding	yagG
Sample_SA10	NC_000913.3	294745	GT	G	coding	yagM
Sample_SA10	NC_000913.3	367841	TGC	T	coding	mhpR
Sample_SA10	NC_000913.3	564403	G	GT	coding	sfmZ
Sample_SA10	NC_000913.3	646802	G	GC	coding	citG
Sample_SA10	NC_000913.3	723520	GT	G	coding	kdpD
Sample_SA10	NC_000913.3	869339	CG	C	coding	gsiA
Sample_SA10	NC_000913.3	899248	T	TGG	coding	rlmC
Sample_SA10	NC_000913.3	1281576	CG	C	coding	narG
Sample_SA10	NC_000913.3	1514196	GT	G	coding	ydcU
Sample_SA10	NC_000913.3	1573864	A	AT	coding	pqqL
Sample_SA10	NC_000913.3	1594124	G	GCC	noncoding	-
Sample_SA10	NC_000913.3	1679997	C	CG	coding	ydgI
Sample_SA10	NC_000913.3	1709408	T	TCC	coding	rsxD
Sample_SA10	NC_000913.3	1841832	G	GC	coding	nudG
Sample_SA10	NC_000913.3	1873902	T	TC	coding	yeaK
Sample_SA10	NC_000913.3	1945161	A	AC	coding	ruvB
Sample_SA10	NC_000913.3	1987501	G	GT	noncoding	-
Sample_SA10	NC_000913.3	2087280	T	TG	noncoding	-
Sample_SA10	NC_000913.3	2297107	T	TCC	coding	ccmA
Sample_SA10	NC_000913.3	2470403	G	GT	coding	gtrS
Sample_SA10	NC_000913.3	2742530	C	CA	coding	yfiN
Sample_SA10	NC_000913.3	3001297	C	CG	coding	xdhA
Sample_SA10	NC_000913.3	3234344	G	GT	coding	higB
Sample_SA10	NC_000913.3	3401711	A	AC	coding	csrD
Sample_SA10	NC_000913.3	3909446	GC	G	coding	pstC
Sample_SA10	NC_000913.3	3915442	A	AG	noncoding	-
Sample_SA10	NC_000913.3	4358633	T	TA	noncoding	-
Sample_SA10	NC_000913.3	4438766	GC	G	coding	ytfJ
Sample_SA10	NC_000913.3	4517087	CG	C	coding	fecR
Sample_SA10	NC_000913.3	4556760	GT	G	noncoding	-
Sample_SD1	NC_000913.3	74961	CT	C	coding	thiB
Sample_SD1	NC_000913.3	285641	T	TG	coding	yagG
Sample_SD1	NC_000913.3	304946	C	CG	coding	ecpE
Sample_SD1	NC_000913.3	308047	GC	G	coding	ecpC
Sample_SD1	NC_000913.3	367841	TGC	T	coding	mhpR
Sample_SD1	NC_000913.3	529047	C	CT	noncoding	-
Sample_SD1	NC_000913.3	562667	T	TC	coding	sfmH
Sample_SD1	NC_000913.3	585297	CG	C	coding	ompT
Sample_SD1	NC_000913.3	646802	G	GCC	coding	citG
Sample_SD1	NC_000913.3	658820	GT	G	noncoding	-
Sample_SD1	NC_000913.3	1112243	T	TG	coding	opgH
Sample_SD1	NC_000913.3	1212080	A	AC	noncoding	-
Sample_SD1	NC_000913.3	1799153	CA	C	noncoding	-
Sample_SD1	NC_000913.3	1841832	G	GC	coding	nudG
Sample_SD1	NC_000913.3	2074356	G	GC	coding	flu
Sample_SD1	NC_000913.3	2132563	G	GC	coding	wcaA
Sample_SD1	NC_000913.3	2726010	AT	A	noncoding	-
Sample_SD1	NC_000913.3	2947706	G	GT	noncoding	-
Sample_SD1	NC_000913.3	3001297	C	CG	coding	xdhA
Sample_SD1	NC_000913.3	3017431	G	GC	coding	ygfK
Sample_SD1	NC_000913.3	3079110	GC	G	coding	cmtB
Sample_SD1	NC_000913.3	3561421	C	CG	coding	glpG
Sample_SD1	NC_000913.3	3648137	G	GT	noncoding	-
Sample_SD1	NC_000913.3	3700897	A	ACT	coding	yhjV
Sample_SD1	NC_000913.3	3793704	TA	T	noncoding	-
Sample_SD1	NC_000913.3	4339503	G	GT	coding	adiA
Sample_SD1	NC_000913.3	4583914	CT	C	coding	hsdR
Sample_SD1	NC_000913.3	4585954	CT	C	coding	hsdR
Sample_SD1	NC_000913.3	4606322	A	AGG	noncoding	-
Sample_SD2	NC_000913.3	285641	T	TG	coding	yagG
Sample_SD2	NC_000913.3	310660	CT	C	coding	ecpA
Sample_SD2	NC_000913.3	336288	GA	G	coding	yahE
Sample_SD2	NC_000913.3	469563	C	CA	coding	mdlA
Sample_SD2	NC_000913.3	1029731	GA	G	coding	rlmI
Sample_SD2	NC_000913.3	1154971	C	CG	coding	yceG
Sample_SD2	NC_000913.3	1399978	T	TCC	coding	ogt
Sample_SD2	NC_000913.3	1690235	CA	C	coding	ydgA
Sample_SD2	NC_000913.3	1727488	C	CGG	coding	nemA
Sample_SD2	NC_000913.3	1841832	G	GC	coding	nudG
Sample_SD2	NC_000913.3	1920198	G	GT	noncoding	-
Sample_SD2	NC_000913.3	1927235	G	GC	coding	ptrB
Sample_SD2	NC_000913.3	1934726	TA	T	noncoding	-
Sample_SD2	NC_000913.3	1973657	A	AC	coding	cheA
Sample_SD2	NC_000913.3	2018524	GC	G	coding	fliK
Sample_SD2	NC_000913.3	2039649	GC	G	coding	yedY
Sample_SD2	NC_000913.3	2087280	T	TG	noncoding	-
Sample_SD2	NC_000913.3	2189371	G	GC	coding	yehB
Sample_SD2	NC_000913.3	2450115	C	CT	coding	yfcP
Sample_SD2	NC_000913.3	2569444	GT	G	coding	eutG
Sample_SD2	NC_000913.3	2695578	A	AG	noncoding	-
Sample_SD2	NC_000913.3	2732856	GT	G	coding	clpB
Sample_SD2	NC_000913.3	2956658	G	GT	coding	ptrA
Sample_SD2	NC_000913.3	2972843	CG	C	coding	lplT
Sample_SD2	NC_000913.3	2996272	TA	T	noncoding	-
Sample_SD2	NC_000913.3	3001297	C	CG	coding	xdhA
Sample_SD2	NC_000913.3	3232028	G	GC	coding	fadH
Sample_SD2	NC_000913.3	3258242	AG	A	noncoding	-
Sample_SD2	NC_000913.3	3270546	T	TC	noncoding	-
Sample_SD2	NC_000913.3	3349720	GC	G	coding	mtgA
Sample_SD2	NC_000913.3	3484082	T	TC	coding	yheT
Sample_SD2	NC_000913.3	3655675	GC	G	coding	yhiD
Sample_SD2	NC_000913.3	3728110	TC	T	coding	xylB
Sample_SD2	NC_000913.3	3785130	GA	G	noncoding	-
Sample_SD2	NC_000913.3	3847553	C	CA	coding	uhpC
Sample_SD2	NC_000913.3	4404585	C	CA	noncoding	-
Sample_SD2	NC_000913.3	4500977	A	AC	noncoding	-
Sample_SD2	NC_000913.3	4530064	A	AG	coding	sgcC
Sample_SD2	NC_000913.3	4606207	A	AGG	noncoding	-
Sample_SD3	NC_000913.3	111224	A	AC	coding	mutT
Sample_SD3	NC_000913.3	229036	GT	G	noncoding	-
Sample_SD3	NC_000913.3	543191	CA	C	noncoding	-
Sample_SD3	NC_000913.3	705963	CT	C	noncoding	-
Sample_SD3	NC_000913.3	816920	TA	T	noncoding	-
Sample_SD3	NC_000913.3	957458	TA	T	noncoding	-
Sample_SD3	NC_000913.3	1018968	C	CA	noncoding	-
Sample_SD3	NC_000913.3	1096173	TG	T	coding	ycdU
Sample_SD3	NC_000913.3	1370035	GT	G	noncoding	-
Sample_SD3	NC_000913.3	1447741	T	TG	coding	feaB
Sample_SD3	NC_000913.3	1453480	CG	C	coding	paaZ
Sample_SD3	NC_000913.3	1467160	A	AG	noncoding	-
Sample_SD3	NC_000913.3	1883335	T	TG	coding	yeaV
Sample_SD3	NC_000913.3	1898421	GC	G	noncoding	-
Sample_SD3	NC_000913.3	2057669	A	ACC	noncoding	-
Sample_SD3	NC_000913.3	2288554	GC	G	noncoding	-
Sample_SD3	NC_000913.3	2388726	AT	A	coding	yfbO
Sample_SD3	NC_000913.3	3038501	GT	G	coding	dsbC
Sample_SD3	NC_000913.3	3903001	A	AG	coding	bglB
Sample_SD3	NC_000913.3	4041679	A	AG	coding	mobA
Sample_SD3	NC_000913.3	4410044	GT	G	noncoding	-
Sample_SD3	NC_000913.3	4488572	T	TC	coding	yjgR
Sample_SD3	NC_000913.3	4544059	A	AG	coding	fimI
Sample_SD4	NC_000913.3	272983	AG	A	noncoding	-
Sample_SD4	NC_000913.3	857285	T	TG	coding	ybiT
Sample_SD4	NC_000913.3	1212080	A	AC	noncoding	-
Sample_SD4	NC_000913.3	1426016	A	AG	noncoding	-
Sample_SD4	NC_000913.3	1519511	TG	T	coding	curA
Sample_SD4	NC_000913.3	1685536	GC	G	coding	fumC
Sample_SD4	NC_000913.3	1714317	CT	C	noncoding	-
Sample_SD4	NC_000913.3	1727488	C	CG	coding	nemA
Sample_SD4	NC_000913.3	2065741	GC	G	coding	cobU
Sample_SD4	NC_000913.3	2203424	A	AG	coding	yehI
Sample_SD4	NC_000913.3	2543750	CA	C	noncoding	-
Sample_SD4	NC_000913.3	2884087	T	TC	coding	casA
Sample_SD4	NC_000913.3	3216475	C	CG	coding	yqjH
Sample_SD4	NC_000913.3	3270201	G	GT	noncoding	-
Sample_SD4	NC_000913.3	3378782	GA	G	noncoding	-
Sample_SD4	NC_000913.3	3664961	GT	G	noncoding	-
Sample_SD4	NC_000913.3	3836528	GC	G	noncoding	-
Sample_SD4	NC_000913.3	4027233	TA	T	noncoding	-
Sample_SD4	NC_000913.3	4222797	GA	G	noncoding	-
Sample_SD4	NC_000913.3	4472190	GC	G	coding	pyrB
Sample_SD4	NC_000913.3	4488572	T	TCC	coding	yjgR
Sample_SD4	NC_000913.3	4606086	A	AG	noncoding	-
Sample_SD5	NC_000913.3	36912	CT	C	coding	caiC
Sample_SD5	NC_000913.3	321557	T	TG	noncoding	-
Sample_SD5	NC_000913.3	354910	A	AG	noncoding	-
Sample_SD5	NC_000913.3	401543	AG	A	coding	iraP
Sample_SD5	NC_000913.3	505834	G	GA	coding	ushA
Sample_SD5	NC_000913.3	600904	GA	G	coding	cusA
Sample_SD5	NC_000913.3	985401	G	GC	coding	aspC
Sample_SD5	NC_000913.3	1370035	GT	G	noncoding	-
Sample_SD5	NC_000913.3	1555700	T	TG	noncoding	-
Sample_SD5	NC_000913.3	1685536	GC	G	coding	fumC
Sample_SD5	NC_000913.3	1853278	C	CG	coding	ydjE
Sample_SD5	NC_000913.3	2185868	T	TG	noncoding	-
Sample_SD5	NC_000913.3	2653703	G	GT	noncoding	-
Sample_SD5	NC_000913.3	2734535	T	TC	coding	yfiH
Sample_SD5	NC_000913.3	2782652	CG	C	coding	ypjA
Sample_SD5	NC_000913.3	2783114	T	TC	noncoding	-
Sample_SD5	NC_000913.3	2877939	G	GC	noncoding	-
Sample_SD5	NC_000913.3	3114683	GC	G	coding	yghJ
Sample_SD5	NC_000913.3	3157706	G	GC	coding	yqhG
Sample_SD5	NC_000913.3	3369379	CT	C	coding	yhcH
Sample_SD5	NC_000913.3	3709555	GC	G	coding	eptB
Sample_SD5	NC_000913.3	3971586	GA	G	coding	wecC
Sample_SD5	NC_000913.3	4350290	AT	A	coding	dcuS
Sample_SD5	NC_000913.3	4609329	T	TC	noncoding	-
Sample_SD6	NC_000913.3	83572	T	TA	noncoding	-
Sample_SD6	NC_000913.3	1020244	GA	G	noncoding	-
Sample_SD6	NC_000913.3	1026806	A	AC	coding	mgsA
Sample_SD6	NC_000913.3	1168187	CT	C	noncoding	-
Sample_SD6	NC_000913.3	1198453	AATGAAATG	A	noncoding	-
Sample_SD6	NC_000913.3	1245856	G	GC	coding	treA
Sample_SD6	NC_000913.3	1506527	A	AG	coding	ydcN
Sample_SD6	NC_000913.3	1530465	CG	C	noncoding	-
Sample_SD6	NC_000913.3	2188952	G	GC	coding	yehB
Sample_SD6	NC_000913.3	2297107	T	TC	coding	ccmA
Sample_SD6	NC_000913.3	2862194	CA	C	coding	ygbJ
Sample_SD6	NC_000913.3	2900559	CT	C	noncoding	-
Sample_SD6	NC_000913.3	2947451	G	GC	noncoding	-
Sample_SD6	NC_000913.3	3195072	C	CG	noncoding	-
Sample_SD6	NC_000913.3	3544991	GC	G	coding	gntX
Sample_SD6	NC_000913.3	3817658	GT	G	noncoding	-
Sample_SD6	NC_000913.3	4370574	T	TC	noncoding	-
Sample_SD7	NC_000913.3	383591	TA	T	coding	yaiP
Sample_SD7	NC_000913.3	657541	GT	G	noncoding	-
Sample_SD7	NC_000913.3	721187	G	GC	coding	kdpE
Sample_SD7	NC_000913.3	1399978	T	TC	coding	ogt
Sample_SD7	NC_000913.3	1594124	G	GCC	noncoding	-
Sample_SD7	NC_000913.3	1624349	AT	A	coding	ydeI
Sample_SD7	NC_000913.3	1746557	TG	T	noncoding	-
Sample_SD7	NC_000913.3	1752448	AT	A	coding	ydhV
Sample_SD7	NC_000913.3	1806036	G	GC	coding	ydiY
Sample_SD7	NC_000913.3	2297107	T	TC	coding	ccmA
Sample_SD7	NC_000913.3	2408607	GA	G	coding	alaA
Sample_SD7	NC_000913.3	2541732	ACAG	A	coding	cysU
Sample_SD7	NC_000913.3	2644365	CG	C	noncoding	-
Sample_SD7	NC_000913.3	3215101	T	TC	coding	mug
Sample_SD7	NC_000913.3	3668538	GC	G	coding	yhjA
Sample_SD7	NC_000913.3	4060271	GT	G	noncoding	-
Sample_SD7	NC_000913.3	4439458	T	TA	noncoding	-
Sample_SD7	NC_000913.3	4556760	GT	G	noncoding	-
Sample_SD8	NC_000913.3	34111	GT	G	noncoding	-
Sample_SD8	NC_000913.3	289743	GC	G	coding	argF
Sample_SD8	NC_000913.3	685935	G	GC	coding	gltJ
Sample_SD8	NC_000913.3	1001015	GA	G	coding	elfC
Sample_SD8	NC_000913.3	1018968	C	CAA	noncoding	-
Sample_SD8	NC_000913.3	1026806	A	AC	coding	mgsA
Sample_SD8	NC_000913.3	1207935	T	TG	coding	stfP
Sample_SD8	NC_000913.3	1322626	A	AG	coding	trpE
Sample_SD8	NC_000913.3	1370035	GT	G	noncoding	-
Sample_SD8	NC_000913.3	1559379	GC	G	coding	ddpC
Sample_SD8	NC_000913.3	2227334	A	AC	noncoding	-
Sample_SD8	NC_000913.3	2554819	TG	T	coding	eutR
Sample_SD8	NC_000913.3	2824472	G	GC	noncoding	-
Sample_SD8	NC_000913.3	3101032	G	GCC	coding	yggN
Sample_SD8	NC_000913.3	3311389	GC	G	noncoding	-
Sample_SD8	NC_000913.3	3367430	CA	C	coding	yhcF
Sample_SD8	NC_000913.3	3664961	GT	G	noncoding	-
Sample_SD8	NC_000913.3	3696097	GA	G	coding	yhjR
Sample_SD8	NC_000913.3	4200170	T	TG	noncoding	-
Sample_SD8	NC_000913.3	4370560	AT	A	noncoding	-
Sample_SD8	NC_000913.3	4394883	C	CGG	coding	nnr
Sample_SD8	NC_000913.3	4446689	GA	G	coding	tamB
Sample_SD8	NC_000913.3	4532005	GA	G	noncoding	-
Sample_SD8	NC_000913.3	4589691	GT	G	coding	yjiY
Sample_SD9	NC_000913.3	77585	GT	G	noncoding	-
Sample_SD9	NC_000913.3	136449	GT	G	coding	speE
Sample_SD9	NC_000913.3	213975	CT	C	coding	yaeP
Sample_SD9	NC_000913.3	379942	A	AC	noncoding	-
Sample_SD9	NC_000913.3	401543	AG	A	coding	iraP
Sample_SD9	NC_000913.3	410892	T	TG	coding	mak
Sample_SD9	NC_000913.3	541345	CG	C	coding	ybbY
Sample_SD9	NC_000913.3	766951	CG	C	coding	mngA
Sample_SD9	NC_000913.3	845342	CT	C	coding	ybiO
Sample_SD9	NC_000913.3	868414	G	GC	coding	gsiA
Sample_SD9	NC_000913.3	1202223	TA	T	noncoding	-
Sample_SD9	NC_000913.3	1458619	T	TG	coding	paaG
Sample_SD9	NC_000913.3	1594124	G	GCC	noncoding	-
Sample_SD9	NC_000913.3	1597306	A	AC	noncoding	-
Sample_SD9	NC_000913.3	1685536	GC	G	coding	fumC
Sample_SD9	NC_000913.3	1724472	C	CGG	coding	sodC
Sample_SD9	NC_000913.3	1759675	GC	G	coding	sufS
Sample_SD9	NC_000913.3	1769471	T	TG	coding	ydiK
Sample_SD9	NC_000913.3	1892876	G	GC	coding	yoaA
Sample_SD9	NC_000913.3	2083612	CA	C	coding	sbcB
Sample_SD9	NC_000913.3	2087280	T	TG	noncoding	-
Sample_SD9	NC_000913.3	3003473	C	CG	coding	xdhB
Sample_SD9	NC_000913.3	3413846	G	GT	noncoding	-
Sample_SD9	NC_000913.3	3599882	CA	C	noncoding	-
Sample_SD9	NC_000913.3	3650673	T	TC	noncoding	-
Sample_SD9	NC_000913.3	3931176	A	AG	noncoding	-
Sample_SD9	NC_000913.3	4329888	T	TG	coding	yjcZ
Sample_SD9	NC_000913.3	4410044	GT	G	noncoding	-
Sample_SD9	NC_000913.3	4488572	T	TC	coding	yjgR
Sample_SD9	NC_000913.3	4502608	C	CG	coding	insG
Sample_SD9	NC_000913.3	4545040	AT	A	noncoding	-
Sample_SD9	NC_000913.3	4547299	CG	C	coding	fimD
Sample_SD10	NC_000913.3	77585	GT	G	noncoding	-
Sample_SD10	NC_000913.3	345110	AT	A	noncoding	-
Sample_SD10	NC_000913.3	412472	CT	C	coding	araJ
Sample_SD10	NC_000913.3	561690	T	TG	coding	sfmD
Sample_SD10	NC_000913.3	657541	GT	G	noncoding	-
Sample_SD10	NC_000913.3	899248	T	TG	coding	rlmC
Sample_SD10	NC_000913.3	1421631	TC	T	coding	ydaU
Sample_SD10	NC_000913.3	1421643	T	TC	coding	ydaU
Sample_SD10	NC_000913.3	1594124	G	GCCC	noncoding	-
Sample_SD10	NC_000913.3	1685536	GC	G	coding	fumC
Sample_SD10	NC_000913.3	1727488	C	CG	coding	nemA
Sample_SD10	NC_000913.3	1770469	CT	C	noncoding	-
Sample_SD10	NC_000913.3	1869016	GT	G	coding	yeaH
Sample_SD10	NC_000913.3	1938110	T	TC	coding	pykA
Sample_SD10	NC_000913.3	2001885	T	TG	noncoding	-
Sample_SD10	NC_000913.3	2491740	G	GT	coding	oxc
Sample_SD10	NC_000913.3	2646577	C	CG	coding	pbpC
Sample_SD10	NC_000913.3	2765787	GC	G	noncoding	-
Sample_SD10	NC_000913.3	2905213	G	GC	coding	queE
Sample_SD10	NC_000913.3	2934591	GT	G	coding	fucP
Sample_SD10	NC_000913.3	2934653	C	CT	coding	fucP
Sample_SD10	NC_000913.3	3385198	C	CG	noncoding	-
Sample_SD10	NC_000913.3	3385845	CT	C	noncoding	-
Sample_SD10	NC_000913.3	3902474	GC	G	coding	bglB
Sample_SD10	NC_000913.3	4017420	CA	C	coding	rmuC
Sample_SD10	NC_000913.3	4060837	TG	T	coding	yihL
Sample_SD10	NC_000913.3	4500977	A	AC	noncoding	-
Sample_SE1	NC_000913.3	705963	CT	C	noncoding	-
Sample_SE1	NC_000913.3	1004153	C	CG	coding	ycbF
Sample_SE1	NC_000913.3	1138170	A	AG	coding	flgJ
Sample_SE1	NC_000913.3	2057669	AC	A	noncoding	-
Sample_SE1	NC_000913.3	2582745	GA	G	coding	ypfG
Sample_SE1	NC_000913.3	3014967	T	TCC	coding	yqeC
Sample_SE1	NC_000913.3	3194356	T	TG	coding	yqiK
Sample_SE1	NC_000913.3	3511738	CA	C	coding	yhfZ
Sample_SE2	NC_000913.3	434608	G	GC	noncoding	-
Sample_SE2	NC_000913.3	469563	CA	C	coding	mdlA
Sample_SE2	NC_000913.3	848060	GA	G	noncoding	-
Sample_SE2	NC_000913.3	1157833	TA	T	noncoding	-
Sample_SE2	NC_000913.3	1322626	A	AG	coding	trpE
Sample_SE2	NC_000913.3	1479681	C	CG	coding	ynbC
Sample_SE2	NC_000913.3	1594788	GC	G	noncoding	-
Sample_SE2	NC_000913.3	1715177	G	GC	coding	pdxY
Sample_SE2	NC_000913.3	1772197	GT	G	coding	ydiM
Sample_SE2	NC_000913.3	1818543	G	GC	noncoding	-
Sample_SE2	NC_000913.3	1826925	GC	G	coding	astB
Sample_SE2	NC_000913.3	1927372	G	GC	coding	ptrB
Sample_SE2	NC_000913.3	2025598	G	GC	coding	yedP
Sample_SE2	NC_000913.3	2326628	G	GA	coding	atoB
Sample_SE2	NC_000913.3	2405150	TA	T	noncoding	-
Sample_SE2	NC_000913.3	2587502	TC	T	noncoding	-
Sample_SE2	NC_000913.3	2869641	T	TC	coding	umpG
Sample_SE2	NC_000913.3	2906684	CT	C	coding	eno
Sample_SE2	NC_000913.3	3060743	C	CA	noncoding	-
Sample_SE2	NC_000913.3	3240977	C	CG	coding	sstT
Sample_SE2	NC_000913.3	3574883	GT	G	noncoding	-
Sample_SE2	NC_000913.3	3579654	G	GC	noncoding	-
Sample_SE2	NC_000913.3	3622868	A	AG	coding	rhsB
Sample_SE2	NC_000913.3	3982676	T	TCC	noncoding	-
Sample_SE2	NC_000913.3	4436058	G	GT	coding	cpdB
Sample_SE2	NC_000913.3	4504864	AT	A	coding	yjhB
Sample_SE2	NC_000913.3	4523970	TC	T	coding	yjhG
Sample_SE3	NC_000913.3	403198	G	GT	noncoding	-
Sample_SE3	NC_000913.3	410892	T	TG	coding	mak
Sample_SE3	NC_000913.3	485339	TAG	T	coding	acrA
Sample_SE3	NC_000913.3	822508	A	AC	coding	clsB
Sample_SE3	NC_000913.3	1198453	AATGAAATG	A	noncoding	-
Sample_SE3	NC_000913.3	1202223	TA	T	noncoding	-
Sample_SE3	NC_000913.3	1254153	T	TC	coding	ycgV
Sample_SE3	NC_000913.3	1399978	T	TC	coding	ogt
Sample_SE3	NC_000913.3	1458619	T	TG	coding	paaG
Sample_SE3	NC_000913.3	1477896	TG	T	coding	ynbA
Sample_SE3	NC_000913.3	1594047	T	TC	noncoding	-
Sample_SE3	NC_000913.3	1606689	TG	T	coding	lsrF
Sample_SE3	NC_000913.3	1653535	A	AT	coding	rspB
Sample_SE3	NC_000913.3	1794368	T	TG	coding	btuC
Sample_SE3	NC_000913.3	1894322	GA	G	coding	yoaC
Sample_SE3	NC_000913.3	2185868	T	TG	noncoding	-
Sample_SE3	NC_000913.3	2269006	CT	C	coding	lpxT
Sample_SE3	NC_000913.3	2326960	G	GC	coding	atoB
Sample_SE3	NC_000913.3	2331657	G	GC	noncoding	-
Sample_SE3	NC_000913.3	2382816	TA	T	coding	elaD
Sample_SE3	NC_000913.3	2652849	T	TG	coding	sseA
Sample_SE3	NC_000913.3	2865777	CA	C	coding	ygbN
Sample_SE3	NC_000913.3	3367768	A	AC	noncoding	-
Sample_SE3	NC_000913.3	3378782	GA	G	noncoding	-
Sample_SE3	NC_000913.3	3563799	GA	G	noncoding	-
Sample_SE3	NC_000913.3	3892167	G	GC	coding	mdtL
Sample_SE3	NC_000913.3	4606086	A	AGG	noncoding	-
Sample_SE4	NC_000913.3	766951	C	CG	coding	mngA
Sample_SE4	NC_000913.3	858014	C	CG	coding	ybiU
Sample_SE4	NC_000913.3	1209990	CT	C	coding	pinE
Sample_SE4	NC_000913.3	1401239	TA	T	coding	abgT
Sample_SE4	NC_000913.3	1442731	GT	G	coding	ldhA
Sample_SE4	NC_000913.3	1594124	G	GCC	noncoding	-
Sample_SE4	NC_000913.3	1594248	T	TCC	noncoding	-
Sample_SE4	NC_000913.3	1616152	CA	C	coding	yneK
Sample_SE4	NC_000913.3	2196619	CA	C	noncoding	-
Sample_SE4	NC_000913.3	2506347	CAA	C	coding	ypdF
Sample_SE4	NC_000913.3	2644365	C	CG	noncoding	-
Sample_SE4	NC_000913.3	2734535	T	TC	coding	yfiH
Sample_SE4	NC_000913.3	2999673	A	AG	coding	ygeR
Sample_SE4	NC_000913.3	3456797	GC	G	coding	gspD
Sample_SE4	NC_000913.3	3915500	CA	C	noncoding	-
Sample_SE4	NC_000913.3	3931554	A	AG	coding	kup
Sample_SE4	NC_000913.3	4060271	GT	G	noncoding	-
Sample_SE4	NC_000913.3	4112861	CA	C	noncoding	-
Sample_SE4	NC_000913.3	4591185	T	TC	coding	yjiY
Sample_SE4	NC_000913.3	4609329	T	TC	noncoding	-
Sample_SE5	NC_000913.3	660420	CT	C	noncoding	-
Sample_SE5	NC_000913.3	751731	A	AG	coding	ybgQ
Sample_SE5	NC_000913.3	1135971	CG	C	coding	flgH
Sample_SE5	NC_000913.3	1585095	G	GC	coding	ydeP
Sample_SE5	NC_000913.3	1769471	T	TG	coding	ydiK
Sample_SE5	NC_000913.3	2018524	G	GC	coding	fliK
Sample_SE5	NC_000913.3	2326960	G	GC	coding	atoB
Sample_SE5	NC_000913.3	2483469	CA	C	noncoding	-
Sample_SE5	NC_000913.3	2986504	G	GA	coding	yqeG
Sample_SE5	NC_000913.3	3337095	T	TC	coding	mlaB
Sample_SE5	NC_000913.3	3709555	G	GC	coding	eptB
Sample_SE5	NC_000913.3	3847385	C	CA	coding	uhpC
Sample_SE5	NC_000913.3	3905630	CA	C	noncoding	-
Sample_SE5	NC_000913.3	3931176	A	AG	noncoding	-
Sample_SE5	NC_000913.3	4141209	GC	G	coding	frwA
Sample_SE5	NC_000913.3	4162051	T	TC	coding	yijD
Sample_SE5	NC_000913.3	4560800	GT	G	noncoding	-
Sample_SE6	NC_000913.3	868414	G	GCC	coding	gsiA
Sample_SE6	NC_000913.3	1409922	C	CA	coding	dbpA
Sample_SE6	NC_000913.3	1419714	T	TGG	noncoding	-
Sample_SE6	NC_000913.3	1655091	GA	G	coding	rspA
Sample_SE6	NC_000913.3	1799153	CA	C	noncoding	-
Sample_SE6	NC_000913.3	1831715	AT	A	coding	astC
Sample_SE6	NC_000913.3	1847718	G	GC	coding	selD
Sample_SE6	NC_000913.3	2411827	G	GC	coding	yfbT
Sample_SE6	NC_000913.3	2602010	G	GC	coding	hyfB
Sample_SE6	NC_000913.3	2900297	CA	C	noncoding	-
Sample_SE6	NC_000913.3	2994988	G	GC	noncoding	-
Sample_SE6	NC_000913.3	3117923	T	TC	coding	yghJ
Sample_SE6	NC_000913.3	3177460	T	TG	coding	nudF
Sample_SE6	NC_000913.3	3386807	GC	G	coding	aaeB
Sample_SE6	NC_000913.3	3650673	T	TC	noncoding	-
Sample_SE6	NC_000913.3	3668538	G	GC	coding	yhjA
Sample_SE6	NC_000913.3	3760126	AG	A	coding	selA
Sample_SE6	NC_000913.3	3779117	GA	G	coding	lldR
Sample_SE6	NC_000913.3	3905630	CA	C	noncoding	-
Sample_SE6	NC_000913.3	3950165	AT	A	noncoding	-
Sample_SE6	NC_000913.3	4269665	CA	C	coding	aphA
Sample_SE6	NC_000913.3	4389321	GC	G	coding	mscM
Sample_SE6	NC_000913.3	4606207	A	AG	noncoding	-
Sample_SE7	NC_000913.3	664555	CG	C	coding	rlpA
Sample_SE7	NC_000913.3	856812	TCG	T	coding	ybiT
Sample_SE7	NC_000913.3	1200990	AT	A	coding	xisE
Sample_SE7	NC_000913.3	1212080	A	ACC	noncoding	-
Sample_SE7	NC_000913.3	1727488	C	CG	coding	nemA
Sample_SE7	NC_000913.3	1871826	A	AG	coding	yeaI
Sample_SE7	NC_000913.3	2074356	G	GCC	coding	flu
Sample_SE7	NC_000913.3	2297107	T	TCC	coding	ccmA
Sample_SE7	NC_000913.3	2326919	A	AC	coding	atoB
Sample_SE7	NC_000913.3	2466793	GA	G	coding	intS
Sample_SE7	NC_000913.3	3928694	CT	C	coding	viaA
Sample_SE7	NC_000913.3	4580854	G	GC	coding	hsdS
Sample_SE7	NC_000913.3	4606322	A	AG	noncoding	-
Sample_SE8	NC_000913.3	523735	TG	T	coding	rhsD
Sample_SE8	NC_000913.3	546089	AT	A	coding	allD
Sample_SE8	NC_000913.3	573772	TG	T	coding	ylcG
Sample_SE8	NC_000913.3	1102871	TA	T	coding	csgD
Sample_SE8	NC_000913.3	1369801	A	AG	coding	pspE
Sample_SE8	NC_000913.3	1392753	GA	G	coding	pgrR
Sample_SE8	NC_000913.3	1670753	G	GC	coding	ynfM
Sample_SE8	NC_000913.3	1730367	GT	G	coding	lhr
Sample_SE8	NC_000913.3	1768125	G	GC	coding	ydiJ
Sample_SE8	NC_000913.3	1769471	T	TG	coding	ydiK
Sample_SE8	NC_000913.3	1789359	C	CA	coding	aroH
Sample_SE8	NC_000913.3	1950554	G	GC	noncoding	-
Sample_SE8	NC_000913.3	2154479	CA	C	coding	mdtA
Sample_SE8	NC_000913.3	2856058	TG	T	coding	fhlA
Sample_SE8	NC_000913.3	2999673	A	AG	coding	ygeR
Sample_SE8	NC_000913.3	3195212	A	AG	noncoding	-
Sample_SE8	NC_000913.3	3321050	GA	G	coding	yhbX
Sample_SE8	NC_000913.3	3677644	AT	A	coding	yhjG
Sample_SE8	NC_000913.3	4060271	GT	G	noncoding	-
Sample_SE9	NC_000913.3	473807	T	TG	coding	amtB
Sample_SE9	NC_000913.3	985838	TA	T	noncoding	-
Sample_SE9	NC_000913.3	1004153	C	CG	coding	ycbF
Sample_SE9	NC_000913.3	1089440	CG	C	coding	pgaB
Sample_SE9	NC_000913.3	1245065	G	GA	noncoding	-
Sample_SE9	NC_000913.3	1245856	G	GC	coding	treA
Sample_SE9	NC_000913.3	1769513	GCAC	G	coding	ydiK
Sample_SE9	NC_000913.3	2100868	GC	G	coding	gnd
Sample_SE9	NC_000913.3	2502671	GC	G	coding	fryA
Sample_SE9	NC_000913.3	3160278	GT	G	coding	ygiQ
Sample_SE9	NC_000913.3	3232010	A	AG	coding	fadH
Sample_SE9	NC_000913.3	3253876	GA	G	coding	yhaJ
Sample_SE9	NC_000913.3	3350177	A	AC	coding	elbB
Sample_SE9	NC_000913.3	3354833	G	GC	coding	gltB
Sample_SE9	NC_000913.3	3549786	GC	G	coding	malQ
Sample_SE9	NC_000913.3	3702448	CT	C	coding	dppF
Sample_SE9	NC_000913.3	4269244	CA	C	noncoding	-
Sample_SF1	NC_000913.3	301	CT	C	noncoding	-
Sample_SF1	NC_000913.3	160858	A	AC	coding	sfsA
Sample_SF1	NC_000913.3	312184	A	AG	coding	ykgL
Sample_SF1	NC_000913.3	323070	GC	G	coding	ykgF
Sample_SF1	NC_000913.3	383591	TA	T	coding	yaiP
Sample_SF1	NC_000913.3	385124	G	GT	noncoding	-
Sample_SF1	NC_000913.3	441365	AT	A	noncoding	-
Sample_SF1	NC_000913.3	472736	C	CG	coding	glnK
Sample_SF1	NC_000913.3	561690	T	TGG	coding	sfmD
Sample_SF1	NC_000913.3	685935	G	GC	coding	gltJ
Sample_SF1	NC_000913.3	866895	G	GC	coding	iaaA
Sample_SF1	NC_000913.3	868414	GC	G	coding	gsiA
Sample_SF1	NC_000913.3	925892	A	AGG	noncoding
Sample_SF1	NC_000913.3	954806	TA	T	noncoding	-
Sample_SF1	NC_000913.3	1004153	C	CG	coding	ycbF
Sample_SF1	NC_000913.3	1421631	T	TCC	coding	ydaU
Sample_SF1	NC_000913.3	1629448	C	CT	noncoding	-
Sample_SF1	NC_000913.3	1647216	CG	C	noncoding	-
Sample_SF1	NC_000913.3	1709408	TC	T	coding	rsxD
Sample_SF1	NC_000913.3	1806036	G	GC	coding	ydiY
Sample_SF1	NC_000913.3	2033731	CT	C	noncoding	-
Sample_SF1	NC_000913.3	2297107	T	TCC	coding	ccmA
Sample_SF1	NC_000913.3	2563089	T	TC	coding	yffP
Sample_SF1	NC_000913.3	2628806	GA	G	coding	yfgF
Sample_SF1	NC_000913.3	2762642	T	TC	coding	yfjK
Sample_SF1	NC_000913.3	2776104	C	CG	coding	yfjX
Sample_SF1	NC_000913.3	3102334	G	GC	coding	trmI
Sample_SF1	NC_000913.3	3114683	G	GC	coding	yghJ
Sample_SF1	NC_000913.3	3732145	C	CG	noncoding	-
Sample_SF1	NC_000913.3	3811203	CA	C	noncoding	-
Sample_SF1	NC_000913.3	3852908	GACC	G	coding	ivbL
Sample_SF1	NC_000913.3	3906483	GC	G	coding	bglG
Sample_SF1	NC_000913.3	3931554	A	AG	coding	kup
Sample_SF1	NC_000913.3	4060271	GT	G	noncoding	-
Sample_SF2	NC_000913.3	561690	T	TG	coding	sfmD
Sample_SF3	NC_000913.3	1147	A	AC	coding	thrA
Sample_SF3	NC_000913.3	9165	GA	G	coding	talB
Sample_SF3	NC_000913.3	85812	GGC	G	coding	ilvI
Sample_SF3	NC_000913.3	107544	GT	G	noncoding	-
Sample_SF3	NC_000913.3	160858	A	AC	coding	sfsA
Sample_SF3	NC_000913.3	297779	C	CG	coding	paoD
Sample_SF3	NC_000913.3	303087	T	TG	coding	yagU
Sample_SF3	NC_000913.3	321557	T	TG	noncoding	-
Sample_SF3	NC_000913.3	489906	A	AG	noncoding	-
Sample_SF3	NC_000913.3	520760	T	TC	coding	ybbP
Sample_SF3	NC_000913.3	729670	G	GC	coding	rhsC
Sample_SF3	NC_000913.3	746571	CG	C	coding	nei
Sample_SF3	NC_000913.3	954806	TA	T	noncoding	-
Sample_SF3	NC_000913.3	1001015	GA	G	coding	elfC
Sample_SF3	NC_000913.3	1068167	C	CG	coding	ymdF
Sample_SF3	NC_000913.3	1093352	T	TG	coding	ycdT
Sample_SF3	NC_000913.3	1392753	GA	G	coding	pgrR
Sample_SF3	NC_000913.3	1419714	TG	T	noncoding	-
Sample_SF3	NC_000913.3	1439084	GA	G	coding	pfo
Sample_SF3	NC_000913.3	1508216	CG	C	coding	ydcP
Sample_SF3	NC_000913.3	1685536	GC	G	coding	fumC
Sample_SF3	NC_000913.3	1727488	C	CG	coding	nemA
Sample_SF3	NC_000913.3	1818543	G	GCC	noncoding	-
Sample_SF3	NC_000913.3	1851889	G	GC	coding	pncA
Sample_SF3	NC_000913.3	1879354	GT	G	noncoding	-
Sample_SF3	NC_000913.3	2383019	T	TCC	coding	elaD
Sample_SF3	NC_000913.3	2494925	G	GC	coding	ypdI
Sample_SF3	NC_000913.3	2602010	G	GC	coding	hyfB
Sample_SF3	NC_000913.3	2638020	G	GCC	coding	bamB
Sample_SF3	NC_000913.3	2809767	GT	G	coding	ygaZ
Sample_SF3	NC_000913.3	2817866	GA	G	noncoding	-
Sample_SF3	NC_000913.3	3109200	GA	G	noncoding	-
Sample_SF3	NC_000913.3	3185113	CT	C	coding	yqiC
Sample_SF3	NC_000913.3	3221430	TG	T	noncoding	-
Sample_SF3	NC_000913.3	3253196	G	GTT	coding	yhaI
Sample_SF3	NC_000913.3	3352820	GC	G	coding	arcB
Sample_SF3	NC_000913.3	3377755	TA	T	noncoding	-
Sample_SF3	NC_000913.3	3760126	A	AG	coding	selA
Sample_SF3	NC_000913.3	3793704	TA	T	noncoding	-
Sample_SF3	NC_000913.3	4060271	GT	G	noncoding	-
Sample_SF3	NC_000913.3	4408969	GA	G	coding	rnr
Sample_SF3	NC_000913.3	4410044	GT	G	noncoding	-
Sample_SF3	NC_000913.3	4500977	A	AC	noncoding	-
Sample_SF3	NC_000913.3	4556760	GT	G	noncoding	-
Sample_SF3	NC_000913.3	4571915	AG	A	noncoding	-
Sample_SF6	NC_000913.3	167646	TG	T	coding	fhuA
Sample_SF6	NC_000913.3	311699	TA	T	noncoding	-
Sample_SF6	NC_000913.3	391697	T	TG	noncoding	-
Sample_SF6	NC_000913.3	1002217	A	AG	coding	elfG
Sample_SF6	NC_000913.3	1020052	A	AT	coding	ompA
Sample_SF6	NC_000913.3	1083481	CA	C	coding	efeB
Sample_SF6	NC_000913.3	1248623	G	GT	coding	dhaM
Sample_SF6	NC_000913.3	1273437	GT	G	coding	ychN
Sample_SF6	NC_000913.3	1447970	AG	A	coding	feaB
Sample_SF6	NC_000913.3	1458795	T	TG	coding	paaG
Sample_SF6	NC_000913.3	1594124	G	GCC	noncoding	-
Sample_SF6	NC_000913.3	1594248	T	TC	noncoding	-
Sample_SF6	NC_000913.3	1632353	A	AT	noncoding	-
Sample_SF6	NC_000913.3	1951047	GC	G	coding	yecD
Sample_SF6	NC_000913.3	2074356	GC	G	coding	flu
Sample_SF6	NC_000913.3	2288554	GC	G	noncoding	-
Sample_SF6	NC_000913.3	2808147	G	GT	noncoding	-
Sample_SF6	NC_000913.3	2830024	C	CT	coding	srlQ
Sample_SF6	NC_000913.3	3014967	T	TC	coding	yqeC
Sample_SF6	NC_000913.3	3157706	G	GC	coding	yqhG
Sample_SF6	NC_000913.3	3194356	T	TG	coding	yqiK
Sample_SF6	NC_000913.3	3496899	G	GCC	noncoding	-
Sample_SF6	NC_000913.3	3770230	T	TC	noncoding	-
Sample_SF6	NC_000913.3	3836528	G	GC	noncoding	-
Sample_SF6	NC_000913.3	4424449	C	CA	noncoding	-
Sample_SF6	NC_000913.3	4459309	T	TA	coding	pmbA
Sample_SF7	NC_000913.3	136449	GT	G	coding	speE
Sample_SF7	NC_000913.3	379942	AC	A	noncoding	-
Sample_SF7	NC_000913.3	513139	GC	G	coding	ybaT
Sample_SF7	NC_000913.3	752956	AG	A	noncoding	-
Sample_SF7	NC_000913.3	829813	G	GC	coding	ybhG
Sample_SF7	NC_000913.3	987000	GT	G	noncoding	-
Sample_SF7	NC_000913.3	1001015	GA	G	coding	elfC
Sample_SF7	NC_000913.3	1026806	A	AC	coding	mgsA
Sample_SF7	NC_000913.3	1157833	TA	T	noncoding	-
Sample_SF7	NC_000913.3	1485551	G	GA	coding	hrpA
Sample_SF7	NC_000913.3	1768435	C	CG	coding	ydiJ
Sample_SF7	NC_000913.3	1779483	AT	A	noncoding	-
Sample_SF7	NC_000913.3	1808230	G	GT	coding	yniA
Sample_SF7	NC_000913.3	1855749	G	GT	coding	ydjG
Sample_SF7	NC_000913.3	1911317	CT	C	coding	yebQ
Sample_SF7	NC_000913.3	1927235	GC	G	coding	ptrB
Sample_SF7	NC_000913.3	2087280	T	TG	noncoding	-
Sample_SF7	NC_000913.3	2288554	GC	G	noncoding	-
Sample_SF7	NC_000913.3	2825078	G	GC	coding	mltB
Sample_SF7	NC_000913.3	3003479	GA	G	coding	xdhB
Sample_SF7	NC_000913.3	3017108	T	TTC	coding	ygfK
Sample_SF7	NC_000913.3	3112277	G	GC	noncoding	-
Sample_SF7	NC_000913.3	3195072	CG	C	noncoding	-
Sample_SF7	NC_000913.3	3513888	G	GT	coding	gph
Sample_SF7	NC_000913.3	3576468	A	AC	coding	gntU
Sample_SF7	NC_000913.3	3728110	TC	T	coding	xylB
Sample_SF7	NC_000913.3	3767031	TA	T	coding	yibA
Sample_SF7	NC_000913.3	3928449	T	TA	coding	viaA
Sample_SF7	NC_000913.3	3931176	A	AG	noncoding	-
Sample_SF7	NC_000913.3	3948799	C	CG	coding	yifB
Sample_SF7	NC_000913.3	4133914	CG	C	coding	katG
Sample_SF7	NC_000913.3	4492577	AG	A	noncoding	-
Sample_SF9	NC_000913.3	77585	GT	G	noncoding	-
Sample_SF9	NC_000913.3	80871	A	AC	coding	leuB
Sample_SF9	NC_000913.3	107544	GT	G	noncoding	-
Sample_SF9	NC_000913.3	282106	GC	G	noncoding	-
Sample_SF9	NC_000913.3	308267	GC	G	coding	ecpC
Sample_SF9	NC_000913.3	358393	T	TG	coding	cynR
Sample_SF9	NC_000913.3	369967	T	TG	coding	mhpA
Sample_SF9	NC_000913.3	456489	CT	C	noncoding	-
Sample_SF9	NC_000913.3	746571	CG	C	coding	nei
Sample_SF9	NC_000913.3	766951	C	CG	coding	mngA
Sample_SF9	NC_000913.3	822997	A	AC	coding	clsB
Sample_SF9	NC_000913.3	854218	C	CG	coding	ybiR
Sample_SF9	NC_000913.3	1093352	T	TG	coding	ycdT
Sample_SF9	NC_000913.3	1171143	GC	G	coding	mfd
Sample_SF9	NC_000913.3	1210436	TG	T	coding	mcrA
Sample_SF9	NC_000913.3	1370035	GT	G	noncoding	-
Sample_SF9	NC_000913.3	1421643	T	TC	coding	ydaU
Sample_SF9	NC_000913.3	1515052	C	CA	coding	ydcV
Sample_SF9	NC_000913.3	1585095	G	GC	coding	ydeP
Sample_SF9	NC_000913.3	1594124	G	GCC	noncoding	-
Sample_SF9	NC_000913.3	1596767	TC	T	noncoding	-
Sample_SF9	NC_000913.3	1769471	T	TG	coding	ydiK
Sample_SF9	NC_000913.3	1958440	TA	T	noncoding	-
Sample_SF9	NC_000913.3	1972735	A	AG	noncoding	-
Sample_SF9	NC_000913.3	2063099	C	CA	coding	ldtA
Sample_SF9	NC_000913.3	2185868	T	TGG	noncoding	-
Sample_SF9	NC_000913.3	2227334	AC	A	noncoding	-
Sample_SF9	NC_000913.3	2519128	GA	G	coding	yfeD
Sample_SF9	NC_000913.3	2540007	G	GC	coding	cysA
Sample_SF9	NC_000913.3	2737536	G	GT	noncoding	-
Sample_SF9	NC_000913.3	2767500	T	TC	noncoding	-
Sample_SF9	NC_000913.3	2769642	G	GC	noncoding	-
Sample_SF9	NC_000913.3	2877939	GC	G	noncoding	-
Sample_SF9	NC_000913.3	2976101	GA	G	noncoding	-
Sample_SF9	NC_000913.3	2999673	A	AGG	coding	ygeR
Sample_SF9	NC_000913.3	3003473	C	CG	coding	xdhB
Sample_SF9	NC_000913.3	3003479	GA	G	coding	xdhB
Sample_SF9	NC_000913.3	3651657	G	GA	noncoding	-
Sample_SF9	NC_000913.3	3688251	G	GC	coding	bcsC
Sample_SF9	NC_000913.3	3770230	T	TC	noncoding	-
Sample_SF9	NC_000913.3	4074912	GA	G	coding	yihW
Sample_SF9	NC_000913.3	4270431	GT	G	coding	yjbQ
Sample_SF9	NC_000913.3	4293099	T	TGGG	coding	nrfE
Sample_SF9	NC_000913.3	4314316	AG	A	noncoding	-
Sample_SF9	NC_000913.3	4416588	CG	C	coding	bsmA
Sample_SF9	NC_000913.3	4545169	GT	G	coding	fimD
Sample_SF9	NC_000913.3	4616944	TA	T	coding	yjjI
Sample_SG1	NC_000913.3	379915	A	AG	noncoding	-
Sample_SG1	NC_000913.3	564403	G	GT	coding	sfmZ
Sample_SG1	NC_000913.3	632010	A	AG	noncoding	-
Sample_SG1	NC_000913.3	723520	GT	G	coding	kdpD
Sample_SG1	NC_000913.3	868414	GC	G	coding	gsiA
Sample_SG1	NC_000913.3	915312	T	TA	noncoding	-
Sample_SG1	NC_000913.3	987000	GT	G	noncoding	-
Sample_SG1	NC_000913.3	1089440	CG	C	coding	pgaB
Sample_SG1	NC_000913.3	1170488	T	TG	noncoding	-
Sample_SG1	NC_000913.3	1202223	TA	T	noncoding	-
Sample_SG1	NC_000913.3	1294502	C	CG	noncoding	-
Sample_SG1	NC_000913.3	1370035	GT	G	noncoding	-
Sample_SG1	NC_000913.3	1421643	T	TCC	coding	ydaU
Sample_SG1	NC_000913.3	1902866	TA	T	coding	manX
Sample_SG1	NC_000913.3	1927235	G	GCC	coding	ptrB
Sample_SG1	NC_000913.3	2125556	G	GC	coding	wcaI
Sample_SG1	NC_000913.3	2227334	A	AC	noncoding	-
Sample_SG1	NC_000913.3	2288554	GC	G	noncoding	-
Sample_SG1	NC_000913.3	2328328	TA	T	coding	yfaQ
Sample_SG1	NC_000913.3	2372841	T	TG	coding	arnE
Sample_SG1	NC_000913.3	2695578	A	AG	noncoding	-
Sample_SG1	NC_000913.3	2743271	TG	T	coding	yfiN
Sample_SG1	NC_000913.3	2816584	CA	C	coding	yqaA
Sample_SG1	NC_000913.3	2865047	T	TC	noncoding	-
Sample_SG1	NC_000913.3	2972903	G	GC	coding	lplT
Sample_SG1	NC_000913.3	3045986	T	TC	noncoding	-
Sample_SG1	NC_000913.3	3120150	A	AG	coding	glcA
Sample_SG1	NC_000913.3	3739009	TG	T	coding	malS
Sample_SG1	NC_000913.3	3905556	GC	G	coding	bglF
Sample_SG1	NC_000913.3	3994304	CAACA	C	noncoding	-
Sample_SG1	NC_000913.3	4312353	C	CT	coding	alsR
Sample_SG3	NC_000913.3	251009	C	CGG	coding	dinB
Sample_SG3	NC_000913.3	308047	G	GCCCC	coding	ecpC
Sample_SG3	NC_000913.3	371929	A	AC	coding	mhpC
Sample_SG3	NC_000913.3	528166	A	AG	noncoding	-
Sample_SG3	NC_000913.3	856812	TCG	T	coding	ybiT
Sample_SG3	NC_000913.3	1096953	CG	C	noncoding	-
Sample_SG3	NC_000913.3	1135567	CA	C	coding	flgH
Sample_SG3	NC_000913.3	1318565	G	GC	coding	trpC
Sample_SG3	NC_000913.3	1337387	CA	C	coding	acnA
Sample_SG3	NC_000913.3	1477874	T	TG	coding	ynbA
Sample_SG3	NC_000913.3	1566788	AT	A	coding	dosC
Sample_SG3	NC_000913.3	1636350	CT	C	noncoding	-
Sample_SG3	NC_000913.3	1685536	G	GC	coding	fumC
Sample_SG3	NC_000913.3	2065816	T	TC	noncoding	-
Sample_SG3	NC_000913.3	2754776	TA	T	noncoding	-
Sample_SG3	NC_000913.3	2778924	G	GC	coding	ypjA
Sample_SG3	NC_000913.3	2905213	GC	G	coding	queE
Sample_SG3	NC_000913.3	3432988	G	GC	coding	smf
Sample_SG3	NC_000913.3	3580921	CA	C	noncoding	-
Sample_SG3	NC_000913.3	3609130	AG	A	noncoding	-
Sample_SG3	NC_000913.3	4357117	CT	C	coding	cadA
Sample_SG3	NC_000913.3	4410044	GT	G	noncoding	-
Sample_SG4	NC_000913.3	111224	A	AC	coding	mutT
Sample_SG4	NC_000913.3	160858	A	AC	coding	sfsA
Sample_SG4	NC_000913.3	411129	C	CCG	noncoding	-
Sample_SG4	NC_000913.3	562667	T	TC	coding	sfmH
Sample_SG4	NC_000913.3	632010	A	AG	noncoding	-
Sample_SG4	NC_000913.3	705963	CT	C	noncoding	-
Sample_SG4	NC_000913.3	723520	GT	G	coding	kdpD
Sample_SG4	NC_000913.3	1004153	C	CG	coding	ycbF
Sample_SG4	NC_000913.3	1119357	G	GA	coding	yceO
Sample_SG4	NC_000913.3	1233302	GC	G	coding	nhaB
Sample_SG4	NC_000913.3	1792493	CG	C	coding	nlpC
Sample_SG4	NC_000913.3	1852859	TA	T	coding	ydjE
Sample_SG4	NC_000913.3	2288554	GC	G	noncoding	-
Sample_SG4	NC_000913.3	2326919	A	AC	coding	atoB
Sample_SG4	NC_000913.3	2757654	CT	C	coding	yfjH
Sample_SG4	NC_000913.3	2759327	GA	G	coding	yfjI
Sample_SG4	NC_000913.3	2767438	A	AC	noncoding	-
Sample_SG4	NC_000913.3	2816584	CA	C	coding	yqaA
Sample_SG4	NC_000913.3	2826462	GA	G	coding	srlE
Sample_SG4	NC_000913.3	3014963	GT	G	coding	yqeC
Sample_SG4	NC_000913.3	3110505	G	GA	noncoding	-
Sample_SG4	NC_000913.3	3375889	AG	A	coding	dcuD
Sample_SG4	NC_000913.3	3804992	A	AT	coding	waaS
Sample_SG4	NC_000913.3	4101721	C	CG	coding	kdgT
Sample_SG4	NC_000913.3	4200170	T	TG	noncoding	-
Sample_SG4	NC_000913.3	4410044	GT	G	noncoding	-
Sample_SG5	NC_000913.3	46224	CG	C	coding	yaaU
Sample_SG5	NC_000913.3	244290	CG	C	noncoding	-
Sample_SG5	NC_000913.3	295976	AT	A	coding	intF
Sample_SG5	NC_000913.3	303087	T	TG	coding	yagU
Sample_SG5	NC_000913.3	456489	CT	C	noncoding	-
Sample_SG5	NC_000913.3	925892	A	AG	noncoding	-
Sample_SG5	NC_000913.3	1198453	AATGAAATG	A	noncoding	-
Sample_SG5	NC_000913.3	1254153	T	TC	coding	ycgV
Sample_SG5	NC_000913.3	1426016	A	AG	noncoding	-
Sample_SG5	NC_000913.3	1714317	CT	C	noncoding	-
Sample_SG5	NC_000913.3	2104873	GA	G	coding	wbbJ
Sample_SG5	NC_000913.3	2133575	A	AC	coding	wzc
Sample_SG5	NC_000913.3	2614614	T	TC	coding	focB
Sample_SG5	NC_000913.3	2971690	G	GC	coding	tas
Sample_SG5	NC_000913.3	3001297	C	CG	coding	xdhA
Sample_SG5	NC_000913.3	3240977	C	CG	coding	sstT
Sample_SG5	NC_000913.3	3267246	CA	C	noncoding	-
Sample_SG5	NC_000913.3	3931554	A	AG	coding	kup
Sample_SG5	NC_000913.3	4410044	GT	G	noncoding	-
Sample_SG5	NC_000913.3	4448468	T	TG	coding	chpS
Sample_SG5	NC_000913.3	4627216	G	GA	coding	radA
Sample_SG7	NC_000913.3	169972	A	AG	coding	fhuC
Sample_SG7	NC_000913.3	294688	GT	G	coding	yagM
Sample_SG7	NC_000913.3	310051	A	AG	noncoding	-
Sample_SG7	NC_000913.3	868414	GC	G	coding	gsiA
Sample_SG7	NC_000913.3	925892	A	AG	noncoding	-
Sample_SG7	NC_000913.3	1315897	CT	C	coding	ycnoncoding
Sample_SG7	NC_000913.3	1661802	T	TG	coding	ynfF
Sample_SG7	NC_000913.3	1757268	AT	A	noncoding	-
Sample_SG7	NC_000913.3	1807500	G	GT	coding	ydiZ
Sample_SG7	NC_000913.3	1908009	C	CA	noncoding	-
Sample_SG7	NC_000913.3	1972735	A	AG	noncoding	-
Sample_SG7	NC_000913.3	2113621	A	ATACGTCCCCATGCACCAGGCTGAG	coding	wcaN
Sample_SG7	NC_000913.3	2297107	T	TCC	coding	ccmA
Sample_SG7	NC_000913.3	2326960	G	GC	coding	atoB
Sample_SG7	NC_000913.3	2335221	GT	G	coding	yfaA
Sample_SG7	NC_000913.3	2695578	A	AG	noncoding	-
Sample_SG7	NC_000913.3	2783618	TA	T	noncoding	-
Sample_SG7	NC_000913.3	2809767	GT	G	coding	ygaZ
Sample_SG7	NC_000913.3	3157706	GC	G	coding	yqhG
Sample_SG7	NC_000913.3	3332674	GC	G	coding	yhbE
Sample_SG7	NC_000913.3	3333574	GA	G	noncoding	-
Sample_SG7	NC_000913.3	3465678	CA	C	coding	gspO
Sample_SG7	NC_000913.3	3668538	GC	G	coding	yhjA
Sample_SG7	NC_000913.3	4066412	C	CT	coding	yihP
Sample_SG7	NC_000913.3	4410044	GT	G	noncoding	-
Sample_SG7	NC_000913.3	4517087	CG	C	coding	fecR
Sample_SG7	NC_000913.3	4568504	T	TA	coding	mdtM
Sample_SG7	NC_000913.3	4633787	GA	G	noncoding	-
Sample_SG8	NC_000913.3	107571	T	TA	noncoding	-
Sample_SG8	NC_000913.3	311472	GT	G	noncoding	-
Sample_SG8	NC_000913.3	632010	A	AG	noncoding	-
Sample_SG8	NC_000913.3	723520	GT	G	coding	kdpD
Sample_SG8	NC_000913.3	868414	GC	G	coding	gsiA
Sample_SG8	NC_000913.3	925892	A	AG	noncoding	-
Sample_SG8	NC_000913.3	1020126	C	CG	noncoding	-
Sample_SG8	NC_000913.3	1029731	GA	G	coding	rlmI
Sample_SG8	NC_000913.3	1053510	AG	A	coding	torS
Sample_SG8	NC_000913.3	1367662	GC	G	coding	pspF
Sample_SG8	NC_000913.3	1421643	T	TC	coding	ydaU
Sample_SG8	NC_000913.3	1714317	CT	C	noncoding	-
Sample_SG8	NC_000913.3	2297107	T	TCC	coding	ccmA
Sample_SG8	NC_000913.3	2602010	G	GCC	coding	hyfB
Sample_SG8	NC_000913.3	2689957	GC	G	coding	glrK
Sample_SG8	NC_000913.3	2767438	A	AC	noncoding	-
Sample_SG8	NC_000913.3	2769642	G	GC	noncoding	-
Sample_SG8	NC_000913.3	2900297	CA	C	noncoding	-
Sample_SG8	NC_000913.3	3123348	G	GC	coding	glcB
Sample_SG8	NC_000913.3	3271536	T	TC	coding	garK
Sample_SG8	NC_000913.3	3292552	C	CTT	coding	rsmI
Sample_SG8	NC_000913.3	3649766	G	GC	coding	arsB
Sample_SG8	NC_000913.3	3980951	TG	T	coding	yifK
Sample_SG8	NC_000913.3	4106379	GT	G	noncoding	-
Sample_SG8	NC_000913.3	4241329	GC	G	coding	xylE
Sample_SG8	NC_000913.3	4293099	T	TG	coding	nrfE
Sample_SG9	NC_000913.3	34111	GT	G	noncoding	-
Sample_SG9	NC_000913.3	347701	GT	G	coding	prpR
Sample_SG9	NC_000913.3	526810	TG	T	coding	rhsD
Sample_SG9	NC_000913.3	657541	GT	G	noncoding	-
Sample_SG9	NC_000913.3	723520	GT	G	coding	kdpD
Sample_SG9	NC_000913.3	724345	T	TC	coding	kdpD
Sample_SG9	NC_000913.3	868414	GC	G	coding	gsiA
Sample_SG9	NC_000913.3	899248	T	TG	coding	rlmC
Sample_SG9	NC_000913.3	925892	A	AG	noncoding	-
Sample_SG9	NC_000913.3	1051912	AT	A	coding	ymcE
Sample_SG9	NC_000913.3	1091752	GC	G	coding	pgaA
Sample_SG9	NC_000913.3	1208044	G	GA	coding	stfP
Sample_SG9	NC_000913.3	1417538	CT	C	coding	racC
Sample_SG9	NC_000913.3	1479681	C	CG	coding	ynbC
Sample_SG9	NC_000913.3	1559424	TA	T	coding	ddpC
Sample_SG9	NC_000913.3	1585095	GC	G	coding	ydeP
Sample_SG9	NC_000913.3	1594124	GC	GCCC	noncoding	-
Sample_SG9	NC_000913.3	1622816	GA	G	noncoding	-
Sample_SG9	NC_000913.3	1727067	GA	G	coding	nemA
Sample_SG9	NC_000913.3	1768259	C	CA	coding	ydiJ
Sample_SG9	NC_000913.3	1888015	CA	C	noncoding	-
Sample_SG9	NC_000913.3	1927235	G	GCC	coding	ptrB
Sample_SG9	NC_000913.3	1978434	A	AG	noncoding	-
Sample_SG9	NC_000913.3	2018252	GA	G	coding	fliJ
Sample_SG9	NC_000913.3	2065741	GC	G	coding	cobU
Sample_SG9	NC_000913.3	2288554	GC	G	noncoding	-
Sample_SG9	NC_000913.3	2389556	TA	T	coding	yfbP
Sample_SG9	NC_000913.3	2538513	TA	T	noncoding	-
Sample_SG9	NC_000913.3	2652849	T	TG	coding	sseA
Sample_SG9	NC_000913.3	2981896	GC	G	coding	araE
Sample_SG9	NC_000913.3	3102334	G	GC	coding	trmI
Sample_SG9	NC_000913.3	3189387	GT	G	noncoding	-
Sample_SG9	NC_000913.3	3304806	GC	G	coding	mtr
Sample_SG9	NC_000913.3	3332256	T	TC	coding	yhbE
Sample_SG9	NC_000913.3	3421755	G	GT	coding	yhdY
Sample_SG9	NC_000913.3	3622868	A	AG	coding	rhsB
Sample_SG9	NC_000913.3	4060837	TG	T	coding	yihL
Sample_SG9	NC_000913.3	4066745	G	GT	coding	yihP
Sample_SG9	NC_000913.3	4192043	G	GC	coding	thnoncoding
Sample_SG9	NC_000913.3	4291502	C	CG	noncoding	-
Sample_SG9	NC_000913.3	4410044	GT	G	noncoding	-
Sample_SG9	NC_000913.3	4606086	A	AGGG	noncoding	-
Sample_SG9	NC_000913.3	4609329	T	TCC	noncoding	-
Sample_SH1	NC_000913.3	34111	GT	G	noncoding	-
Sample_SH1	NC_000913.3	244290	C	CG	noncoding	-
Sample_SH1	NC_000913.3	308267	GC	G	coding	ecpC
Sample_SH1	NC_000913.3	513139	G	GC	coding	ybaT
Sample_SH1	NC_000913.3	1157579	GT	G	noncoding	-
Sample_SH1	NC_000913.3	1198453	A	AATGAAATG	noncoding	-
Sample_SH1	NC_000913.3	1478605	A	AC	coding	ynbB
Sample_SH1	NC_000913.3	1565685	CG	C	coding	dosP
Sample_SH1	NC_000913.3	1685536	GC	G	coding	fumC
Sample_SH1	NC_000913.3	1746874	G	GA	coding	ydhR
Sample_SH1	NC_000913.3	2165567	G	GC	noncoding	-
Sample_SH1	NC_000913.3	2530198	A	AC	noncoding	-
Sample_SH1	NC_000913.3	2773408	AT	A	coding	yfjW
Sample_SH1	NC_000913.3	2905213	G	GC	coding	queE
Sample_SH1	NC_000913.3	2940979	T	TG	coding	rlmM
Sample_SH1	NC_000913.3	3580921	CA	C	noncoding	-
Sample_SH1	NC_000913.3	3923770	G	GT	coding	mnmG
Sample_SH1	NC_000913.3	3953738	CG	C	coding	ilvD
Sample_SH1	NC_000913.3	3955318	T	TG	coding	ilvD
Sample_SH1	NC_000913.3	4014343	A	AT	coding	metE
Sample_SH2	NC_000913.3	793595	GA	G	coding	modF
Sample_SH2	NC_000913.3	1370035	GT	G	noncoding	-
Sample_SH2	NC_000913.3	1420787	A	AG	coding	ydaT
Sample_SH8	NC_000913.3	34818	CG	C	coding	caiE
Sample_SH8	NC_000913.3	215133	GA	G	coding	arfB
Sample_SH8	NC_000913.3	281045	C	CG	coding	yagA
Sample_SH8	NC_000913.3	380012	AGG	A	noncoding	-
Sample_SH8	NC_000913.3	388674	CT	C	noncoding	-
Sample_SH8	NC_000913.3	1547253	GT	G	noncoding	-
Sample_SH8	NC_000913.3	1594124	G	GCC	noncoding	-
Sample_SH8	NC_000913.3	1840945	T	TC	coding	ynjF
Sample_SH8	NC_000913.3	2052058	C	CT	noncoding	-
Sample_SH8	NC_000913.3	2682150	T	TC	coding	yphG
Sample_SH8	NC_000913.3	2734535	T	TCCC	coding	yfiH
Sample_SH8	NC_000913.3	2877939	G	GCC	noncoding	-
Sample_SH8	NC_000913.3	2994195	TA	T	noncoding	-
Sample_SH8	NC_000913.3	3001297	C	CG	coding	xdhA
Sample_SH8	NC_000913.3	3379259	T	TCC	coding	yhcM
Sample_SH8	NC_000913.3	3570082	G	GC	coding	glgX
Sample_SH8	NC_000913.3	3624036	A	AG	noncoding	-
Sample_SH8	NC_000913.3	4322043	T	TC	coding	phnF
Sample_SH8	NC_000913.3	4465633	A	AT	coding	treB
Sample_SH9	NC_000913.3	3091307	C	CA	coding	rsmE
Sample_SH9	NC_000913.3	4474269	A	AC	coding	bdcR
Sample_SH10	NC_000913.3	136493	T	TA	noncoding	-
Sample_SH10	NC_000913.3	321557	T	TG	noncoding	-
Sample_SH10	NC_000913.3	371582	TG	T	coding	mhpC
Sample_SH10	NC_000913.3	402477	GA	G	coding	phoA
Sample_SH10	NC_000913.3	467816	C	CA	coding	cof
Sample_SH10	NC_000913.3	890402	T	TG	coding	ybjM
Sample_SH10	NC_000913.3	981844	CG	C	coding	ldtD
Sample_SH10	NC_000913.3	1182029	G	GT	coding	potD
Sample_SH10	NC_000913.3	1286563	GT	G	noncoding	-
Sample_SH10	NC_000913.3	1594577	GT	G	noncoding	-
Sample_SH10	NC_000913.3	1714317	CT	C	noncoding	-
Sample_SH10	NC_000913.3	1906176	GA	G	coding	mntP
Sample_SH10	NC_000913.3	1927235	G	GC	coding	ptrB
Sample_SH10	NC_000913.3	1988100	G	GC	noncoding	-
Sample_SH10	NC_000913.3	2077169	T	TG	coding	cbeA
Sample_SH10	NC_000913.3	3177503	GC	G	coding	nudF
Sample_SH10	NC_000913.3	3582319	GA	G	coding	yhhZ
Sample_SH10	NC_000913.3	4101721	C	CG	coding	kdgT
Sample_SH10	NC_000913.3	4329888	T	TG	coding	yjcZ
Sample_SH10	NC_000913.3	4474269	A	AC	coding	bdcR
Sample_SH11	NC_000913.3	44375	G	GC	coding	fixC
Sample_SH11	NC_000913.3	244498	T	TC	coding	yafJ
Sample_SH11	NC_000913.3	285641	T	TG	coding	yagG
Sample_SH11	NC_000913.3	468263	GT	G	noncoding	-
Sample_SH11	NC_000913.3	635154	G	GT	coding	ybdM
Sample_SH11	NC_000913.3	1227587	C	CG	noncoding	-
Sample_SH11	NC_000913.3	1421631	T	TC	coding	ydaU
Sample_SH11	NC_000913.3	1821859	CA	C	noncoding	-
Sample_SH11	NC_000913.3	2215827	G	GC	coding	yehW
Sample_SH11	NC_000913.3	2336672	AT	A	noncoding	-
Sample_SH11	NC_000913.3	2816584	CA	C	coding	yqaA
Sample_SH11	NC_000913.3	3270481	T	TCC	noncoding	-
Sample_SH11	NC_000913.3	3332674	GC	G	coding	yhbE
Sample_SH11	NC_000913.3	3536631	TA	T	noncoding	-
Sample_SH11	NC_000913.3	3609012	TA	T	noncoding	-
Sample_SH11	NC_000913.3	3785130	GA	G	noncoding	-
Sample_SH11	NC_000913.3	3930328	CT	C	coding	ravA
Sample_SH11	NC_000913.3	3951227	C	CA	noncoding	-
Sample_SH12	NC_000913.3	260898	C	CA	coding	proB
Sample_SH12	NC_000913.3	303087	T	TG	coding	yagU
Sample_SH12	NC_000913.3	643310	C	CG	coding	ybdR
Sample_SH12	NC_000913.3	669828	A	AG	coding	cobC
Sample_SH12	NC_000913.3	792162	GT	G	noncoding	-
Sample_SH12	NC_000913.3	1119433	TA	T	coding	yceO
Sample_SH12	NC_000913.3	1269420	G	GC	noncoding	-
Sample_SH12	NC_000913.3	1594124	G	GCC	noncoding	-
Sample_SH12	NC_000913.3	2057669	AC	A	noncoding	-
Sample_SH12	NC_000913.3	2200446	GA	G	coding	yehI
Sample_SH12	NC_000913.3	2225635	G	GC	noncoding	-
Sample_SH12	NC_000913.3	2972853	C	CT	coding	lplT
Sample_SH12	NC_000913.3	2999673	A	AGG	coding	ygeR
Sample_SH12	NC_000913.3	4065580	TA	T	coding	yihO
Sample_SH12	NC_000913.3	4312196	CA	C	coding	alsR
Sample_SH14	NC_000913.3	143727	T	TA	coding	yadH
Sample_SH14	NC_000913.3	285641	T	TG	coding	yagG
Sample_SH14	NC_000913.3	304946	CG	C	coding	ecpE
Sample_SH14	NC_000913.3	515320	T	TC	coding	qmcA
Sample_SH14	NC_000913.3	1594248	T	TCC	noncoding	-
Sample_SH14	NC_000913.3	1606387	TC	T	coding	lsrF
Sample_SH14	NC_000913.3	2033731	CT	C	noncoding	-
Sample_SH14	NC_000913.3	3864646	T	TG	coding	yidE
Sample_SH14	NC_000913.3	4392268	T	TG	noncoding	-
Sample_SH15	NC_000913.3	317678	A	AGG	noncoding	-
Sample_SH15	NC_000913.3	1029731	GA	G	coding	rlmI
Sample_SH15	NC_000913.3	1212080	A	ACC	noncoding	-
Sample_SH15	NC_000913.3	1392753	GA	G	coding	pgrR
Sample_SH15	NC_000913.3	1460682	A	AG	coding	paaI
Sample_SH15	NC_000913.3	1594124	G	GCC	noncoding	-
Sample_SH15	NC_000913.3	1606154	CA	C	coding	lsrF
Sample_SH15	NC_000913.3	1709408	T	TCC	coding	rsxD
Sample_SH15	NC_000913.3	2481896	GA	G	coding	emrY
Sample_SH15	NC_000913.3	2550961	CA	C	coding	yfeY
Sample_SH15	NC_000913.3	2622945	GT	G	noncoding	-
Sample_SH15	NC_000913.3	2884206	T	TA	noncoding	-
Sample_SH15	NC_000913.3	3001297	C	CG	coding	xdhA
Sample_SH15	NC_000913.3	3798651	AT	A	coding	waaU
Sample_SH15	NC_000913.3	4060271	GT	G	noncoding	-
Sample_SH15	NC_000913.3	4606322	A	AG	noncoding	-
Sample_SH16	NC_000913.3	136449	GT	G	coding	speE
Sample_SH16	NC_000913.3	321557	T	TG	noncoding	-
Sample_SH16	NC_000913.3	685935	GC	G	coding	gltJ
Sample_SH16	NC_000913.3	910406	G	GC	coding	poxB
Sample_SH16	NC_000913.3	1029731	GA	G	coding	rlmI
Sample_SH16	NC_000913.3	1255825	A	AG	coding	ycgV
Sample_SH16	NC_000913.3	1370035	GT	G	noncoding	-
Sample_SH16	NC_000913.3	1474309	G	GC	coding	ydbC
Sample_SH16	NC_000913.3	1479681	CG	C	coding	ynbC
Sample_SH16	NC_000913.3	1847718	GC	G	coding	selD
Sample_SH16	NC_000913.3	1923328	G	GT	noncoding	-
Sample_SH16	NC_000913.3	2214333	G	GC	coding	yehU
Sample_SH16	NC_000913.3	2319770	T	TA	coding	rcsC
Sample_SH16	NC_000913.3	2642173	C	CG	coding	rodZ
Sample_SH16	NC_000913.3	2667707	G	GC	coding	hcaT
Sample_SH16	NC_000913.3	2712707	C	CA	coding	trmN
Sample_SH16	NC_000913.3	2826462	GA	G	coding	srlE
Sample_SH16	NC_000913.3	3001297	C	CG	coding	xdhA
Sample_SH16	NC_000913.3	3134351	CA	C	coding	yghT
Sample_SH16	NC_000913.3	3146785	CA	C	noncoding	-
Sample_SH16	NC_000913.3	3147761	GT	G	noncoding	-
Sample_SH16	NC_000913.3	3240977	C	CG	coding	sstT
Sample_SH16	NC_000913.3	3902308	AT	A	coding	bglB
Sample_SH16	NC_000913.3	4009128	TA	T	noncoding	-
Sample_SH16	NC_000913.3	4363012	TAG	T	coding	yjdC
Sample_SH16	NC_000913.3	4488572	T	TC	coding	yjgR
Sample_SH16	NC_000913.3	4589691	G	GT	coding	yjiY

## Sheet: S4
Table S4. Mutation enrichment analysis on mutated genes.
Coding sequence length in the gene	Observed mutated gene counts	Total generations across all treated wild-type MA lines	Genes	Expected number of mutations per locus given the mean mutation rate of treated groups	Poisson cumulative probability of > observed mutations in the gene	Significant
768	2	286000	ssuB	0.0487619	0.00115091	No
891	2	286000	arnD	0.0565714	0.00154107	No
972	2	286000	manX	0.0617142	0.00182776	No
1320	2	286000	idnT	0.0838094	0.00332182	No
1572	2	286000	garD	0.0998094	0.00466161	No
1602	2	286000	aceB	0.101714	0.00483514	No
1704	2	286000	yfjW	0.10819	0.00544709	No
2103	2	286000	yhfK	0.133524	0.00815913	No
141	1	286000	yceO	0.00895237	0.00891242	No
141	1	286000	ylcG	0.00895237	0.00891242	No
2340	2	286000	bcsB	0.148571	0.0100021	No
219	1	286000	osmB	0.0139047	0.0138085	No
261	1	286000	mcbA	0.0165714	0.0164349	No
288	1	286000	relE	0.0182857	0.0181195	No
354	1	286000	ybaA	0.0224762	0.0222255	No
360	1	286000	frdD	0.0228571	0.0225979	No
366	1	286000	fliO	0.0232381	0.0229701	No
366	1	286000	mdtJ	0.0232381	0.0229701	No
384	1	286000	grcA	0.0243809	0.0240861	No
420	1	286000	trxC	0.0266666	0.0263142	No
459	1	286000	mgsA	0.0291428	0.0287223	No
471	1	286000	cynS	0.0299047	0.029462	No
477	1	286000	rsd	0.0302857	0.0298317	No
522	1	286000	fecI	0.0331428	0.0325996	No
531	1	286000	cybB	0.0337143	0.0331523	No
540	1	286000	rplE	0.0342857	0.0337046	No
540	1	286000	rpsG	0.0342857	0.0337046	No
567	1	286000	chrR	0.036	0.0353597	No
579	1	286000	ygfB	0.0367619	0.0360944	No
588	1	286000	hyaD	0.0373333	0.036645	No
591	1	286000	uidR	0.0375238	0.0368285	No
594	1	286000	yhgN	0.0377142	0.0370119	No
597	1	286000	yadK	0.0379047	0.0371953	No
603	1	286000	ais	0.0382857	0.037562	No
609	1	286000	yibF	0.0386666	0.0379286	No
624	1	286000	yadS	0.039619	0.0388444	No
639	1	286000	msrA	0.0405714	0.0397594	No
654	1	286000	ynjD	0.0415238	0.0406735	No
663	1	286000	can	0.0420952	0.0412215	No
666	1	286000	yecA	0.0422857	0.0414041	No
669	1	286000	ftsE	0.0424761	0.0415867	No
675	1	286000	cohE	0.0428571	0.0419517	No
678	1	286000	ybiX	0.0430476	0.0421342	No
714	1	286000	lpxT	0.0453333	0.0443211	No
717	1	286000	arcA	0.0455238	0.0445031	No
726	1	286000	pyrH	0.0460952	0.0450489	No
732	1	286000	artI	0.0464761	0.0454127	No
735	1	286000	ypdB	0.0466666	0.0455945	No
741	1	286000	cysQ	0.0470476	0.045958	No
747	1	286000	glnH	0.0474285	0.0463214	No
774	1	286000	hisP	0.0491428	0.0479548	No
774	1	286000	zupT	0.0491428	0.0479548	No
792	1	286000	nei	0.0502857	0.0490423	No
798	1	286000	fhuC	0.0506666	0.0494045	No
801	1	286000	yafD	0.0508571	0.0495855	No
825	1	286000	dapD	0.0523809	0.0510327	No
831	1	286000	frlC	0.0527619	0.0513941	No
834	1	286000	csgG	0.0529523	0.0515748	No
834	1	286000	prmC	0.0529523	0.0515748	No
834	1	286000	xapA	0.0529523	0.0515748	No
852	1	286000	tauD	0.0540952	0.0526581	No
861	1	286000	ydbC	0.0546666	0.0531993	No
873	1	286000	yebZ	0.0554285	0.0539203	No
885	1	286000	yeaD	0.0561904	0.0546409	No
894	1	286000	nadC	0.0567618	0.0551809	No
894	1	286000	ybcF	0.0567618	0.0551809	No
909	1	286000	citE	0.0577142	0.0560803	No
927	1	286000	livH	0.0588571	0.0571585	No
951	1	286000	corA	0.0603809	0.0585941	No
951	1	286000	paaX	0.0603809	0.0585941	No
957	1	286000	yfjH	0.0607618	0.0589527	No
963	1	286000	ldtC	0.0611428	0.0593111	No
963	1	286000	tauA	0.0611428	0.0593111	No
966	1	286000	dusB	0.0613333	0.0594903	No
966	1	286000	wcaG	0.0613333	0.0594903	No
969	1	286000	astE	0.0615237	0.0596694	No
972	1	286000	yfbL	0.0617142	0.0598485	No
975	1	286000	cysB	0.0619047	0.0600275	No
978	1	286000	yrbG	0.0620952	0.0602066	No
984	1	286000	ydaN	0.0624761	0.0605645	No
987	1	286000	ycdU	0.0626666	0.0607434	No
990	1	286000	sbp	0.0628571	0.0609223	No
996	1	286000	gapA	0.063238	0.06128	No
996	1	286000	gntR	0.063238	0.06128	No
1005	1	286000	yegU	0.0638095	0.0618163	No
1017	1	286000	lplA	0.0645714	0.0625308	No
1023	1	286000	ddpB	0.0649523	0.0628879	No
1029	1	286000	torT	0.0653333	0.0632448	No
1032	1	286000	metN	0.0655237	0.0634232	No
1044	1	286000	selD	0.0662856	0.0641365	No
1053	1	286000	fbaB	0.0668571	0.0646711	No
1065	1	286000	hemE	0.067619	0.0653835	No
1074	1	286000	ycfT	0.0681904	0.0659174	No
1080	1	286000	waaB	0.0685714	0.0662732	No
1089	1	286000	yehL	0.0691428	0.0668066	No
1104	1	286000	glf	0.0700952	0.0676949	No
1110	1	286000	anmK	0.0704761	0.06805	No
1119	1	286000	ybdK	0.0710475	0.0685824	No
1119	1	286000	yjhC	0.0710475	0.0685824	No
1131	1	286000	wecB	0.0718095	0.0692918	No
1137	1	286000	yiaV	0.0721904	0.0696463	No
1140	1	286000	queG	0.0723809	0.0698235	No
1158	1	286000	ampH	0.0735237	0.0708859	No
1161	1	286000	metB	0.0737142	0.0710629	No
1164	1	286000	gspL	0.0739047	0.0712398	No
1164	1	286000	intD	0.0739047	0.0712398	No
1167	1	286000	ygbK	0.0740952	0.0714167	No
1179	1	286000	ubiH	0.0748571	0.0721239	No
1185	1	286000	emrD	0.075238	0.0724773	No
1185	1	286000	tufB	0.075238	0.0724773	No
1188	1	286000	metC	0.0754285	0.072654	No
1191	1	286000	glpC	0.075619	0.0728306	No
1191	1	286000	nepI	0.075619	0.0728306	No
1194	1	286000	yphH	0.0758094	0.0730072	No
1200	1	286000	lolC	0.0761904	0.0733602	No
1203	1	286000	pncB	0.0763809	0.0735367	No
1203	1	286000	yfaY	0.0763809	0.0735367	No
1212	1	286000	ydhC	0.0769523	0.074066	No
1221	1	286000	astC	0.0775237	0.0745949	No
1242	1	286000	intA	0.0788571	0.075828	No
1248	1	286000	wzxB	0.079238	0.07618	No
1257	1	286000	xapB	0.0798094	0.0767077	No
1260	1	286000	rhaA	0.0799999	0.0768836	No
1266	1	286000	ydiN	0.0803809	0.0772352	No
1278	1	286000	yggP	0.0811428	0.077938	No
1284	1	286000	yebS	0.0815237	0.0782892	No
1299	1	286000	purA	0.0824761	0.0791666	No
1311	1	286000	abgA	0.083238	0.0798679	No
1323	1	286000	xylA	0.0839999	0.0805687	No
1332	1	286000	argA	0.0845713	0.0810939	No
1338	1	286000	amiB	0.0849523	0.0814439	No
1341	1	286000	gudX	0.0851428	0.0816188	No
1350	1	286000	qseC	0.0857142	0.0821435	No
1359	1	286000	ydjE	0.0862856	0.0826678	No
1362	1	286000	ffh	0.0864761	0.0828425	No
1392	1	286000	narK	0.0883809	0.0845878	No
1398	1	286000	ulaA	0.0887618	0.0849365	No
1404	1	286000	eutE	0.0891428	0.085285	No
1407	1	286000	chiP	0.0893332	0.0854592	No
1419	1	286000	phr	0.0900951	0.0861558	No
1419	1	286000	yahG	0.0900951	0.0861558	No
1425	1	286000	patD	0.0904761	0.0865038	No
1434	1	286000	glgA	0.0910475	0.0870257	No
1464	1	286000	ttdT	0.0929523	0.088763	No
1479	1	286000	astD	0.0939047	0.0896305	No
1503	1	286000	proP	0.0954285	0.0910166	No
1533	1	286000	alsA	0.0973332	0.0927464	No
1533	1	286000	citF	0.0973332	0.0927464	No
1536	1	286000	lsrA	0.0975237	0.0929192	No
1539	1	286000	aldB	0.0977142	0.0930919	No
1542	1	286000	ppx	0.0979047	0.0932647	No
1557	1	286000	yoaE	0.098857	0.0941278	No
1641	1	286000	trg	0.10419	0.0989463	No
1644	1	286000	flgK	0.104381	0.0991179	No
1680	1	286000	ycjM	0.106667	0.101175	No
1698	1	286000	ypdA	0.107809	0.102201	No
1701	1	286000	narQ	0.108	0.102372	No
1713	1	286000	cysI	0.108762	0.103056	No
1716	1	286000	dld	0.108952	0.103227	No
1722	1	286000	cydC	0.109333	0.103568	No
1776	1	286000	fucI	0.112762	0.106637	No
1968	1	286000	yjhG	0.124952	0.117461	No
1986	1	286000	gmr	0.126095	0.118469	No
2016	1	286000	ligA	0.128	0.120147	No
2097	1	286000	gfcD	0.133143	0.12466	No
2109	1	286000	spoT	0.133905	0.125327	No
2163	1	286000	uvrD	0.137333	0.12832	No
2187	1	286000	arpA	0.138857	0.129648	No
2259	1	286000	xdhA	0.143428	0.133617	No
2274	1	286000	tynA	0.144381	0.134442	No
2283	1	286000	pflB	0.144952	0.134936	No
2307	1	286000	ydbD	0.146476	0.136254	No
2334	1	286000	bisC	0.14819	0.137733	No
2415	1	286000	gyrB	0.153333	0.142156	No
2433	1	286000	bamA	0.154476	0.143136	No
2433	1	286000	metL	0.154476	0.143136	No
2526	1	286000	ecpC	0.160381	0.148181	No
2547	1	286000	torA	0.161714	0.149316	No
2598	1	286000	topA	0.164952	0.152066	No
2604	1	286000	sfmD	0.165333	0.152389	No
2619	1	286000	bcsA	0.166286	0.153196	No
2628	1	286000	gyrA	0.166857	0.153679	No
2841	1	286000	glnE	0.180381	0.165048	No
3051	1	286000	fdoG	0.193714	0.176107	No
3078	1	286000	mdtC	0.195428	0.177518	No
3114	1	286000	acrD	0.197714	0.179396	No
3120	1	286000	flu	0.198095	0.179708	No
3318	1	286000	yegE	0.210666	0.189956	No
3447	1	286000	mfd	0.218857	0.196563	No
3525	1	286000	pfo	0.223809	0.200532	No
3633	1	286000	yehI	0.230666	0.205996	No
3780	1	286000	tamB	0.24	0.213372	No
3903	1	286000	hrpA	0.247809	0.219491	No
4194	1	286000	rhsC	0.266285	0.23378	No
4563	1	286000	sslE	0.289714	0.251522	No
4581	1	286000	ypjA	0.290857	0.252377	No

## Sheet: S5
Table S5. IS insertion rate through transposition
Group	IS1-1	IS5-1	IS6-4	IS4-1	IS3-1	IS6-1	Number of MA lines	Cell divisions per line	IS transposition rate	Poisson confidence interval lower bound	Poisson confidence interval upper bound
A	9	10	1	1	1	1	28	2427	0.000338454	0.000214551	0.000507681
D	6	4	2	0	1	1	25	2350	0.000238298	0.000130213	0.00039983
E	2	9	0	0	1	0	27	2441	0.000182075	9.40719e-05	0.000318024
F	7	2	0	0	0	0	25	2112	0.000163899	7.80303e-05	0.000323485
G	7	5	0	0	0	0	23	1992	0.000261917	0.000135324	0.000457482
H	13	9	1	0	0	0	45	1414	0.000361465	0.000229137	0.000542197
SA	0	4	0	0	0	0	8	1410	0.00035461	9.66312e-05	0.000907801
SD	2	1	0	0	0	0	10	1304	0.000230061	4.7546e-05	0.000672546
SE	3	0	0	0	0	0	9	1322	0.000252143	5.21096e-05	0.000737099
SF	0	1	0	0	0	0	5	2050	9.7561e-05	2.43902e-06	0.000543415
SG	2	3	0	0	0	0	7	1992	0.000358577	0.000116179	0.000836919
SH	2	1	0	0	0	0	9	1420	0.000234742	4.85133e-05	0.000686228
